# Supplementary material for: Exposure to arsenic and intra-chromosomal instability in blood
Source: Royal Society of Chemistry journal article supplement (doi:10.1039/c4mt00128a), 2014-01-01
Supplement: c4mt00128a1.xlsx [file c4mt00128a1.xlsx]

## Sheet: RAW-data
sample ID	chromosome nr.	loc.start	loc.end	segment mean
1	1	15865	449076	0.0645
1	1	530959	567501	-0.1685
1	1	567747	161520972	-0.0024
1	1	161563355	161591659	-0.4071
1	1	161594100	180991969	-0.0006
1	1	180992098	180992117	-0.6758
1	1	180993237	228744111	0.0016
1	1	228756711	228756714	-0.7899
1	1	228773464	249212500	-0.0008
1	2	45264	114260142	0.0003
1	2	114260766	114261270	-1.1467
1	2	114261369	243035414	0.0028
1	3	114243	123601558	0.0003
1	3	123602485	123607235	-0.3489
1	3	123632556	195402182	0.0006
1	3	195423806	195474182	0.138
1	3	195474967	197896800	0.0058
1	4	11068	4111130	0.0051
1	4	4117213	4149928	0.2018
1	4	4162205	191016112	0.0056
1	5	12322	2739602	0.0076
1	5	2739652	2739892	-0.6225
1	5	2740132	77140985	0.0048
1	5	77142469	77147651	-0.2101
1	5	77148552	79950383	0.0017
1	5	79950501	79950508	-0.4535
1	5	79950611	135416205	0.0044
1	5	135416331	135416412	-0.4211
1	5	135416529	140091102	-0.006
1	5	140097950	140098496	-0.3175
1	5	140105089	140554081	0.0251
1	5	140554610	140557256	0.3801
1	5	140557583	167718496	-0.0012
1	5	167718524	167718536	-0.6515
1	5	167718982	180876320	-0.0004
1	6	148112	30039010	0.0007
1	6	30039013	30039524	0.2004
1	6	30039548	31082939	-0.0021
1	6	31083322	31084107	-0.504
1	6	31084146	31148552	-0.0051
1	6	31148606	31148612	-1.4197
1	6	31148657	171036378	0.0027
1	7	31006	159127977	0.0026
1	8	29111	215923	0.0227
1	8	216453	216703	-0.348
1	8	216788	6796902	0.007
1	8	6826392	6837932	-0.5125
1	8	6838024	146280537	0.0018
1	9	11410	115833890	-0.0015
1	9	115835613	115841081	0.5688
1	9	115841105	141111396	-0.0025
1	10	91802	135381727	0
1	10	135381851	135524081	-0.2295
1	11	123899	134945848	0.0003
1	12	148077	8371626	-0.0041
1	12	8371812	8380472	0.2565
1	12	8380785	9436616	0.0086
1	12	9436621	9437009	0.5835
1	12	9439804	54402443	0.0022
1	12	54402697	54402717	0.4361
1	12	54402888	133779169	0.0003
1	13	19060404	115092495	0.0037
1	14	19109438	107284280	-0.0007
1	15	20101612	20375666	0.0443
1	15	20377131	22560713	0.2286
1	15	22646692	102506257	-0.0017
1	15	102511865	102520452	0.4598
1	16	60438	1305718	0.0049
1	16	1306340	1306346	0.5053
1	16	1306872	83966922	-0.0016
1	16	83967363	83968316	0.5273
1	16	83968360	90238222	0.0019
1	17	5999	18326064	-0.0017
1	17	18378879	18432149	0.2108
1	17	18473054	18965580	-0.0049
1	17	18967111	19140637	-0.3084
1	17	19140653	34595432	-0.0022
1	17	34597546	34641309	0.2577
1	17	34745068	77436344	-0.0027
1	17	77454278	77454437	0.463
1	17	77457534	78808570	0.0029
1	17	78809403	78809873	0.9007
1	17	78811536	81060149	0.0088
1	18	11231	78007841	-0.0021
1	19	70880	33667550	-0.0001
1	19	33667906	33667908	-0.6113
1	19	33668093	49866917	-0.0036
1	19	49866923	49866942	-0.5432
1	19	49866963	51104955	-0.0067
1	19	51107558	51108274	0.2769
1	19	51111137	53303448	-0.0041
1	19	53324198	53357134	-0.3024
1	19	53359733	59095508	0.0009
1	20	67000	62960200	-0.0022
1	21	10882029	47602702	0.0007
1	21	47604052	47604654	-0.2713
1	21	47604986	48091011	-0.0072
1	22	16123266	20310676	-0.0004
1	22	20342520	20502597	0.3396
1	22	20504411	24267277	0.0057
1	22	24284359	24300612	-1.8633
1	22	24302043	24373011	0.096
1	22	24373054	24381773	0.6311
1	22	24384525	51225561	-0.0019
ID	chrom	loc.start	loc.end	seg,mean
2	1	15865	12837410	0.0222
2	1	12851619	12908251	-0.2612
2	1	12908455	12940599	-0.7659
2	1	12944986	13501140	-0.1608
2	1	13515991	249212500	-0.0075
2	2	45264	243035414	-0.0025
2	3	114243	197896800	-0.007
2	4	11068	132671417	0.0009
2	4	132671715	132899064	0.1913
2	4	132899460	151501298	-0.0146
2	4	151501623	151504138	0.1689
2	4	151504187	191016112	-0.0049
2	5	12322	1662987	0.033
2	5	1663755	1664252	0.5523
2	5	1665559	135416331	-0.0082
2	5	135416381	135416412	-0.5099
2	5	135416529	140223107	-0.0099
2	5	140228182	140237879	-0.3408
2	5	140240593	140554610	-0.0039
2	5	140554819	140559576	-0.3029
2	5	140559832	180876320	-0.0047
2	6	148112	290800	0.0212
2	6	291687	292596	0.4172
2	6	292823	25882402	-0.0044
2	6	25882463	25882590	-0.3718
2	6	25886385	31324941	-0.0187
2	6	31324962	31327376	-0.2617
2	6	31334738	74363775	-0.0051
2	6	74363879	74363888	0.5887
2	6	74363913	164942022	-0.0091
2	6	164975487	165324747	0.2898
2	6	165341241	167287812	0.0119
2	6	167312423	167315653	0.2959
2	6	167315975	171036378	0.0262
2	7	31006	6865965	0.0222
2	7	6865970	6867070	-0.6029
2	7	6869135	23452035	-0.0101
2	7	23454699	23454734	0.6386
2	7	23454952	27181067	-0.0068
2	7	27181418	27185282	0.1517
2	7	27185393	57483183	-0.0057
2	7	57484153	57484637	-0.2724
2	7	57484819	63014468	0.0282
2	7	63016648	63016835	0.6303
2	7	63018494	73256925	0.0107
2	7	73257045	73257083	-0.7273
2	7	73258222	75957040	0.0106
2	7	75957061	75957202	-0.5013
2	7	75957376	159127977	0.0015
2	8	29111	6932793	0.0322
2	8	6940591	6940624	-0.8716
2	8	6940702	88885043	-0.0042
2	8	88885186	88886432	0.155
2	8	88889648	135476712	-0.0123
2	8	135476917	135477810	0.4756
2	8	135478517	146280537	0.022
2	9	11410	45726443	-0.0035
2	9	45726961	66110525	-0.1427
2	9	66342602	115833890	-0.0024
2	9	115835613	115835616	0.5864
2	9	115837453	141111396	0.0187
2	10	91802	12999550	0.0162
2	10	12999599	12999618	0.7142
2	10	13002582	38716291	-0.0051
2	10	38738647	38739849	0.3359
2	10	38739885	45651238	0.0034
2	10	45675577	45693865	0.245
2	10	45693967	69835125	-0.0063
2	10	69835215	69835323	-0.7266
2	10	69838818	71389896	-0.0169
2	10	71389949	71389956	-0.5494
2	10	71389959	95232797	-0.004
2	10	95241944	95242555	-0.1731
2	10	95249627	135122020	0.0067
2	10	135122230	135122752	0.4116
2	10	135122788	135524081	-0.0053
2	11	123899	882687	0.0157
2	11	884807	890331	-0.1829
2	11	890505	134945848	0
2	12	148077	246082	0.0434
2	12	247224	247315	0.3584
2	12	247459	8539716	-0.0027
2	12	8541476	8543302	-0.6104
2	12	8543333	50794494	-0.0095
2	12	50794550	50794574	-0.5153
2	12	50794700	133779169	-0.0027
2	13	19060404	114840698	0.003
2	13	114840743	114841904	0.489
2	13	114842103	114963695	0.0381
2	13	114964101	114964125	-0.7058
2	13	114965537	115092495	0.0171
2	14	19109438	19597077	-0.0163
2	14	19600442	19614556	-0.3362
2	14	19614829	101192599	-0.0083
2	14	101192634	101192860	0.3353
2	14	101192913	103593235	0.0222
2	14	103593503	103593520	-0.3577
2	14	103593907	105372846	0.024
2	14	105373082	105373391	0.6036
2	14	105376413	107284280	0.0277
2	15	20101612	32569053	0.0098
2	15	32605028	32639426	0.2291
2	15	32639549	34700272	-0.0134
2	15	34726650	34812400	-0.2432
2	15	34817982	75094936	-0.0068
2	15	75095006	75095272	0.4422
2	15	75095377	102520452	-0.0024
2	16	60438	15951195	0.0159
2	16	15951224	15951230	0.6526
2	16	15951809	90238222	0.0073
2	17	5999	17713886	0.0065
2	17	17714293	17714414	-0.4041
2	17	17715520	18378879	-0.0039
2	17	18379129	18432149	-0.427
2	17	18473054	18965556	0.0019
2	17	18965580	19100051	0.2206
2	17	19136972	71188803	-0.002
2	17	71189054	71189068	0.4202
2	17	71189217	74303798	0.0078
2	17	74303886	74304204	-0.2601
2	17	74307529	78808570	0.0183
2	17	78809403	78809873	0.6141
2	17	78811536	79050221	0.0298
2	17	79051613	79052445	0.5015
2	17	79053905	81052243	0.0208
2	17	81052622	81052770	0.3379
2	17	81052836	81060149	0.0009
2	18	11231	78007841	0.0024
2	19	70880	59095508	0.0047
2	20	67000	62960200	0.0007
2	21	10882029	48091011	0.0087
2	22	16123266	24373011	0.0162
2	22	24373054	24373618	0.8842
2	22	24374012	47021767	0.0082
2	22	47022418	47023005	0.2453
2	22	47023209	51225561	0.022
ID	chrom	loc.start	loc.end	seg,mean
3	1	15865	13736832	0.008
3	1	13737234	13737267	0.5173
3	1	13796840	31192015	-0.0005
3	1	31192151	31192165	-0.4614
3	1	31192334	182361500	-0.002
3	1	182361507	182361509	0.5297
3	1	182361528	249212500	-0.0007
3	2	45264	1344122	0.0004
3	2	1358283	1358513	0.5105
3	2	1358684	132202004	-0.0011
3	2	132202427	132218302	0.387
3	2	132218639	239143338	-0.0007
3	2	239144301	239145904	-0.5849
3	2	239147445	241629815	0.009
3	2	241629829	241631239	0.6249
3	2	241631345	243035414	0.007
3	3	114243	194785559	-0.0027
3	3	194785978	194790434	-0.6406
3	3	194790491	195717344	-0.015
3	3	195717366	195717962	-0.3133
3	3	195719262	197896800	-0.0012
3	4	11068	4147643	0.0031
3	4	4147958	4149928	-0.6859
3	4	4162205	8727474	0.0017
3	4	9352827	9558077	0.1522
3	4	9558753	187109237	-0.0043
3	4	187111841	187111853	0.5984
3	4	187111940	191016112	0.0039
3	5	12322	1228081	0.0062
3	5	1228214	1244925	-0.2358
3	5	1245669	2739602	-0.0042
3	5	2739652	2739892	-0.6805
3	5	2740132	151986804	-0.0037
3	5	152022470	152029980	-0.5143
3	5	152069274	180876320	-0.001
3	6	148112	293331	-0.0286
3	6	296538	379514	-0.3468
3	6	379581	31235956	-0.0026
3	6	31237013	31239767	0.3341
3	6	31239910	31324684	0.0314
3	6	31324916	31325817	0.3343
3	6	31327376	32528968	0.0062
3	6	32529189	32554385	-0.1844
3	6	32554481	33091407	-0.0047
3	6	33091567	33092513	-0.1994
3	6	33092802	41068553	0.004
3	6	41068646	41068752	0.423
3	6	41069048	74363775	-0.002
3	6	74363879	74363888	0.7264
3	6	74363913	171036378	-0.0023
3	7	31006	159127977	0.0007
3	8	29111	6932793	0.0092
3	8	6940591	6940624	-0.8209
3	8	6940702	11977206	0.0058
3	8	11986501	12027122	0.1988
3	8	12030155	19674196	-0.0029
3	8	19674705	19674713	-0.4392
3	8	19674775	146280537	-0.0008
3	9	11410	115833890	-0.0012
3	9	115835613	115835616	-0.6746
3	9	115837453	141111396	0.0071
3	10	91802	94136	0.1685
3	10	94316	1204214	0.0014
3	10	1205222	1205942	0.2103
3	10	1206555	69835125	-0.0002
3	10	69835215	69835323	-0.2915
3	10	69838818	135524081	0.001
3	11	123899	113846017	0.0025
3	11	113846918	113846937	-0.6105
3	11	113848161	134945848	0.0016
3	12	148077	8015791	0.0007
3	12	8015903	8090274	0.1993
3	12	8112512	12503307	0.0014
3	12	12503455	12503457	-0.5903
3	12	12503544	131958981	-0.001
3	12	131959253	132152473	0.1502
3	12	132152645	133779169	0.0106
3	13	19060404	107220630	-0.0034
3	13	107220655	107220663	0.5186
3	13	107220725	115092495	0.0051
3	14	19109438	41469306	-0.0063
3	14	41623577	41623629	0.438
3	14	41623854	99640604	-0.0033
3	14	99641017	99641151	0.3709
3	14	99641778	107284280	0.0105
3	15	20101612	102520452	0.0004
3	16	60438	90238222	0.0029
3	17	5999	18378879	0.0018
3	17	18379129	18432149	-0.4128
3	17	18473054	45177378	-0.0002
3	17	45177429	45177431	-0.6063
3	17	45177598	55038442	0.0006
3	17	55038508	55038524	0.4151
3	17	55038611	78808570	0.0015
3	17	78809403	78809873	-0.7202
3	17	78811536	81060149	0.0072
3	18	11231	78007841	-0.0031
3	19	70880	43691878	0.0026
3	19	43691930	43711064	-0.5471
3	19	43769725	59095508	0
3	20	67000	62960200	-0.0002
3	21	10882029	48091011	0.0035
3	22	16123266	16286442	-0.0349
3	22	16286998	16405664	-0.244
3	22	16407026	20310676	-0.005
3	22	20342520	20670922	-0.1419
3	22	20706928	24345907	0.0046
3	22	24348715	24384525	-0.7304
3	22	24400408	51225561	0.0024
ID	chrom	loc.start	loc.end	seg,mean
4	1	15865	2415221	0.0001
4	1	2415344	2415453	-0.5378
4	1	2415965	249212500	-0.0007
4	2	45264	243035414	0.0001
4	3	114243	194785978	0.0005
4	3	194786218	194790434	-0.3665
4	3	194790491	197896800	-0.0006
4	4	11068	3713287	-0.0023
4	4	3726255	3726836	-0.3156
4	4	3730756	8456314	0.0079
4	4	8466269	8727474	0.1597
4	4	9352827	191016112	0.0007
4	5	12322	180375511	-0.0006
4	5	180396687	180408785	-1.1787
4	5	180408809	180876320	-0.0057
4	6	148112	27648605	-0.0008
4	6	27648895	27648908	-0.5955
4	6	27649120	31948433	-0.0011
4	6	31963526	31980043	-0.2557
4	6	31980046	32011687	-0.0604
4	6	32012897	32013710	-0.256
4	6	32013845	32032709	-0.0084
4	6	32032716	32032728	-0.4898
4	6	32032787	32121758	-0.0042
4	6	32121830	32121841	-0.4661
4	6	32121843	74363775	-0.0018
4	6	74363879	74363888	-0.5836
4	6	74363913	171036378	-0.0019
4	7	31006	62765329	-0.0029
4	7	62809321	62859557	-0.8499
4	7	62904398	73256925	0.0019
4	7	73257045	73257083	-0.5339
4	7	73258222	96652115	0.0029
4	7	96652123	96652375	0.3124
4	7	96652464	159127977	-0.0012
4	8	29111	146280537	-0.0013
4	9	11410	115833890	-0.0008
4	9	115835613	115841081	0.4544
4	9	115841105	141111396	-0.0031
4	10	91802	1204214	-0.0037
4	10	1205222	1205942	-0.1724
4	10	1206555	12999550	-0.0013
4	10	12999599	12999618	0.6123
4	10	13002582	30638275	0.0007
4	10	30638342	30638372	-0.7241
4	10	30638455	69835125	-0.0021
4	10	69835215	69835323	0.6832
4	10	69838818	135122020	0.0002
4	10	135122230	135122752	-0.248
4	10	135122788	135524081	0.0059
4	11	123899	134945848	0
4	12	148077	113229534	0.0013
4	12	113229582	113229584	0.6692
4	12	113229617	132879809	0.0003
4	12	132879967	132880128	0.4712
4	12	132880790	133779169	0.0033
4	13	19060404	115092495	-0.0012
4	14	19109438	107284280	-0.0009
4	15	20101612	102520452	-0.0008
4	16	60438	2039030	0.0028
4	16	2039391	2039411	-0.5385
4	16	2039815	88263144	-0.001
4	16	88263261	88263263	-0.91
4	16	88263686	90238222	-0.0011
4	17	5999	932700	0.0032
4	17	933047	933155	0.5453
4	17	933179	55038442	0.0017
4	17	55038508	55038524	-0.5333
4	17	55038611	78808570	-0.0007
4	17	78809403	78809873	-0.5225
4	17	78811536	81060149	0.0005
4	18	11231	12254473	-0.0003
4	18	12254551	12254556	-0.5216
4	18	12254566	78007841	-0.0005
4	19	70880	4607219	0.0043
4	19	4607318	4607324	-0.6226
4	19	4607540	10172119	0.0012
4	19	10172712	10172899	0.4142
4	19	10174041	43271112	0.0047
4	19	43355659	43531770	-0.3084
4	19	43531821	59095508	0.003
4	20	67000	2633324	0.0016
4	20	2633340	2633362	0.5556
4	20	2633605	62131260	0.0005
4	20	62131960	62152128	-0.2242
4	20	62152146	62960200	-0.003
4	21	10882029	42219193	0.0017
4	21	42219202	42219221	-0.9894
4	21	42219299	48091011	-0.0057
4	22	16123266	18668835	-0.0081
4	22	18669132	18835783	0.1969
4	22	18836081	24373011	-0.0062
4	22	24373054	24373618	0.3205
4	22	24374012	39354115	0.0002
4	22	39377790	39378425	0.2365
4	22	39381429	41940355	0.0026
4	22	41940476	41940697	-0.2226
4	22	41940855	51225561	-0.0013
ID	chrom	loc.start	loc.end	seg,mean
5	1	15865	13736832	-0.0074
5	1	13737234	13737267	-0.8465
5	1	13796840	16974585	-0.0002
5	1	16975005	16975443	-0.7157
5	1	16985148	65613311	0.0033
5	1	65613383	65613392	-0.664
5	1	65613403	85040158	-0.0005
5	1	85040254	85040343	-0.2782
5	1	85040371	161520972	0.0053
5	1	161563355	161601053	0.2348
5	1	161601721	200703859	0.005
5	1	200707086	200708027	-0.4034
5	1	200708096	228744111	0.0026
5	1	228756711	228756714	-0.6658
5	1	228773464	249212500	0.0009
5	2	45264	243035414	0.0013
5	3	114243	113465629	0.0033
5	3	113465772	113465925	-0.4313
5	3	113466193	192561922	0.0034
5	3	192568714	192584827	-0.2865
5	3	192597855	197896800	0.0008
5	4	11068	7750448	-0.0075
5	4	7750480	7750489	-0.5182
5	4	7754366	191016112	0.0036
5	5	12322	135416205	0.001
5	5	135416331	135416412	-0.4275
5	5	135416529	140091102	0.0029
5	5	140097950	140098496	-0.2554
5	5	140105089	140554081	0.0133
5	5	140554610	140557256	-0.3496
5	5	140557583	180408785	0.0032
5	5	180408809	180527697	0.2136
5	5	180531288	180876320	0.0055
5	6	148112	290800	0.0092
5	6	291687	379514	-0.1134
5	6	379581	29894197	0.008
5	6	29894228	29894248	-0.6202
5	6	29894253	31324319	0.0011
5	6	31324491	31334836	-0.2641
5	6	31347802	32032709	0.0032
5	6	32032716	32032728	-0.385
5	6	32032787	32121758	-0.0015
5	6	32121830	32121843	-0.2999
5	6	32122001	32451079	0.0067
5	6	32452388	32557404	0.3861
5	6	32557419	171036378	0.0025
5	7	31006	63222546	-0.0015
5	7	63222556	63225198	0.5611
5	7	63225776	65583242	0.0041
5	7	65604635	65723664	0.1862
5	7	65733966	159127977	-0.0009
5	8	29111	8085973	-0.009
5	8	8086144	8086146	0.697
5	8	8086607	19674196	0.0004
5	8	19674705	19674713	-0.3142
5	8	19674775	74005813	0.0022
5	8	74006994	74009438	-0.4353
5	8	74019754	82754313	0.002
5	8	82754387	82754497	-0.4729
5	8	82754900	146280537	-0.0033
5	9	11410	115833890	0.0017
5	9	115835613	115841081	-1.4431
5	9	115841105	115851947	-0.3487
5	9	115852992	141111396	-0.0086
5	10	91802	69835125	-0.0006
5	10	69835215	69835323	0.4051
5	10	69838818	71389896	0.0095
5	10	71389949	71389956	-0.677
5	10	71389959	135524081	-0.0005
5	11	123899	1083236	-0.0073
5	11	1083299	1086863	0.1179
5	11	1087601	60997852	0.001
5	11	61007964	61008041	0.4115
5	11	61008109	70256681	-0.0006
5	11	70257035	70257059	0.5352
5	11	70257149	134945848	0.0041
5	12	148077	50794494	0.0016
5	12	50794550	50794574	-0.56
5	12	50794700	113229534	0.0044
5	12	113229582	113229584	-0.3804
5	12	113229617	133779169	-0.0001
5	13	19060404	107220630	0.0021
5	13	107220655	107220663	-0.4282
5	13	107220725	115092495	-0.0073
5	14	19109438	20247697	-0.0337
5	14	20247919	20404281	0.1708
5	14	20444164	41469306	0.0051
5	14	41623577	41623629	0.4874
5	14	41623854	74001118	0.0031
5	14	74002584	74034619	-0.1529
5	14	74034893	107284280	-0.0024
5	15	20101612	102520452	0.0008
5	16	60438	15951195	-0.0035
5	16	15951224	15951230	-0.6069
5	16	15951809	90238222	-0.0017
5	17	5999	18965580	-0.001
5	17	18967111	19140629	-0.1809
5	17	19140637	34595432	0.0012
5	17	34597546	34639626	-0.4224
5	17	34641309	55038442	0.0032
5	17	55038508	55038524	-0.54
5	17	55038611	78808570	-0.0003
5	17	78809403	78809873	-0.6521
5	17	78811536	81060149	-0.0076
5	18	11231	78007841	-0.0034
5	19	70880	59095508	-0.001
5	20	67000	60521292	0.0014
5	20	60521757	60522664	-0.387
5	20	60523788	61660250	-0.0108
5	20	61660810	61666158	0.2578
5	20	61666554	62960200	-0.0143
5	21	10882029	48091011	-0.0053
5	22	16123266	20310676	-0.0083
5	22	20342520	20639089	-0.122
5	22	20640123	24345907	-0.0048
5	22	24348715	24384525	-0.7583
5	22	24400408	51225561	-0.0033
ID	chrom	loc.start	loc.end	seg,mean
6	1	15865	12908251	-0.0048
6	1	12908455	12946833	-0.623
6	1	13001318	17212040	0.0044
6	1	17213860	17265567	-0.1342
6	1	17278349	65613311	-0.0013
6	1	65613383	65613392	-0.6348
6	1	65613403	249212500	0.0015
6	2	45264	130954705	0.0009
6	2	130955686	130956915	0.2802
6	2	130959160	132202004	-0.0034
6	2	132202427	132203745	0.3406
6	2	132205917	243035414	0.0027
6	3	114243	44803071	0.002
6	3	44803084	44803129	0.5664
6	3	44803154	53926047	-0.0021
6	3	53926056	53926101	0.7117
6	3	53926156	197896800	0.0034
6	4	11068	4139592	-0.0048
6	4	4139646	4149928	-0.4297
6	4	4162205	42400738	0.0026
6	4	42400885	42401056	0.5771
6	4	42401149	46391532	0.0034
6	4	46391694	46391737	-0.4143
6	4	46391803	140222485	0.0053
6	4	140222502	140222523	-0.5812
6	4	140222620	191016112	0.0047
6	5	12322	140554081	0.0038
6	5	140554610	140557256	0.7132
6	5	140557583	180876320	0.0005
6	6	148112	29838356	0.0053
6	6	29851755	29898751	-0.312
6	6	29899989	29911028	-0.0235
6	6	29911087	29911339	-0.294
6	6	29911366	31148552	0.0009
6	6	31148606	31164924	0.276
6	6	31164947	31324684	0.0282
6	6	31324916	31347802	0.3996
6	6	31364902	31439497	-0.2667
6	6	31458944	32554481	-0.0023
6	6	32555411	32640493	0.2486
6	6	32707456	171036378	0.0027
6	7	31006	25019751	-0.0033
6	7	25019893	25019943	-0.9377
6	7	25020404	32535009	0.0064
6	7	32535165	32535189	-0.7105
6	7	32535387	56434617	0.0021
6	7	56434951	56437746	0.49
6	7	56439703	159127977	0.0005
6	8	29111	146280537	0.0009
6	9	11410	115833890	0.001
6	9	115835613	115835616	-1.0264
6	9	115837453	141111396	-0.0056
6	10	91802	69835125	0.0021
6	10	69835215	69835323	0.3127
6	10	69838818	71389896	0.0006
6	10	71389949	71389956	-0.5033
6	10	71389959	135524081	0.0012
6	11	123899	128080305	0
6	11	128105129	128107248	0.6419
6	11	128116707	134945848	0.0021
6	12	148077	8371626	0.0005
6	12	8371812	8380472	-0.1821
6	12	8380785	54402443	0.0023
6	12	54402697	54402717	0.3218
6	12	54402888	133779169	0.0019
6	13	19060404	115092495	0.002
6	14	19109438	41469306	0.0028
6	14	41623577	41623629	0.5004
6	14	41623854	73959688	0.0013
6	14	74001118	74026160	-0.307
6	14	74026915	107284280	-0.0012
6	15	20101612	21380498	0.0613
6	15	21905516	22560713	0.2337
6	15	22646692	75287548	0.0006
6	15	75287824	75287854	-0.4661
6	15	75287860	102520452	0
6	16	60438	15951195	-0.0019
6	16	15951224	15951230	-0.9546
6	16	15951809	90238222	-0.0007
6	17	5999	19015961	-0.0029
6	17	19030144	19030146	1.0663
6	17	19044873	81060149	-0.0015
6	18	11231	78007841	0.0014
6	19	70880	53289933	-0.0038
6	19	53290079	53290102	-1.5978
6	19	53290126	58951602	0
6	19	58951672	58951684	-0.6728
6	19	58951756	59095508	-0.0086
6	20	67000	60520027	-0.0007
6	20	60520624	60522664	-0.478
6	20	60523788	62960200	-0.008
6	21	10882029	48091011	-0.0012
6	22	16123266	51225561	-0.0049
ID	chrom	loc.start	loc.end	seg,mean
7	1	15865	21022984	0.0158
7	1	21023073	21023132	-1.066
7	1	21023254	85462857	0.0017
7	1	85462885	85462892	0.5029
7	1	85462939	152769896	-0.0051
7	1	152770502	152777382	0.5665
7	1	152778580	171771709	0.0004
7	1	171787181	171807195	0.4931
7	1	171809804	228744111	-0.0009
7	1	228756711	228756714	-1.0856
7	1	228773464	249212500	-0.0063
7	2	45264	243035414	-0.0015
7	3	114243	182506874	-0.0045
7	3	182509366	182510964	-0.1887
7	3	182511090	194785559	-0.0011
7	3	194785978	194790434	-0.4084
7	3	194790491	197896800	-0.0018
7	4	11068	22031559	0.0105
7	4	22148230	22148354	-0.4382
7	4	22239907	42400738	-0.0093
7	4	42400885	42401056	0.4914
7	4	42401149	49289994	-0.0259
7	4	49297073	49308567	-0.3612
7	4	49308684	68236744	-0.0105
7	4	68265207	68265891	0.3432
7	4	68303581	68751711	-0.0497
7	4	68776652	68919575	0.113
7	4	68928981	140222485	-0.0225
7	4	140222502	140222523	-0.537
7	4	140222620	191016112	-0.0163
7	5	12322	140554081	-0.007
7	5	140554610	140557256	0.3687
7	5	140557583	167718496	-0.0019
7	5	167718524	167718536	-0.5996
7	5	167718982	178960377	0.0064
7	5	178973820	178986412	-0.1196
7	5	178986620	180375511	0.0118
7	5	180396687	180428536	0.4149
7	5	180433174	180876320	-0.0034
7	6	148112	236559	0.0063
7	6	288505	293331	0.401
7	6	296538	171036378	-0.0039
7	7	31006	65583242	0.0021
7	7	65604635	65733966	0.1497
7	7	65746852	73256925	-0.0022
7	7	73257045	73257083	0.3977
7	7	73258222	143826860	-0.0091
7	7	143888190	144076774	0.1587
7	7	144077454	159127977	0.0062
7	8	29111	6932793	0.0022
7	8	6940591	6940624	-0.8588
7	8	6940702	145495665	-0.0036
7	8	145497339	145501817	-0.3612
7	8	145501862	146280537	0.0223
7	9	11410	141111396	0.0046
7	10	91802	69835125	-0.0046
7	10	69835215	69835323	-0.7686
7	10	69838818	71389896	-0.0121
7	10	71389949	71389956	-0.643
7	10	71389959	135524081	0.0059
7	11	123899	86142104	0.0061
7	11	86142407	86142587	0.29
7	11	86143260	134945848	-0.0007
7	12	148077	26986506	-0.0047
7	12	26986520	26986763	-0.3473
7	12	26986803	50297793	-0.0043
7	12	50297936	50297945	-0.4796
7	12	50298731	52586635	0.0059
7	12	52586810	52596367	0.3517
7	12	52598204	54402443	0.0114
7	12	54402697	54402717	-0.456
7	12	54402888	78288759	-0.0069
7	12	78340971	78588454	-0.1625
7	12	78603664	133779169	0.001
7	13	19060404	115092495	-0.0069
7	14	19109438	20215980	0.048
7	14	20247697	20404281	-0.2772
7	14	20444164	41469306	-0.0056
7	14	41623577	41623629	0.4599
7	14	41623854	107284280	0.0019
7	15	20101612	102520452	0.0011
7	16	60438	2039030	0.0203
7	16	2039391	2039411	-0.4987
7	16	2039815	15951195	0.0062
7	16	15951224	15951230	-0.5559
7	16	15951809	90238222	0.0067
7	17	5999	81060149	0.0066
7	18	11231	78007841	-0.0054
7	19	70880	387706	0.0284
7	19	387968	398562	-0.5365
7	19	401076	46389466	0.003
7	19	46389504	46389676	0.3811
7	19	46390101	49524256	0.0055
7	19	49527060	49527905	0.3642
7	19	49527945	53289933	0.0074
7	19	53290079	53290102	-1.482
7	19	53290126	58442865	-0.0009
7	19	58446312	58446988	-0.3268
7	19	58447434	59095508	0.0042
7	20	67000	62960200	0.0071
7	21	10882029	48091011	0.0055
7	22	16123266	51225561	0.0096
ID	chrom	loc.start	loc.end	seg,mean
8	1	15865	28571667	0.0137
8	1	28572299	28573940	-0.2367
8	1	28575269	31192015	0.0075
8	1	31192151	31192165	0.3432
8	1	31192334	110214317	-0.0048
8	1	110230252	110254919	0.15
8	1	110255096	182360822	-0.0017
8	1	182360902	182361509	0.2332
8	1	182361528	228744111	-0.0035
8	1	228756711	228756714	1.0474
8	1	228773464	249212500	-0.0032
8	2	45264	132202004	-0.0027
8	2	132202427	132202537	0.458
8	2	132202958	243035414	-0.0047
8	3	114243	12630135	-0.0001
8	3	12655573	12802190	0.1805
8	3	12809614	197896800	-0.0063
8	4	11068	7164855	0.0158
8	4	7184654	7187328	-0.266
8	4	7191910	7742526	0.0123
8	4	7750448	7750489	-0.4156
8	4	7754366	191016112	-0.0163
8	5	12322	646835	0.0113
8	5	649884	650104	-0.8004
8	5	653442	34019644	0.0036
8	5	34042976	34053399	-0.311
8	5	34188338	135416029	-0.0145
8	5	135416205	135416613	0.1958
8	5	135418308	140554081	-0.003
8	5	140554610	140557256	0.2633
8	5	140557583	180397910	-0.0004
8	5	180408785	180408809	0.5609
8	5	180428536	180876320	-0.0045
8	6	148112	236559	0.0182
8	6	288505	293331	0.4565
8	6	296538	7390048	0.0015
8	6	7390083	7390091	0.4431
8	6	7390136	29648381	-0.0124
8	6	29648400	29648901	0.2516
8	6	29649024	31324684	0.0005
8	6	31324916	31325817	-0.2803
8	6	31327376	32012900	0.0143
8	6	32013699	32013710	-0.3986
8	6	32013845	32032709	0.0139
8	6	32032716	32032728	-0.4973
8	6	32032787	32121758	0.0193
8	6	32121830	32121841	-0.3961
8	6	32121843	32489555	0.0128
8	6	32489750	32489991	-0.4965
8	6	32490444	33033312	-0.0004
8	6	33033484	33036958	0.1872
8	6	33037060	41068553	0.0104
8	6	41068646	41068752	0.3672
8	6	41069048	171036378	-0.0103
8	7	31006	32535009	0.0064
8	7	32535165	32535189	-0.41
8	7	32535387	62514477	-0.0021
8	7	62514572	62859557	0.1507
8	7	62904398	75957040	0.0035
8	7	75957061	75957202	-0.6611
8	7	75957376	159127977	-0.0014
8	8	29111	124780746	-0.0063
8	8	124780837	124780851	-0.252
8	8	124780911	141348605	0.0012
8	8	141348866	141349212	0.39
8	8	141353043	146280537	0.0192
8	9	11410	141111396	0.0029
8	10	91802	69835125	-0.0071
8	10	69835215	69835323	-0.843
8	10	69838818	71389896	-0.0051
8	10	71389949	71389956	-0.6552
8	10	71389959	109802441	-0.0004
8	10	109849668	109857081	-0.423
8	10	109910629	135122020	0.0054
8	10	135122230	135122752	0.3749
8	10	135122788	135524081	0.021
8	11	123899	17036042	0.0092
8	11	17036137	17036142	0.4695
8	11	17036337	58731634	-0.0048
8	11	58735304	58833356	0.1157
8	11	58866721	60997852	0.0002
8	11	61007964	61008041	0.382
8	11	61008109	70256681	0.0118
8	11	70257035	70257059	0.4408
8	11	70257149	71522461	0.0117
8	11	71524500	71527895	-0.1242
8	11	71543471	120039917	-0.0043
8	11	120040083	120044146	-0.1526
8	11	120044594	134945848	-0.0001
8	12	148077	6235155	0.0061
8	12	6241975	6243110	-0.3567
8	12	6250313	7781004	0.0038
8	12	7781093	7781431	-0.4944
8	12	7793353	9217079	-0.0124
8	12	9217390	9217859	-0.2364
8	12	9217907	46243365	-0.0141
8	12	46273255	46361154	0.2528
8	12	46380986	50794494	0.0016
8	12	50794550	50794574	-0.6359
8	12	50794700	53473279	0.0078
8	12	53473297	53473299	0.4251
8	12	53473304	54402443	-0.0037
8	12	54402697	54402717	0.3112
8	12	54402888	113229465	-0.0102
8	12	113229534	113229584	0.5019
8	12	113229617	133779169	0.0106
8	13	19060404	115092495	-0.005
8	14	19109438	19594171	0.0581
8	14	19597077	19686155	-0.1782
8	14	19686670	20147652	0.0296
8	14	20148103	20404281	-0.1863
8	14	20444164	41469306	-0.0078
8	14	41623577	41623629	0.7497
8	14	41623854	62229059	-0.0136
8	14	62229147	62229171	-0.3671
8	14	62229330	89148974	-0.0016
8	14	89254566	89290726	-0.1546
8	14	89290791	107284280	0.0108
8	15	20101612	102520452	-0.0022
8	16	60438	212464	0.0252
8	16	214776	214970	-0.9984
8	16	215002	90238222	0.0121
8	17	5999	78808570	0.0071
8	17	78809403	78809873	0.8102
8	17	78811536	81060149	0.0223
8	18	11231	78007841	-0.0039
8	19	70880	10172825	0.0168
8	19	10172841	10172899	0.4519
8	19	10174041	40368830	0.0066
8	19	40372977	40375973	-0.4237
8	19	40377434	43271058	0.0109
8	19	43271112	43531770	-0.2484
8	19	43531821	46389466	0.0088
8	19	46389504	46389521	-1.2923
8	19	46389574	59095508	0.006
8	20	67000	62960200	0.0075
8	21	10882029	48091011	0.0057
8	22	16123266	24345907	0.0117
8	22	24348715	24384525	0.4761
8	22	24400408	51225561	0.0127
ID	chrom	loc.start	loc.end	seg,mean
9	1	15865	2415221	-0.0159
9	1	2415344	2415453	0.5936
9	1	2415965	152769896	-0.0011
9	1	152770502	152777382	-0.9923
9	1	152778580	171771709	0.0019
9	1	171787181	171807195	0.5508
9	1	171809804	200703859	0.0145
9	1	200707086	200708027	-0.4965
9	1	200708096	249212500	-0.0023
9	2	45264	108537367	0.0023
9	2	108537568	108537774	-0.8863
9	2	108537789	112811810	-0.0022
9	2	112811924	112814452	0.1609
9	2	112816903	114260142	-0.0004
9	2	114260766	114261270	1.1965
9	2	114261369	122288288	-0.0021
9	2	122288370	122288388	-0.398
9	2	122288478	243035414	0.0044
9	3	114243	44803071	0.0039
9	3	44803084	44803129	-1.3134
9	3	44803154	100428140	0.0033
9	3	100428145	100428147	-0.4451
9	3	100428172	113464438	0.0155
9	3	113464879	113492074	0.1995
9	3	113502832	197517962	0.0079
9	3	197517984	197518007	-0.6553
9	3	197518017	197896800	0.0104
9	4	11068	155702172	0.0085
9	4	155702220	155703138	-0.2362
9	4	155703429	191016112	0.0149
9	5	12322	78191385	0.0046
9	5	78202845	78224071	-0.5051
9	5	78277492	78985495	0.0052
9	5	78985562	78986160	-0.2612
9	5	79040203	140097950	0.0154
9	5	140098174	140098496	-0.3679
9	5	140105089	140554081	0.0342
9	5	140554610	140557256	-0.4089
9	5	140557583	180375511	-0.0032
9	5	180396687	180408785	-1.0642
9	5	180408809	180876320	0.001
9	6	148112	31275881	0.0056
9	6	31276664	31276669	-2.3631
9	6	31321433	74363775	-0.0057
9	6	74363879	74363888	-0.6435
9	6	74363913	171036378	0.0085
9	7	31006	73256925	-0.0056
9	7	73257045	73257083	0.5321
9	7	73258222	75957040	-0.0021
9	7	75957061	75957202	-0.4649
9	7	75957376	159127977	0.0009
9	8	29111	11973495	-0.0182
9	8	11977206	12027122	-0.25
9	8	12030155	12206841	0.1751
9	8	12216892	19674196	0.0069
9	8	19674705	19674713	-0.4123
9	8	19674775	146280537	0.0014
9	9	11410	115833890	0.0074
9	9	115835613	115835616	0.901
9	9	115837453	141111396	-0.0118
9	10	91802	69835125	-0.0002
9	10	69835215	69835323	0.5874
9	10	69838818	71389896	0.0148
9	10	71389949	71389959	-0.452
9	10	71390173	135121916	-0.0057
9	10	135122020	135122788	0.3677
9	10	135122794	135524081	-0.0163
9	11	123899	134945848	-0.0016
9	12	148077	102456487	0.0104
9	12	102457300	102459329	0.43
9	12	102506848	113229534	0.0036
9	12	113229582	113229584	0.5916
9	12	113229617	133779169	-0.0094
9	13	19060404	115092495	0.0021
9	14	19109438	41469306	0.0146
9	14	41623577	41623629	-1.2786
9	14	41623854	107284280	-0.0005
9	15	20101612	30489014	-0.0157
9	15	30511386	30700112	-0.2188
9	15	30763199	34671426	0.0044
9	15	34700272	34817982	-0.29
9	15	34872733	102520452	0.0017
9	16	60438	1305718	-0.0257
9	16	1306340	1306346	-1.0514
9	16	1306872	90238222	-0.0079
9	17	5999	55038442	0
9	17	55038508	55038524	-0.8878
9	17	55038611	78808570	-0.0047
9	17	78809403	78809873	-0.5616
9	17	78811536	81060149	-0.0187
9	18	11231	78007841	0.0062
9	19	70880	53289933	0.0027
9	19	53290079	53290102	-1.5347
9	19	53290126	55249794	0.0159
9	19	55257560	55281274	-0.2863
9	19	55282146	59095508	0.0012
9	20	67000	62960200	-0.0004
9	21	10882029	48091011	-0.0041
9	22	16123266	24345907	-0.0111
9	22	24348715	24384525	0.3975
9	22	24400408	51225561	-0.0056
ID	chrom	loc.start	loc.end	seg,mean
10	1	15865	1916718	0.0002
10	1	1916894	1917911	-0.6149
10	1	1920339	13736832	0.0107
10	1	13737234	13737267	-0.8049
10	1	13796840	101360436	-0.0027
10	1	101360652	101360669	-0.4432
10	1	101360775	121461578	-0.007
10	1	121467175	121472061	-0.584
10	1	121472892	152769896	-0.0037
10	1	152770502	152777382	0.5303
10	1	152778580	155200357	-0.0027
10	1	155202674	155202685	-0.7032
10	1	155208775	171771709	0.0027
10	1	171787181	171807195	0.7547
10	1	171809804	180991969	0.0009
10	1	180992098	180992117	-0.4653
10	1	180993237	249212500	0.0046
10	2	45264	114260142	0.0023
10	2	114260766	114261270	0.8121
10	2	114261369	243035414	0.0051
10	3	114243	17375660	0.0064
10	3	17583522	17686199	-0.3367
10	3	17742212	38496096	-0.0015
10	3	38496311	38496316	-0.6661
10	3	38496325	44803071	0.0004
10	3	44803084	44803129	1.0689
10	3	44803154	129761854	0.0023
10	3	129799733	129804842	0.4114
10	3	129822854	197896800	-0.0008
10	4	11068	191016112	0.0029
10	5	12322	679849	0.006
10	5	680438	751299	-0.1714
10	5	751320	180375511	0.0016
10	5	180396687	180408785	-1.2798
10	5	180408809	180876320	-0.0249
10	6	148112	29834495	0.0001
10	6	29838356	29908891	-0.3101
10	6	29908976	30039025	0.0135
10	6	30039027	30039442	0.2224
10	6	30039466	31148552	0.0057
10	6	31148606	31148612	-1.3445
10	6	31148657	32525979	0.0016
10	6	32526342	32548402	-0.2874
10	6	32548589	32632995	0.0006
10	6	32633015	32633163	-0.4497
10	6	32634009	171036378	0.0053
10	7	31006	25019751	0.0098
10	7	25019893	25019943	-0.9844
10	7	25020404	159127977	0.0047
10	8	29111	8085544	0.0242
10	8	8085844	8086607	-0.4206
10	8	8086686	146280537	0.0051
10	9	11410	115833890	-0.0074
10	9	115835613	115841081	0.5027
10	9	115841105	141111396	-0.0015
10	10	91802	1367612	0.0212
10	10	1369114	1369823	-0.7914
10	10	1370331	12999550	0.0171
10	10	12999599	12999618	0.6406
10	10	13002582	135122020	0.002
10	10	135122230	135122237	0.5198
10	10	135122309	135524081	-0.0076
10	11	123899	128080305	-0.0001
10	11	128105129	128107248	-0.6659
10	11	128116707	134945848	0.0146
10	12	148077	54402443	-0.0021
10	12	54402697	54402717	0.2547
10	12	54402888	133779169	0.0009
10	13	19060404	115092495	0.0071
10	14	19109438	19602855	-0.0261
10	14	19613906	19614556	-0.5936
10	14	19614829	41469306	-0.0107
10	14	41623577	41623629	0.7511
10	14	41623854	107284280	0.0027
10	15	20101612	63334436	0.0021
10	15	63334506	63336009	-0.2575
10	15	63337352	102520452	0.0004
10	16	60438	1305718	0.0076
10	16	1306340	1306346	-1.0222
10	16	1306872	15951195	0.0032
10	16	15951224	15951230	-0.7006
10	16	15951809	85966425	0.0007
10	16	85966435	85966545	-0.5275
10	16	85968253	90238222	0.0115
10	17	5999	18378879	-0.0037
10	17	18379129	18432149	-0.3512
10	17	18473054	18965556	0.0091
10	17	18965580	19140659	-0.2047
10	17	19140672	78808570	-0.0039
10	17	78809403	78809873	0.8206
10	17	78811536	81060149	0.0098
10	18	11231	78007841	-0.0071
10	19	70880	6737431	-0.0066
10	19	6737490	6737494	0.8522
10	19	6737662	10172825	-0.012
10	19	10172841	10172899	0.4678
10	19	10174041	19431283	-0.0174
10	19	19431379	19431407	-0.3584
10	19	19431446	59095508	-0.0138
10	20	67000	62960200	-0.0062
10	21	10882029	48091011	0.0017
10	22	16123266	24345907	-0.0073
10	22	24348715	24400408	0.3188
10	22	24402088	39377930	-0.0076
10	22	39378224	39378283	-0.4863
10	22	39378425	51225561	-0.0037
ID	chrom	loc.start	loc.end	seg,mean
11	1	15865	13736832	-0.0001
11	1	13737234	13737267	-0.9341
11	1	13796840	31192015	-0.0037
11	1	31192151	31192165	-0.4696
11	1	31192334	110214317	-0.0016
11	1	110230252	110254854	0.2098
11	1	110254896	152506842	0.002
11	1	152506922	152553244	-0.4385
11	1	152595322	152769896	-0.0054
11	1	152770502	152777382	0.3466
11	1	152778580	180991969	-0.0021
11	1	180992098	180992117	-0.6821
11	1	180993237	248738984	-0.0001
11	1	248753499	248791716	-0.4128
11	1	248814059	249212500	-0.0024
11	2	45264	243035414	0.0004
11	3	114243	197896800	-0.0004
11	4	11068	132655659	0.001
11	4	132660385	132686116	0.1602
11	4	132686909	191016112	0.0005
11	5	12322	140221364	0.0019
11	5	140222253	140237879	-0.2398
11	5	140240593	140554081	0.0061
11	5	140554610	140557256	-0.4589
11	5	140557583	180375511	-0.0006
11	5	180396687	180408809	0.5264
11	5	180428536	180876320	-0.0017
11	6	148112	290800	-0.0132
11	6	291687	293331	0.5409
11	6	296538	171036378	0.0006
11	7	31006	25019751	0.0028
11	7	25019893	25019943	-0.7649
11	7	25020404	159127977	0.0016
11	8	29111	7191953	0.0032
11	8	7192145	7396283	-0.2145
11	8	7404876	7651924	0.031
11	8	7657022	7754234	-0.2188
11	8	7812741	8085544	-0.0052
11	8	8085844	8086686	0.2161
11	8	8090460	11977206	0.0007
11	8	11986501	11997496	-0.4765
11	8	12027122	75898238	0.0003
11	8	75946479	76323405	0.1651
11	8	76452152	124780746	0.0002
11	8	124780837	124780849	-0.3219
11	8	124780851	146280537	-0.001
11	9	11410	141111396	-0.0017
11	10	91802	1102609	0.0069
11	10	1102611	1102726	-0.1591
11	10	1102835	1204214	0.0088
11	10	1205222	1205942	0.1881
11	10	1206555	2563644	0.006
11	10	2563965	2564866	0.6484
11	10	2565606	12999550	0.0049
11	10	12999599	12999618	0.6043
11	10	13002582	13142132	-0.0149
11	10	13142334	13143470	-0.2879
11	10	13146136	38738647	0.0032
11	10	38738941	38739885	-0.2261
11	10	38740029	69835125	-0.0012
11	10	69835215	69835323	0.2475
11	10	69838818	71389896	0.0023
11	10	71389949	71389956	0.5686
11	10	71389959	135524081	-0.0002
11	11	123899	1083236	0.0044
11	11	1083299	1086863	-0.2135
11	11	1087601	18887821	0.0013
11	11	18955977	18956283	-0.8361
11	11	18956637	58810187	-0.0015
11	11	58825714	58833356	0.2679
11	11	58866721	134945848	-0.0015
11	12	148077	9436329	-0.002
11	12	9436616	9437009	0.5519
11	12	9439804	133009754	0.0003
11	12	133009863	133009956	-0.6026
11	12	133010684	133779169	-0.0018
11	13	19060404	115092495	0.002
11	14	19109438	41469306	-0.0013
11	14	41623577	41623629	0.4442
11	14	41623854	73959688	0.002
11	14	74001118	74034893	-0.1447
11	14	74035398	107284280	0.0011
11	15	20101612	20834869	0.0737
11	15	20892987	22560430	0.1884
11	15	22560713	34671426	0.0015
11	15	34700272	34817982	-0.3397
11	15	34872733	102520452	-0.0015
11	16	60438	1305718	0.0013
11	16	1306340	1306346	0.5245
11	16	1306872	32214185	0.0002
11	16	32252365	33779917	0.1513
11	16	33781365	90238222	-0.0002
11	17	5999	10101581	-0.0013
11	17	10102232	10102237	-0.5014
11	17	10102439	18326064	-0.002
11	17	18378879	18432149	0.1825
11	17	18473054	19014466	0.0047
11	17	19015401	19030144	0.5068
11	17	19030146	61851352	-0.0004
11	17	61851458	61851465	-0.4822
11	17	61851480	71188803	-0.0003
11	17	71189054	71189066	0.4255
11	17	71189068	78808570	-0.001
11	17	78809403	78809873	-0.6027
11	17	78811536	81060149	0.0034
11	18	11231	77568018	0.0025
11	18	77568900	77568902	0.4429
11	18	77569776	78007841	-0.0125
11	19	70880	59095508	-0.0003
11	20	67000	62960200	-0.0019
11	21	10882029	48091011	0.0019
11	22	16123266	20310676	-0.0068
11	22	20342520	20485872	0.1939
11	22	20502597	24373054	-0.0023
11	22	24373322	24373618	0.3255
11	22	24374012	51225561	-0.0025
ID	chrom	loc.start	loc.end	seg,mean
12	1	15865	2415221	0.0067
12	1	2415344	2415453	0.708
12	1	2415965	47799348	0.0108
12	1	47799633	47799638	-0.4902
12	1	47799827	54355510	0.0005
12	1	54355560	54355695	-0.1526
12	1	54355906	54358446	-0.4418
12	1	54358862	76251636	-0.0039
12	1	76251752	76251976	0.1697
12	1	76252117	85462857	-0.0278
12	1	85462885	85462892	-0.5526
12	1	85462939	120838718	-0.0064
12	1	120839380	120906506	0.1606
12	1	120907826	148000579	-0.0091
12	1	148000763	148025634	-0.797
12	1	148176490	148931788	0.0369
12	1	148933698	149212246	0.431
12	1	149223316	149403965	0.2194
12	1	149510892	152769896	0.0076
12	1	152770502	152777382	0.588
12	1	152778580	161410459	0.0081
12	1	161410551	161427101	-0.3726
12	1	161429270	182361500	-0.0024
12	1	182361507	182361509	0.5904
12	1	182361528	249212500	-0.0026
12	2	45264	243035414	-0.0029
12	3	114243	44803071	-0.0029
12	3	44803084	44803129	0.6933
12	3	44803154	129761854	-0.0022
12	3	129799733	129804842	0.3439
12	3	129822854	157102022	-0.0096
12	3	157122686	157152139	0.3862
12	3	157153636	157823817	-0.0179
12	3	157824148	157824209	-0.2744
12	3	157824217	197896800	-0.0085
12	4	11068	187109237	-0.0113
12	4	187111841	187111853	0.5833
12	4	187111940	191016112	-0.0199
12	5	12322	646835	-0.0026
12	5	649884	650104	-0.7225
12	5	653442	132175434	-0.012
12	5	132198209	132232586	0.2043
12	5	132271449	140554081	0.0028
12	5	140554610	140557627	-0.4422
12	5	140559576	179061795	0.0031
12	5	179071604	179071901	0.4532
12	5	179072247	180237008	0.0029
12	5	180237085	180237222	-0.2802
12	5	180237311	180375511	-0.0037
12	5	180396687	180428536	0.4722
12	5	180433174	180876320	0.0057
12	6	148112	288505	0.0296
12	6	290800	373609	-0.1354
12	6	379489	7390048	-0.0004
12	6	7390083	7390091	0.5185
12	6	7390136	29648381	-0.004
12	6	29648400	29649084	0.2039
12	6	29649807	29856235	0.0127
12	6	29856275	29856795	0.1982
12	6	29856938	29894141	0.071
12	6	29894152	29894248	0.508
12	6	29894253	31324684	0.0153
12	6	31324916	31325455	-0.2206
12	6	31325817	32632159	0.0159
12	6	32632331	32632338	0.704
12	6	32632568	32632937	-0.18
12	6	32632961	32634508	0.3109
12	6	32635871	74363775	0.0005
12	6	74363879	74363888	-0.61
12	6	74363913	171036378	-0.0101
12	7	31006	53879377	0.0004
12	7	53879422	53879728	-0.4851
12	7	54074755	73256925	-0.0027
12	7	73257045	73257083	-0.4361
12	7	73258222	127776461	-0.0087
12	7	127779130	127792057	-0.2816
12	7	127792165	128663808	0.0022
12	7	128691977	128692716	-0.4839
12	7	128693986	159127977	0.0004
12	8	29111	82754387	-0.006
12	8	82754475	82754900	0.6156
12	8	82755304	124780746	-0.015
12	8	124780837	124780851	-0.3454
12	8	124780911	146280537	0.0044
12	9	11410	115833890	-0.0031
12	9	115835613	115841081	-0.7013
12	9	115841105	141111396	0.0088
12	10	91802	69831374	-0.0072
12	10	69834353	69835323	0.185
12	10	69838818	135122020	0.0028
12	10	135122230	135122752	-1.1391
12	10	135122788	135524081	0.0049
12	11	123899	1083236	0.0082
12	11	1083299	1086863	-0.2172
12	11	1087601	2058046	0.0068
12	11	2064747	2093768	-0.1297
12	11	2098414	18887821	0
12	11	18955977	18957755	-0.5631
12	11	18978157	58810187	-0.0009
12	11	58825714	58833356	0.1345
12	11	58866721	64546304	0.0081
12	11	64546351	64546370	-0.3954
12	11	64546383	70256681	0.01
12	11	70257035	70257059	0.4654
12	11	70257149	131780094	-0.0002
12	11	131780276	131780334	-0.4396
12	11	131780353	134945848	0.0042
12	12	148077	12503307	0.0016
12	12	12503455	12503457	-0.5524
12	12	12503544	54355087	-0.0036
12	12	54355460	54355476	-0.6442
12	12	54355528	54402443	0.033
12	12	54402697	54402717	-0.3068
12	12	54402888	133779169	0.0016
12	13	19060404	115092495	-0.0081
12	14	19109438	73959688	-0.0033
12	14	74001118	74008259	-0.3033
12	14	74026160	107062160	0.0036
12	14	107095027	107186057	-0.4856
12	14	107210810	107284280	-0.0119
12	15	20101612	22095674	-0.0304
12	15	22302557	22560713	0.2848
12	15	22646692	102520452	-0.0003
12	16	60438	83967363	0.0061
12	16	83967545	83968316	-0.8476
12	16	83968360	88263144	0.0124
12	16	88263261	88263263	-0.7099
12	16	88263686	90238222	0.0098
12	17	5999	81060149	0.0074
12	18	11231	74960699	-0.0074
12	18	74960996	74961002	-0.6404
12	18	74961078	78007841	-0.0052
12	19	70880	6737431	0.0087
12	19	6737490	6737494	1.3615
12	19	6737662	33622911	0.0107
12	19	33622953	33622961	-0.4033
12	19	33623072	43271112	0.0117
12	19	43355659	43531770	-0.2307
12	19	43531821	59095508	0.0074
12	20	67000	62960200	0.0056
12	21	10882029	48091011	-0.0019
12	22	16123266	24345907	0.0049
12	22	24348715	24384525	-0.7687
12	22	24400408	51225561	0.0095
ID	chrom	loc.start	loc.end	seg,mean
13	1	15865	12908473	0.0047
13	1	12908861	12919079	-1.1156
13	1	12939180	228744111	0.0015
13	1	228756711	228756714	-1.4662
13	1	228773464	249212500	-0.0034
13	2	45264	243035414	-0.0017
13	3	114243	195395398	-0.002
13	3	195398459	195448197	-0.1547
13	3	195450060	196318719	0.0071
13	3	196325238	196325552	-0.5402
13	3	196326093	197896800	-0.0101
13	4	11068	4139592	0.0014
13	4	4139646	4149928	-0.2708
13	4	4162205	191016112	-0.0046
13	5	12322	140554081	-0.0017
13	5	140554610	140557627	-0.412
13	5	140559576	180397910	0.0014
13	5	180408785	180428536	0.5574
13	5	180433174	180876320	-0.0075
13	6	148112	290800	-0.0037
13	6	291687	296538	-0.1794
13	6	297974	29648381	0.0019
13	6	29648400	29648901	0.2356
13	6	29649024	29894197	-0.004
13	6	29894228	29894248	-0.834
13	6	29894253	31237029	0.0062
13	6	31237199	31237664	-0.4541
13	6	31237722	31324512	-0.0337
13	6	31324565	31364942	0.1386
13	6	31364999	31367541	-0.3965
13	6	31367696	31382931	-0.1866
13	6	31409319	31458944	-0.3834
13	6	31459811	32032709	0.0098
13	6	32032716	32032728	0.6093
13	6	32032787	171036378	0.0008
13	7	31006	32535009	0.0044
13	7	32535165	32535189	-0.5288
13	7	32535387	63212981	-0.0006
13	7	63213454	63225198	0.2185
13	7	63225776	73256925	-0.0002
13	7	73257045	73257083	0.6246
13	7	73258222	76112322	-0.0017
13	7	76126629	76149509	-0.3433
13	7	76163353	76610059	-0.1852
13	7	76610371	102196182	-0.0009
13	7	102212892	102259241	-0.4192
13	7	102279588	159127977	0.0008
13	8	29111	146280537	-0.0005
13	9	11410	115833890	-0.0019
13	9	115835613	115835616	0.7386
13	9	115837453	141111396	0.0027
13	10	91802	368451	0.0062
13	10	368911	369137	-0.4179
13	10	369977	13142132	0.0035
13	10	13142334	13143470	-0.3628
13	10	13146136	71389896	-0.0035
13	10	71389949	71389956	0.4702
13	10	71389959	135524081	0.0011
13	11	123899	18887821	0.0008
13	11	18955977	18956283	-0.569
13	11	18956637	134945848	0.001
13	12	148077	31257362	0
13	12	31270326	31412980	0.169
13	12	31423331	54402443	-0.0001
13	12	54402697	54402717	-0.3526
13	12	54402888	130604047	0.0017
13	12	130604221	130604991	0.3043
13	12	130605112	130965963	0.0168
13	12	130968391	130968614	0.4159
13	12	130976260	133779169	0.0063
13	13	19060404	95248771	-0.0055
13	13	95248882	95253676	-0.2598
13	13	95253900	98875360	-0.0029
13	13	98885809	98892233	-0.4143
13	13	98893039	115092495	0.0031
13	14	19109438	41469306	0.0001
13	14	41623577	41623854	0.3557
13	14	41684218	74002584	-0.0022
13	14	74003780	74040239	0.1922
13	14	74056265	107284280	0.0009
13	15	20101612	24509693	-0.0069
13	15	24668586	24802619	0.2461
13	15	24802629	102520452	-0.001
13	16	60438	90238222	0.0028
13	17	5999	34597546	0.0027
13	17	34599556	34626096	-0.6378
13	17	34639327	62340561	0.0041
13	17	62340717	62340732	-0.5171
13	17	62340798	78808570	0.004
13	17	78809403	78809873	-0.8289
13	17	78811536	81060149	0.0065
13	18	11231	78007841	-0.0043
13	19	70880	59095508	0.0047
13	20	67000	2633324	-0.0058
13	20	2633340	2633362	0.5266
13	20	2633605	62388922	0.0011
13	20	62394902	62402068	-0.2847
13	20	62402415	62905237	0.0069
13	20	62947519	62960200	-0.1729
13	21	10882029	48091011	0.0006
13	22	16123266	24345907	0.0025
13	22	24348715	24384525	0.4668
13	22	24400408	39354115	0.0023
13	22	39377790	39378425	0.2289
13	22	39381429	41214936	0.0074
13	22	41215243	41215569	-0.2719
13	22	41215824	41940355	0.0038
13	22	41940476	41940697	-0.216
13	22	41940855	51225561	0.0028
ID	chrom	loc.start	loc.end	seg,mean
14	1	15865	17012728	0.0058
14	1	17014799	17085863	-0.2416
14	1	17086061	182361500	0.0034
14	1	182361507	182361509	-0.5924
14	1	182361528	249212500	-0.005
14	2	45264	132202004	-0.0016
14	2	132202427	132202537	0.3664
14	2	132202958	243035414	-0.0044
14	3	114243	197896800	-0.0039
14	4	11068	191016112	-0.0075
14	5	12322	140554081	-0.0056
14	5	140554610	140557256	0.5838
14	5	140557583	180375511	0.0005
14	5	180396687	180428536	0.5173
14	5	180433174	180876320	-0.0055
14	6	148112	236559	0.0005
14	6	288505	293331	-0.1508
14	6	296538	30954872	0.004
14	6	30954962	30955142	-0.3667
14	6	30955358	31126173	0.0003
14	6	31126267	31126284	0.4205
14	6	31126345	31148552	-0.0091
14	6	31148606	31148612	0.8277
14	6	31148657	31235956	0.0477
14	6	31237013	31239767	0.4365
14	6	31239910	31461728	0.1039
14	6	31461748	31461999	0.4743
14	6	31462038	171036378	-0.0032
14	7	31006	6897617	0.0044
14	7	6909121	6916089	-0.2215
14	7	6974270	62809321	-0.0081
14	7	62809373	62859493	-0.9367
14	7	62859557	159127977	-0.0027
14	8	29111	6932793	-0.0119
14	8	6940591	6940624	-0.8879
14	8	6940702	11973495	0.0057
14	8	11977206	12052924	0.1708
14	8	12206841	82754387	-0.0059
14	8	82754475	82754900	0.3146
14	8	82755304	146280537	-0.0046
14	9	11410	141111396	0.0031
14	10	91802	135122020	-0.0016
14	10	135122230	135122752	0.3213
14	10	135122788	135524081	-0.0042
14	11	123899	58806952	0
14	11	58810187	58833356	-0.1571
14	11	58866721	60968987	-0.0069
14	11	60970290	61049520	-0.1954
14	11	61058953	128732986	0.003
14	11	128736844	128746307	-0.1477
14	11	128746438	134945848	0
14	12	148077	110011641	-0.0011
14	12	110012484	110012500	-0.4873
14	12	110013740	133779169	0.0051
14	13	19060404	23270850	-0.0086
14	13	23273266	23310675	-0.1805
14	13	23332625	115092495	-0.0078
14	14	19109438	20148125	-0.0382
14	14	20215980	20403845	-0.2409
14	14	20404281	41469306	0.0037
14	14	41623577	41623629	0.5286
14	14	41623854	107284280	0.001
14	15	20101612	30489014	-0.0114
14	15	30511386	30763199	-0.197
14	15	30763484	102520452	0.0021
14	16	60438	90238222	0.0046
14	17	5999	18936298	0.007
14	17	18951025	19030144	0.275
14	17	19030146	78808570	0.0073
14	17	78809403	78809873	0.5852
14	17	78811536	81060149	0.0034
14	18	11231	78007841	-0.003
14	19	70880	43271112	0.0131
14	19	43355659	43531821	-0.2785
14	19	43569592	51107558	0.0156
14	19	51107781	51108274	-0.3332
14	19	51111137	59095508	0.0111
14	20	67000	2633324	0.0094
14	20	2633340	2633362	0.5597
14	20	2633605	62151131	0.0085
14	20	62151993	62152128	-0.3123
14	20	62152146	62960200	0.0055
14	21	10882029	48091011	-0.0023
14	22	16123266	24345907	0.0037
14	22	24348715	24384525	0.2038
14	22	24400408	51225561	0.0082
ID	chrom	loc.start	loc.end	seg,mean
15	1	15865	249212500	0.0008
15	2	45264	114260142	-0.0021
15	2	114260766	114261270	1.0304
15	2	114261369	243035414	-0.0025
15	3	114243	44803071	-0.0011
15	3	44803084	44803129	0.6224
15	3	44803154	128840257	-0.0021
15	3	128840619	128840829	0.186
15	3	128840836	197896800	-0.005
15	4	11068	46391532	0.0032
15	4	46391694	46391737	-0.4967
15	4	46391803	68236744	-0.0034
15	4	68265207	68265891	-0.4416
15	4	68303581	191016112	-0.0108
15	5	12322	1003069	0.0143
15	5	1003099	1003134	-0.5559
15	5	1003504	140091102	-0.0068
15	5	140097950	140098496	-0.2871
15	5	140105089	140554081	-0.0135
15	5	140554610	140557256	0.5534
15	5	140557583	180375511	-0.0013
15	5	180396687	180428536	0.5736
15	5	180433174	180591342	0.0235
15	5	180591594	180596373	-0.2525
15	5	180596477	180670944	0.0158
15	5	180670960	180671165	-0.35
15	5	180671201	180876320	0.0214
15	6	148112	236559	0.0145
15	6	288505	293331	-0.1568
15	6	296538	379514	-0.3496
15	6	379581	32489553	-0.003
15	6	32489555	32489750	-0.7698
15	6	32489801	32526702	0.0102
15	6	32528968	32551749	-0.2878
15	6	32551888	171036378	-0.0057
15	7	31006	38350464	0.0022
15	7	38350921	38351468	0.2382
15	7	38355100	63014468	-0.0039
15	7	63016648	63016835	0.6196
15	7	63018494	76112322	0.0097
15	7	76126629	76610059	-0.2422
15	7	76610371	101007072	-0.003
15	7	101007190	101007442	0.355
15	7	101007603	102134668	0.0032
15	7	102136524	102327236	-0.1879
15	7	102329146	143888190	-0.0068
15	7	143893948	143895753	0.5323
15	7	143956670	158058752	0.001
15	7	158059142	158059179	0.4374
15	7	158059396	159127977	-0.0084
15	8	29111	11977206	0.0007
15	8	11986501	11997496	0.2896
15	8	12027122	48656349	-0.0009
15	8	48673669	48826017	0.1691
15	8	48854968	146280537	-0.0028
15	9	11410	115833890	0.0004
15	9	115835613	115851947	-0.8277
15	9	115852992	141111396	0.0111
15	10	91802	135524081	-0.0005
15	11	123899	58810187	0.0008
15	11	58825714	58833356	0.209
15	11	58866721	82782929	0.0061
15	11	82782984	82783003	-0.5218
15	11	82783039	117667862	-0.0091
15	11	117668035	117668042	-0.2742
15	11	117668140	134601111	-0.0047
15	11	134603744	134605862	-0.3766
15	11	134607652	134945848	-0.0117
15	12	148077	176189	0.152
15	12	176424	7053030	0.0006
15	12	7053164	7053170	-0.5933
15	12	7053223	54402443	-0.0016
15	12	54402697	54402717	-0.803
15	12	54402888	133779169	-0.0019
15	13	19060404	107220630	-0.0078
15	13	107220655	107220663	0.4724
15	13	107220725	112815961	-0.0036
15	13	112817661	112818596	0.3711
15	13	112818938	115092495	0.0021
15	14	19109438	107284280	0.0017
15	15	20101612	102520452	-0.0001
15	16	60438	90238222	0.0047
15	17	5999	18965556	0.0046
15	17	18965580	19140637	-0.2181
15	17	19140653	61851352	0.0032
15	17	61851458	61851465	0.5568
15	17	61851480	78809698	0.0057
15	17	78809852	78809873	-0.9915
15	17	78811536	81060149	0.0118
15	18	11231	10589169	0.0076
15	18	10589357	10589360	-0.5093
15	18	10590639	78007841	0.0031
15	19	70880	55266305	0.0112
15	19	55280577	55327234	-0.3716
15	19	55327711	59095508	0.0143
15	20	67000	62960200	0.0068
15	21	10882029	48091011	0.0052
15	22	16123266	24345907	0.0185
15	22	24348715	24384525	0.4763
15	22	24400408	51225561	0.0117
ID	chrom	loc.start	loc.end	seg,mean
16	1	15865	249212500	-0.0005
16	2	45264	130954705	0.0041
16	2	130955686	130956219	0.2706
16	2	130956255	132202004	0.0023
16	2	132202427	132203745	0.3196
16	2	132205917	243035414	0.0078
16	3	114243	11033866	0.0028
16	3	11033977	11034345	-0.2083
16	3	11034501	128840257	0.0042
16	3	128840619	128840692	-0.2502
16	3	128840773	129800495	-0.0031
16	3	129800573	129804842	0.6602
16	3	129822854	197896800	0.0081
16	4	11068	4147643	-0.0046
16	4	4147958	4149928	-0.8066
16	4	4162205	191016112	0.0113
16	5	12322	82243	0.0309
16	5	83429	84730	-0.5345
16	5	85981	1178277	0.0036
16	5	1178961	1180364	-0.2883
16	5	1183037	140554081	0.008
16	5	140554610	140557256	0.3523
16	5	140557583	180375511	0.0057
16	5	180396687	180408809	0.5811
16	5	180428536	180876320	-0.0112
16	6	148112	236559	-0.0167
16	6	288505	293331	0.3589
16	6	296538	5004202	0.006
16	6	5004368	5004418	-1.1279
16	6	5004505	31324512	0.0059
16	6	31324565	31334836	0.1913
16	6	31347802	31588317	-0.0269
16	6	31588427	31588850	-0.193
16	6	31588874	31649638	-0.0039
16	6	31649728	31651362	-0.1577
16	6	31652845	31866825	-0.0056
16	6	31867698	31867873	0.1725
16	6	31867906	32121758	0.0045
16	6	32121830	32121841	-0.2562
16	6	32121843	32522535	0.0164
16	6	32525813	32557404	-0.1808
16	6	32557419	33084549	0.0144
16	6	33084554	33084608	-0.7681
16	6	33084624	33244178	-0.0052
16	6	33244709	33244755	-0.2357
16	6	33244775	35754796	-0.0038
16	6	35754906	35766051	0.1652
16	6	35770021	74363775	0.0053
16	6	74363879	74363888	-0.8708
16	6	74363913	171036378	0.0104
16	7	31006	159127977	0.0055
16	8	29111	8085973	0.0194
16	8	8086144	8086146	0.8269
16	8	8086607	139165052	0.0099
16	8	139165563	139165568	0.5554
16	8	139178138	146280537	-0.0066
16	9	11410	115833890	-0.0007
16	9	115835613	115835616	-0.6078
16	9	115837453	141111396	-0.0104
16	10	91802	38739506	0.0096
16	10	38739819	38739885	-0.3501
16	10	38740029	69835125	0.0126
16	10	69835215	69835323	-0.5839
16	10	69838818	102756165	-0.0008
16	10	102756314	102757887	-0.1712
16	10	102758403	132908294	0.0008
16	10	132909113	132912784	-0.2117
16	10	132912961	135524081	-0.0001
16	11	123899	11643697	-0.0026
16	11	11643754	11643760	-0.3215
16	11	11643816	58810187	0.007
16	11	58825714	58833356	0.2529
16	11	58866721	118901842	-0.0042
16	11	118902213	118902351	-0.5418
16	11	118905083	123940679	0.0055
16	11	123947157	123947230	-0.3164
16	11	123984775	134945848	0.0102
16	12	148077	113229392	0.0011
16	12	113229465	113229584	-0.5867
16	12	113229617	132879809	-0.0003
16	12	132879967	132880790	-0.3847
16	12	132882028	133066054	0.0103
16	12	133066056	133066754	-0.145
16	12	133066762	133779169	-0.0003
16	13	19060404	115092495	0.0112
16	14	19109438	20148125	0.069
16	14	20215980	20404281	0.446
16	14	20444164	73959688	0
16	14	74001118	74008259	0.4466
16	14	74026160	107284280	-0.0005
16	15	20101612	32569053	0.0205
16	15	32605028	32639426	-0.234
16	15	32639549	34727209	-0.0018
16	15	34729026	34817982	-0.2803
16	15	34872733	102520452	-0.0002
16	16	60438	90238222	-0.0036
16	17	5999	13927240	-0.0075
16	17	13927617	13927815	-0.3127
16	17	13941263	18925318	0.0004
16	17	18936298	19015961	-0.2289
16	17	19030144	44344931	-0.0079
16	17	44347643	44790735	0.1884
16	17	44799470	45177378	0.0011
16	17	45177429	45177431	-0.5047
16	17	45177598	78808570	-0.0064
16	17	78809403	78809873	0.566
16	17	78811536	79905176	-0.0084
16	17	79905219	79905263	0.5131
16	17	79905319	81060149	-0.0055
16	18	11231	78007841	-0.001
16	19	70880	59095508	-0.0158
16	20	67000	62960200	-0.0089
16	21	10882029	48091011	0.0026
16	22	16123266	22311698	-0.0126
16	22	22312957	22465502	-0.3715
16	22	22469147	22577105	-0.1937
16	22	22577791	24373011	-0.0004
16	22	24373054	24381773	0.7539
16	22	24384525	45134895	-0.0137
16	22	45148218	45148229	-0.4417
16	22	45148285	51225561	-0.0079
ID	chrom	loc.start	loc.end	seg,mean
17	1	15865	1916718	-0.0035
17	1	1916894	1917911	-0.6483
17	1	1920339	13736832	0.0058
17	1	13737234	13737267	-1.097
17	1	13796840	17193979	0.0072
17	1	17195765	17265457	0.1966
17	1	17265567	110214317	-0.0029
17	1	110230252	110254709	0.2381
17	1	110254828	114696946	0.001
17	1	114697032	114697113	-0.3333
17	1	114697352	143651192	0.0108
17	1	143663862	143664131	-0.4577
17	1	143667675	152769896	0.0008
17	1	152770502	152777382	0.6096
17	1	152778580	160068371	-0.0013
17	1	160068471	160068681	-0.2374
17	1	160068836	161563355	0.0087
17	1	161572679	161646918	0.2415
17	1	161647536	248738984	0.0055
17	1	248753499	248791716	-0.431
17	1	248814059	249212500	0.0037
17	2	45264	243035414	0.0042
17	3	114243	197896800	0.0029
17	4	11068	1366121	0.0066
17	4	1366463	1366662	-0.4856
17	4	1366826	7164855	0.0053
17	4	7184654	7187328	-0.4328
17	4	7191910	7742526	0.0109
17	4	7750448	7750489	-0.4981
17	4	7754366	132655659	0.0032
17	4	132660385	132684138	0.2574
17	4	132686116	191016112	0.0026
17	5	12322	180375511	0.0034
17	5	180396687	180408785	-1.036
17	5	180408809	180876320	-0.0167
17	6	148112	31324024	0.0043
17	6	31324227	31325455	-0.2355
17	6	31325817	32489801	0.0062
17	6	32489991	32490444	-1.8816
17	6	32491826	171036378	0.0041
17	7	31006	38294113	0.0052
17	7	38296393	38389659	-0.1877
17	7	38389685	159127977	0.0033
17	8	29111	2075209	0.0182
17	8	2075469	2078250	0.3147
17	8	2078387	7213999	0.0123
17	8	7216871	7396283	-0.376
17	8	7404876	7631923	-0.0125
17	8	7650102	7754234	-0.3625
17	8	7812741	8085844	-0.0554
17	8	8085946	8086146	-0.3603
17	8	8086607	11973223	0.006
17	8	11973495	11996937	-0.534
17	8	11997496	12052924	-0.1967
17	8	12206841	92114725	0.0013
17	8	92129661	92177481	-0.4571
17	8	92220385	141348605	0.0099
17	8	141348866	141349212	0.2721
17	8	141353043	141600316	-0.0026
17	8	141608316	141613380	0.2093
17	8	141619425	146280537	-0.0002
17	9	11410	141111396	-0.0009
17	10	91802	12999550	0.0124
17	10	12999599	12999618	0.7066
17	10	13002582	38738647	0.0015
17	10	38738941	38740029	-0.2816
17	10	38740319	50887212	0.0041
17	10	50887472	50887488	-0.6524
17	10	50887566	102756165	0.0014
17	10	102756314	102759759	-0.1336
17	10	102760724	135341025	0.0048
17	10	135341528	135343280	-0.2015
17	10	135344917	135524081	0.0467
17	11	123899	60968987	0.0029
17	11	60970290	61018691	-0.214
17	11	61025815	134945848	0.0012
17	12	148077	26985133	0.0064
17	12	26985181	26986279	-0.2299
17	12	26986502	113229465	-0.002
17	12	113229534	113229584	0.3449
17	12	113229617	133066069	0.0057
17	12	133066471	133066651	-0.1833
17	12	133066678	133779169	0.0082
17	13	19060404	91918752	0.0023
17	13	91999408	92001764	-0.1803
17	13	92001959	115092495	0.0091
17	14	19109438	20404281	-0.1741
17	14	20444164	22471111	0.0062
17	14	22538783	22963867	-0.195
17	14	22964913	41469306	-0.008
17	14	41623577	41623629	0.7488
17	14	41623854	107284280	0.0007
17	15	20101612	102520452	0.0016
17	16	60438	83967363	-0.0005
17	16	83967545	83968316	-1.0705
17	16	83968360	89883191	0.0074
17	16	89883212	89883240	-0.7396
17	16	89883253	90238222	0.0031
17	17	5999	78808570	-0.0019
17	17	78809403	78809873	-0.672
17	17	78811536	79905176	0
17	17	79905219	79905263	0.5279
17	17	79905319	81060149	0.0077
17	18	11231	78007841	-0.0067
17	19	70880	45874071	-0.0124
17	19	45874080	45874153	-0.587
17	19	45876157	53289933	-0.0089
17	19	53290079	53290102	-1.1477
17	19	53290126	59095508	-0.0081
17	20	67000	2633324	-0.0033
17	20	2633340	2633362	0.4696
17	20	2633605	62960200	-0.0051
17	21	10882029	42219193	-0.002
17	21	42219202	42219221	-0.8803
17	21	42219299	48091011	0.005
17	22	16123266	24373011	-0.0157
17	22	24373054	24373618	-1.5677
17	22	24374012	51225561	-0.0058
ID	chrom	loc.start	loc.end	seg,mean
18	1	15865	12908251	0.0055
18	1	12908455	12940599	0.3596
18	1	12944986	13736832	0.0627
18	1	13737234	13737267	-1.15
18	1	13796840	249212500	0.0005
18	2	45264	243035414	-0.0027
18	3	114243	129800495	-0.0025
18	3	129800573	129804842	0.4874
18	3	129822854	195345288	-0.0078
18	3	195346589	195476016	-0.145
18	3	195477778	195701118	0.0028
18	3	195703920	195724371	-0.175
18	3	195724401	197896800	0.0007
18	4	11068	191016112	-0.0057
18	5	12322	1594021	0.0057
18	5	1594282	1594863	0.3099
18	5	1595048	140554081	-0.0053
18	5	140554610	140557256	0.7192
18	5	140557583	140593332	0.0088
18	5	140593443	140594406	0.2718
18	5	140595009	151986804	-0.004
18	5	152022470	152029980	-0.4187
18	5	152069274	167718496	-0.0102
18	5	167718524	167718536	-0.4438
18	5	167718982	176130382	0.0034
18	5	176131019	176131052	-0.3527
18	5	176131088	180375511	0.008
18	5	180396687	180408809	0.4574
18	5	180428536	180876320	0.007
18	6	148112	293331	-0.0166
18	6	296538	379514	-0.3205
18	6	379581	29648381	-0.0074
18	6	29648400	29648901	-0.2772
18	6	29649024	30038975	0.0167
18	6	30038998	30039476	0.1695
18	6	30039524	31146942	0.0063
18	6	31148332	31148552	-0.2335
18	6	31148606	31148612	-1.1319
18	6	31148657	31275881	-0.0712
18	6	31276664	31276669	-1.8771
18	6	31321433	32548402	0.0063
18	6	32548589	32555411	-0.2639
18	6	32556093	32633015	0.0169
18	6	32633102	32633163	-0.5089
18	6	32634009	33290780	-0.0003
18	6	33290840	33290857	0.2953
18	6	33290888	171036378	-0.0054
18	7	31006	159127977	-0.0031
18	8	29111	11973495	-0.0099
18	8	11977206	12051240	-0.2408
18	8	12052102	82754387	-0.0042
18	8	82754475	82754900	0.6726
18	8	82755304	146280537	-0.0027
18	9	11410	115833890	0.0011
18	9	115835613	115841081	0.7467
18	9	115841105	115851947	0.2049
18	9	115852992	141111396	0.0083
18	10	91802	135524081	-0.0009
18	11	123899	34492984	0.0027
18	11	34517541	34523679	-0.3484
18	11	34533294	58810187	-0.0039
18	11	58825714	58833356	0.2297
18	11	58866721	134945848	0.0026
18	12	148077	19282261	-0.0013
18	12	19282349	19282374	0.4479
18	12	19282718	31270326	-0.0135
18	12	31271429	31272119	-0.4621
18	12	31274424	54402443	0.004
18	12	54402697	54402717	0.299
18	12	54402888	113229392	-0.0041
18	12	113229465	113229584	0.3953
18	12	113229617	133779169	0.0007
18	13	19060404	115092495	-0.0065
18	14	19109438	20403845	-0.134
18	14	20404281	107284280	-0.0008
18	15	20101612	74023790	-0.0002
18	15	74023856	74024097	0.5112
18	15	74025634	102520452	0.0013
18	16	60438	15951195	0.0055
18	16	15951224	15951230	0.5661
18	16	15951809	88263144	0.001
18	16	88263261	88263263	0.5669
[truncated: 8,255 more rows]

## Sheet: sorted0.33
sample name	chromosome nr	loc.start	loc.end	segment mean
9	6	31276664	31276669	-2.3631
35	10	135122230	135122237	-2.2251
45	6	31276664	31276669	-2.0096
49	10	135122230	135122232	-1.9241
17	6	32489991	32490444	-1.8816
18	6	31276664	31276669	-1.8771
86	17	79905255	79905263	-1.8692
75	22	24284359	24300612	-1.8648
1	22	24284359	24300612	-1.8633
43	10	135122230	135122232	-1.8031
51	6	30039376	30039380	-1.7903
81	6	30039376	30039380	-1.7807
30	6	31276664	31276669	-1.7726
37	6	32489991	32490444	-1.7438
29	5	1003099	1003134	-1.7424
56	6	30039376	30039380	-1.7346
29	6	31276664	31276669	-1.7304
31	6	32489991	32490444	-1.7243
48	17	79905255	79905263	-1.715
20	22	39377790	39378283	-1.662
49	22	39377790	39378283	-1.6509
29	6	32489991	32490444	-1.6506
91	6	31276667	31276669	-1.6503
64	6	32632639	32632643	-1.6438
20	17	79905255	79905263	-1.6331
86	22	39377790	39378283	-1.6255
24	6	31148606	31148612	-1.6211
6	19	53290079	53290102	-1.5978
90	1	228756711	228756714	-1.5884
17	22	24373054	24373618	-1.5677
33	14	41623577	41623629	-1.5369
9	19	53290079	53290102	-1.5347
65	11	70257035	70257059	-1.5212
73	4	7750480	7750489	-1.5166
59	17	79905255	79905263	-1.5143
83	3	44803084	44803129	-1.4971
7	19	53290079	53290102	-1.482
22	1	228756711	228756714	-1.4777
19	6	32489991	32490444	-1.4744
13	1	228756711	228756714	-1.4662
28	6	32489991	32490444	-1.461
64	2	114260766	114261270	-1.4563
76	1	228756711	228756714	-1.4466
5	9	115835613	115841081	-1.4431
46	17	79905255	79905263	-1.4361
69	14	41623577	41623629	-1.4335
1	6	31148606	31148612	-1.4197
71	11	70257035	70257059	-1.4145
83	17	79905255	79905263	-1.406
80	17	79905255	79905263	-1.4054
42	6	171033352	171036378	-1.4051
32	17	79905255	79905263	-1.3965
43	16	83967545	83968316	-1.3942
84	1	171787181	171807195	-1.3926
58	1	152770502	152770520	-1.3812
33	1	21023073	21023132	-1.3793
32	1	21023073	21023132	-1.3765
74	19	53290079	53290102	-1.3654
31	17	79905255	79905263	-1.3546
54	6	32489991	32490444	-1.3527
73	6	31276667	31276669	-1.3522
10	6	31148606	31148612	-1.3445
74	14	41623577	41623629	-1.3423
42	6	30039376	30039380	-1.3415
72	16	83967545	83968316	-1.3308
24	1	228756711	228756714	-1.3297
37	17	79905255	79905263	-1.3285
54	2	114260766	114261270	-1.3273
54	6	30039376	30039380	-1.3251
72	5	180670992	180670995	-1.3221
34	17	79905255	79905263	-1.3211
20	1	12908861	12919079	-1.3205
58	17	79905255	79905263	-1.3152
9	3	44803084	44803129	-1.3134
79	11	70257035	70257059	-1.313
78	11	70257035	70257059	-1.3109
59	6	31148606	31148612	-1.3035
87	6	30039376	30039380	-1.2928
8	19	46389504	46389521	-1.2923
38	17	78809403	78809873	-1.2853
10	5	180396687	180408785	-1.2798
9	14	41623577	41623629	-1.2786
44	6	171033352	171036378	-1.268
84	1	228756711	228756714	-1.2597
69	19	33667906	33667908	-1.259
68	11	70257035	70257059	-1.2583
32	6	32489991	32490444	-1.2544
90	19	53290079	53290102	-1.2521
23	16	83967545	83968316	-1.2517
77	5	180396687	180408785	-1.2363
91	5	180396687	180408785	-1.2363
75	2	114260766	114261270	-1.2322
33	11	70257035	70257059	-1.2212
75	6	30039376	30039380	-1.2171
60	11	70257035	70257059	-1.2153
59	5	180396687	180408785	-1.2152
37	6	31148606	31148612	-1.2114
41	19	53290079	53290102	-1.2109
46	22	24373054	24381773	-1.2095
49	6	30039376	30039380	-1.2087
71	10	135122230	135122752	-1.2047
59	1	13737234	13737267	-1.2029
39	6	171033352	171036378	-1.1988
68	17	79905255	79905263	-1.1879
57	19	53290079	53290102	-1.1837
75	14	41623577	41623629	-1.1793
4	5	180396687	180408785	-1.1787
73	8	6940591	6940624	-1.1708
88	5	180396687	180408785	-1.1694
90	10	135122230	135122752	-1.1641
22	6	30039376	30039380	-1.1629
49	9	115835613	115841081	-1.1621
66	16	88263261	88263263	-1.1612
86	1	12908861	12919079	-1.1594
35	14	41623577	41623629	-1.1554
61	2	114260766	114261270	-1.1549
18	1	13737234	13737267	-1.15
39	5	180396687	180408785	-1.1484
64	19	53290079	53290102	-1.148
17	19	53290079	53290102	-1.1477
1	2	114260766	114261270	-1.1467
61	1	152770502	152777382	-1.1464
37	9	115835613	115835616	-1.1423
60	14	41623577	41623629	-1.1396
12	10	135122230	135122752	-1.1391
47	10	135122230	135122752	-1.1348
18	6	31148606	31148612	-1.1319
32	9	115835613	115841081	-1.1289
70	5	180396687	180408785	-1.1282
16	6	5004368	5004418	-1.1279
79	6	5004368	5004418	-1.1274
26	1	21023073	21023132	-1.1256
92	11	70257035	70257059	-1.1241
72	16	88263261	88263263	-1.1227
18	19	53290079	53290102	-1.1168
37	17	79792929	79792936	-1.116
13	1	12908861	12919079	-1.1156
60	3	137893707	137893718	-1.1153
40	17	78809403	78809873	-1.1147
79	5	180396687	180408785	-1.1126
49	6	171033352	171036378	-1.1088
73	11	70257035	70257059	-1.108
76	1	13737234	13737267	-1.0982
66	5	180396687	180408785	-1.0976
17	1	13737234	13737267	-1.097
84	6	31148606	31148612	-1.094
68	17	79792929	79792936	-1.0931
47	1	152770502	152777382	-1.0925
92	22	24373054	24373484	-1.0924
7	1	228756711	228756714	-1.0856
45	16	83967545	83968316	-1.0811
18	19	2131293	2131296	-1.0794
21	12	102457300	102459329	-1.0774
37	2	114260766	114261270	-1.0734
92	5	180396687	180408785	-1.0733
17	16	83967545	83968316	-1.0705
7	1	21023073	21023132	-1.066
9	5	180396687	180408785	-1.0642
20	19	53290079	53290102	-1.064
89	6	171033352	171036378	-1.0568
9	16	1306340	1306346	-1.0514
49	5	462522	463534	-1.0441
86	19	53290079	53290102	-1.0436
48	22	29196489	29196494	-1.0433
17	5	180396687	180408785	-1.036
86	5	649884	650104	-1.0359
58	5	180396687	180408785	-1.0305
6	9	115835613	115835616	-1.0264
10	16	1306340	1306346	-1.0222
86	14	41623577	41623629	-1.021
24	1	182361507	182361509	-1.0133
72	6	74363879	74363888	-1.0084
64	7	152622445	152622455	-1.0075
51	6	29648901	29649084	-1.0028
76	1	21023073	21023132	-1.0026
32	17	79792929	79792936	-1.0006
53	18	56802613	56806343	-0.9995
8	16	214776	214970	-0.9984
9	1	152770502	152777382	-0.9923
15	17	78809852	78809873	-0.9915
4	21	42219202	42219221	-0.9894
40	12	12503455	12503457	-0.9863
86	16	83967545	83968316	-0.9856
10	7	25019893	25019943	-0.9844
29	6	29796086	29796124	-0.9835
86	22	29196489	29196494	-0.9818
58	2	114260766	114261270	-0.9813
90	7	152622445	152622455	-0.9748
71	1	13737234	13737267	-0.9693
87	7	62809321	62859557	-0.964
53	6	31148606	31148612	-0.9635
83	19	45874111	45874153	-0.9603
86	17	79791791	79792936	-0.9603
63	1	47799633	47799638	-0.9583
6	16	15951224	15951230	-0.9546
87	1	13737234	13737267	-0.9481
41	17	78809852	78809873	-0.9479
92	1	13737234	13737267	-0.9433
35	16	88263261	88263263	-0.9404
43	1	21023073	21023132	-0.9404
6	7	25019893	25019943	-0.9377
62	6	31148606	31148612	-0.937
14	7	62809373	62859493	-0.9367
92	6	32489991	32490444	-0.9363
11	1	13737234	13737267	-0.9341
28	5	649884	650104	-0.9297
55	7	62809321	62859557	-0.9289
21	7	158712251	158712271	-0.9275
58	6	5004368	5004418	-0.926
20	7	158712251	158712271	-0.9252
52	7	158046838	158047359	-0.9231
28	1	13737234	13737267	-0.9221
22	5	180396687	180408785	-0.9214
37	10	71389949	71389956	-0.9138
26	16	1306340	1306346	-0.9113
86	6	74363879	74363888	-0.9102
4	16	88263261	88263263	-0.91
76	6	171033352	171036378	-0.9049
59	2	114260766	114261270	-0.9034
47	16	15951224	15951230	-0.9024
79	1	152770502	152777382	-0.9013
81	9	115835613	115851947	-0.8987
31	5	90679528	90679543	-0.8964
54	22	24373054	24384525	-0.8926
92	8	6940591	6940624	-0.8923
50	6	31364902	31439497	-0.8885
82	6	31148606	31148612	-0.8884
14	8	6940591	6940624	-0.8879
9	17	55038508	55038524	-0.8878
9	2	108537568	108537774	-0.8863
53	6	169240458	169241214	-0.8816
91	10	1369114	1369823	-0.8806
17	21	42219202	42219221	-0.8803
49	12	54402697	54402717	-0.878
47	19	45874111	45874153	-0.8746
2	8	6940591	6940624	-0.8716
24	7	6865970	6867070	-0.8713
16	6	74363879	74363888	-0.8708
33	3	137893707	137893718	-0.8703
70	1	182361507	182361509	-0.8703
52	5	90679528	90679543	-0.8691
39	22	17652741	17653367	-0.8687
32	1	13737234	13737267	-0.867
55	1	182361507	182361509	-0.8626
61	21	42219202	42219221	-0.8612
7	8	6940591	6940624	-0.8588
60	22	24348715	24381773	-0.8557
77	8	6940591	6940624	-0.8547
23	1	246684113	246684329	-0.8514
4	7	62809321	62859557	-0.8499
92	7	63667330	63667446	-0.8496
63	10	71389949	71389956	-0.8493
12	16	83967545	83968316	-0.8476
5	1	13737234	13737267	-0.8465
28	7	158046838	158047359	-0.8437
8	10	69835215	69835323	-0.843
27	7	158046838	158047359	-0.8382
37	20	1206693	1206700	-0.8367
11	11	18955977	18956283	-0.8361
79	20	1206693	1206700	-0.8358
13	6	29894228	29894248	-0.834
87	16	88263261	88263263	-0.8334
47	1	16974255	16975005	-0.8298
51	8	6940591	6940624	-0.8291
13	17	78809403	78809873	-0.8289
27	6	31276667	31276669	-0.8288
15	9	115835613	115851947	-0.8277
59	6	171033352	171036378	-0.8277
79	12	130389010	130389013	-0.8258
69	1	182361507	182361509	-0.8251
91	17	78809403	78809873	-0.825
30	11	128105129	128107248	-0.8241
27	10	69835215	69835323	-0.8231
70	1	1161866	1162280	-0.8221
50	1	13737234	13737267	-0.8213
3	8	6940591	6940624	-0.8209
26	3	44803084	44803129	-0.8194
53	19	45874111	45874153	-0.8145
60	1	110230252	110230401	-0.8141
18	17	78809403	78809873	-0.8134
21	6	74363879	74363888	-0.8083
88	17	55038508	55038524	-0.8071
65	7	73257045	73257083	-0.807
16	4	4147958	4149928	-0.8066
78	17	78809403	78809873	-0.8065
52	12	54402697	54402717	-0.8051
10	1	13737234	13737267	-0.8049
32	5	1663755	1663986	-0.8043
49	7	25019893	25019943	-0.8036
15	12	54402697	54402717	-0.803
46	5	90679528	90679543	-0.8023
70	11	61007964	61008041	-0.8021
8	5	649884	650104	-0.8004
64	19	53836837	53836866	-0.7985
73	1	31192151	31192165	-0.7982
31	1	149069731	149212246	-0.798
52	22	24348715	24384525	-0.7971
12	1	148000763	148025634	-0.797
76	20	1206693	1206700	-0.796
24	1	31192151	31192165	-0.7958
83	14	103389017	103389022	-0.7954
45	17	78809403	78809873	-0.7947
68	12	12503455	12503457	-0.7932
70	1	85462885	85462892	-0.7922
10	10	1369114	1369823	-0.7914
55	7	158046838	158047359	-0.7901
1	1	228756711	228756714	-0.7899
44	6	32632331	32632338	-0.7887
88	22	24348715	24384525	-0.7863
67	7	25019893	25019943	-0.785
24	1	1916894	1917911	-0.7816
28	1	182361507	182361509	-0.7814
53	6	29894228	29894248	-0.7807
22	6	74363884	74363888	-0.78
53	10	69835215	69835323	-0.7794
20	7	158046838	158047359	-0.7786
26	12	132286017	132286231	-0.7782
32	6	5004368	5004418	-0.7779
23	6	32121830	32121843	-0.7764
78	1	200707086	200708027	-0.7761
25	6	32489750	32490444	-0.7749
57	1	228756711	228756714	-0.7705
15	6	32489555	32489750	-0.7698
12	22	24348715	24384525	-0.7687
7	10	69835215	69835323	-0.7686
16	6	33084554	33084608	-0.7681
44	12	54402697	54402717	-0.768
60	5	649884	650104	-0.767
77	16	15951224	15951230	-0.7665
2	1	12908455	12940599	-0.7659
11	7	25019893	25019943	-0.7649
51	21	42219202	42219221	-0.7637
56	17	78809403	78809873	-0.763
70	7	134855689	134855695	-0.7613
53	1	21023073	21023132	-0.7594
83	19	33667906	33667908	-0.7587
5	22	24348715	24384525	-0.7583
64	12	133009863	133009956	-0.7535
26	16	15951224	15951230	-0.7529
48	12	133335658	133335817	-0.752
61	17	78809403	78809873	-0.7508
42	21	42219202	42219221	-0.7503
21	3	44803084	44803129	-0.7488
41	1	180992098	180992117	-0.7486
88	2	111877177	111877753	-0.7476
26	10	69835215	69835323	-0.7454
63	22	24348715	24384525	-0.7444
86	17	78809403	78809873	-0.7439
77	12	12503455	12503457	-0.743
45	22	24348715	24384525	-0.7403
17	16	89883212	89883240	-0.7396
57	7	158046838	158047359	-0.7389
74	6	33032830	33036958	-0.7386
59	22	24348715	24384525	-0.7372
30	17	79791791	79792936	-0.7343
44	4	132677675	132683397	-0.7322
3	22	24348715	24384525	-0.7304
49	19	6737490	6737494	-0.7298
38	4	42400885	42401056	-0.7295
70	7	158046838	158047359	-0.7295
58	22	30233609	30234213	-0.7281
47	6	32633102	32633163	-0.7276
42	6	29796086	29796124	-0.7275
2	7	73257045	73257083	-0.7273
73	12	12503455	12503457	-0.7269
87	17	78809403	78809873	-0.7267
2	10	69835215	69835323	-0.7266
37	22	24348715	24384525	-0.7262
73	4	42400885	42401056	-0.7257
83	10	70091615	70091617	-0.7251
4	10	30638342	30638372	-0.7241
79	17	19030144	19030146	-0.7241
64	12	12503455	12503457	-0.723
12	5	649884	650104	-0.7225
60	9	115835613	115835616	-0.7225
54	7	152622445	152622455	-0.7212
3	17	78809403	78809873	-0.7202
62	10	71389949	71389956	-0.7201
26	10	71389949	71389956	-0.7198
26	8	8086144	8086146	-0.7178
61	7	63222556	63225198	-0.717
57	17	79791791	79792936	-0.7167
67	1	47799633	47799638	-0.7167
39	6	169641232	169641288	-0.7166
80	17	79791791	79792936	-0.7166
5	1	16975005	16975443	-0.7157
77	22	24348715	24384525	-0.7157
77	11	1086733	1086863	-0.7142
76	17	45177429	45177431	-0.7136
20	7	73257045	73257083	-0.7135
67	6	32489555	32489991	-0.7135
58	6	29894197	29894248	-0.712
63	5	649884	650104	-0.7112
6	7	32535165	32535189	-0.7105
60	6	31239243	31239247	-0.7105
53	1	155202674	155202685	-0.71
12	16	88263261	88263263	-0.7099
72	5	140097950	140098496	-0.7086
91	10	71389949	71389956	-0.7083
48	17	79791791	79792936	-0.7068
2	13	114964101	114964125	-0.7058
23	1	180992098	180992117	-0.7055
32	1	152770502	152777382	-0.7054
49	22	24348715	24384525	-0.7054
31	6	169240458	169241214	-0.7046
10	1	155202674	155202685	-0.7032
33	10	71389949	71389956	-0.7025
78	8	1797886	1797917	-0.702
12	9	115835613	115841081	-0.7013
84	6	74363879	74363888	-0.7007
10	16	15951224	15951230	-0.7006
80	14	73360841	73360857	-0.7006
49	10	71389949	71389956	-0.6994
91	17	19030144	19030146	-0.6963
25	8	7571231	7571936	-0.6961
37	16	15951224	15951230	-0.6957
37	1	47799633	47799638	-0.6937
53	19	49527060	49527339	-0.6935
21	6	29894228	29894248	-0.6934
71	2	130956098	130956119	-0.6932
68	4	7750480	7750489	-0.6917
77	1	182361507	182361509	-0.6889
47	6	74363879	74363888	-0.6887
74	19	46389504	46389676	-0.6874
83	6	32633102	32633163	-0.6873
57	7	75957061	75957202	-0.6868
3	4	4147958	4149928	-0.6859
83	5	649884	650104	-0.6854
33	1	228756711	228756714	-0.6847
59	11	18956196	18957755	-0.684
28	1	1916894	1917911	-0.6837
33	8	1299636	1300388	-0.6832
11	1	180992098	180992117	-0.6821
57	18	54813330	54814189	-0.6816
3	5	2739652	2739892	-0.6805
73	16	15951224	15951230	-0.6798
53	11	128105129	128107248	-0.6795
33	22	24348715	24381773	-0.6783
5	10	71389949	71389956	-0.677
1	1	180992098	180992117	-0.6758
3	9	115835613	115835616	-0.6746
58	1	148000763	148025634	-0.6746
32	6	29796086	29796124	-0.6743
6	19	58951672	58951684	-0.6728
17	17	78809403	78809873	-0.672
61	6	29894228	29894248	-0.672
67	12	54402697	54402717	-0.6715
53	3	38496311	38496316	-0.6712
54	12	133009863	133009956	-0.6708
86	4	7750480	7750489	-0.6686
30	4	132677675	132683397	-0.6685
45	7	73257045	73257083	-0.6672
73	5	180396687	180408785	-0.6666
10	3	38496311	38496316	-0.6661
10	11	128105129	128107248	-0.6659
5	1	228756711	228756714	-0.6658
42	7	73257045	73257083	-0.6654
80	19	55549722	55549746	-0.6648
5	1	65613383	65613392	-0.664
66	12	133009863	133009956	-0.6636
19	5	55412925	55418205	-0.6619
33	1	47799633	47799638	-0.6619
8	7	75957061	75957202	-0.6611
31	7	134855689	134855695	-0.6592
56	10	104263680	104263688	-0.659
21	3	53926056	53926101	-0.6586
71	6	41123086	41123110	-0.6584
38	9	115835613	115835616	-0.6579
31	1	121467175	121472061	-0.6558
21	19	4607318	4607324	-0.6556
19	8	11986933	11997496	-0.6555
9	3	197517984	197518007	-0.6553
67	10	70091615	70091617	-0.6553
8	10	71389949	71389956	-0.6552
87	16	15951224	15951230	-0.654
89	8	7571231	7571936	-0.6538
40	1	180992098	180992117	-0.6534
32	3	44803084	44803129	-0.6533
82	1	180992098	180992117	-0.6526
70	1	121467175	121472061	-0.6525
17	10	50887472	50887488	-0.6524
5	17	78809403	78809873	-0.6521
1	5	167718524	167718536	-0.6515
38	1	200707086	200708027	-0.6487
86	5	180396687	180408785	-0.6487
17	1	1916894	1917911	-0.6483
77	10	71389949	71389956	-0.6478
31	3	182509366	182510892	-0.6476
46	21	42219202	42219221	-0.6475
78	6	32632106	32632338	-0.6475
36	6	32489553	32489991	-0.6469
70	17	45177429	45177431	-0.6469
52	5	1003099	1003134	-0.6462
55	12	50794550	50794574	-0.6456
49	6	32633015	32633163	-0.6453
75	7	32535165	32535168	-0.645
51	12	12503455	12503457	-0.6443
12	12	54355460	54355476	-0.6442
43	1	182361507	182361509	-0.6437
9	6	74363879	74363888	-0.6435
34	17	79791791	79792936	-0.6435
47	2	241629829	241638367	-0.6435
7	10	71389949	71389956	-0.643
32	19	45874111	45874153	-0.643
88	14	103389017	103389022	-0.642
24	19	4607318	4607324	-0.6413
37	13	107220655	107220663	-0.6413
86	19	4607318	4607324	-0.6408
3	3	194785978	194790434	-0.6406
12	18	74960996	74961002	-0.6404
72	17	79791791	79792936	-0.6401
27	2	108443511	108446590	-0.6393
13	17	34599556	34626096	-0.6378
19	7	73257045	73257083	-0.6376
51	16	1006052	1006166	-0.6376
51	17	78809403	78809873	-0.6368
78	10	69835215	69835323	-0.6361
8	12	50794550	50794574	-0.6359
72	13	34117139	34118017	-0.6356
68	4	132677675	132677681	-0.6353
6	1	65613383	65613392	-0.6348
80	7	73257045	73257083	-0.6339
88	5	90679528	90679543	-0.6334
36	3	38496311	38496316	-0.6322
81	10	71389949	71389956	-0.6321
69	15	69744829	69744850	-0.6312
65	20	1206693	1206700	-0.6304
22	7	73257045	73257083	-0.6302
75	1	16974255	16975005	-0.6288
19	17	78809403	78809873	-0.6276
37	11	128105129	128107248	-0.6275
51	5	34044504	34044727	-0.6273
88	15	75287824	75287851	-0.6271
69	6	32633102	32633163	-0.6266
55	19	57831544	57831549	-0.6265
47	17	78809403	78809873	-0.6263
70	12	9436616	9436621	-0.626
24	8	42195861	42195863	-0.6249
36	7	158649319	158649327	-0.6249
42	17	55038508	55038524	-0.6241
47	7	101007190	101007442	-0.6238
6	1	12908455	12946833	-0.623
68	6	30039432	30039442	-0.6229
4	19	4607318	4607324	-0.6226
1	5	2739652	2739892	-0.6225
31	19	4607318	4607324	-0.6225
51	16	15951224	15951230	-0.6218
83	7	73257045	73257083	-0.6217
91	7	1198841	1198926	-0.6217
5	6	29894228	29894248	-0.6202
37	11	1086733	1086863	-0.6202
76	1	155202674	155202685	-0.6193
56	12	133009863	133009956	-0.6183
82	4	16258163	16258226	-0.6181
88	7	73257045	73257083	-0.6176
44	10	69835215	69835323	-0.617
63	7	128691977	128692716	-0.6166
46	14	103389017	103389022	-0.6163
72	1	152770502	152777382	-0.6157
10	1	1916894	1917911	-0.6149
37	7	75957061	75957202	-0.6143
72	17	55038508	55038524	-0.6136
92	19	4607318	4607324	-0.6136
29	19	49527060	49527339	-0.6135
78	6	32632848	32632992	-0.6135
55	7	152622445	152622455	-0.6134
70	12	113229582	113229584	-0.6134
83	6	31963912	31980043	-0.6115
1	19	33667906	33667908	-0.6113
56	12	31272112	31272119	-0.6108
3	11	113846918	113846937	-0.6105
2	12	8541476	8543302	-0.6104
12	6	74363879	74363888	-0.61
16	9	115835613	115835616	-0.6078
44	4	7750480	7750489	-0.6076
72	12	50794550	50794574	-0.607
5	16	15951224	15951230	-0.6069
52	5	152022470	152029980	-0.6067
60	18	77568900	77568902	-0.6067
3	17	45177429	45177431	-0.6063
49	5	177298965	177302752	-0.6061
88	6	33290840	33290857	-0.6058
50	12	12503455	12503457	-0.6056
23	6	74363879	74363888	-0.6047
25	12	133003394	133003928	-0.6047
27	22	24348715	24384525	-0.6047
58	6	32489553	32489991	-0.6047
52	17	45177429	45177431	-0.6044
54	4	4117213	4119945	-0.604
73	9	115835613	115841081	-0.6038
63	12	54402697	54402717	-0.6032
2	7	6865970	6867070	-0.6029
11	17	78809403	78809873	-0.6027
11	12	133009863	133009956	-0.6026
50	16	15951224	15951230	-0.6026
44	12	113229582	113229584	-0.602
50	1	85462885	85462892	-0.6019
74	5	175488849	175491744	-0.6018
81	5	152022470	152029980	-0.6011
21	16	15951224	15951230	-0.601
40	7	73257045	73257083	-0.601
81	8	3974030	3974225	-0.6005
54	7	73257045	73257083	-0.6003
67	10	125751386	125751413	-0.6003
91	16	2039391	2039411	-0.6002
7	5	167718524	167718536	-0.5996
86	4	6675660	6675680	-0.5993
40	6	32632331	32632338	-0.599
53	7	73257045	73257083	-0.5988
32	10	71389949	71389956	-0.5987
55	1	152770502	152777382	-0.5985
91	5	140554610	140557256	-0.5984
21	4	42400885	42401056	-0.598
36	5	1003099	1003134	-0.598
61	3	129799733	129804842	-0.5977
83	3	126373967	126373980	-0.5972
66	5	2739652	2739892	-0.5967
33	11	128105129	128107248	-0.5965
33	10	69835215	69835323	-0.5958
4	6	27648895	27648908	-0.5955
10	14	19613906	19614556	-0.5936
15	12	7053164	7053170	-0.5933
82	17	78809403	78809873	-0.5932
46	1	31192151	31192165	-0.5928
80	6	74363884	74363888	-0.5926
57	12	133335658	133335817	-0.5925
14	1	182361507	182361509	-0.5924
83	15	32607260	32607923	-0.5924
25	3	182509366	182510892	-0.5923
86	14	103389017	103389022	-0.5923
88	3	196325238	196325552	-0.5918
36	1	31192151	31192158	-0.5913
80	16	15951224	15951230	-0.5913
85	7	73257045	73257083	-0.5904
3	12	12503455	12503457	-0.5903
32	12	113229582	113229584	-0.5902
43	1	121467175	121472061	-0.5896
71	10	69835215	69835323	-0.5893
65	22	24348715	24384525	-0.5891
61	7	102161506	102212892	-0.5888
70	6	32938280	32938295	-0.5885
31	16	15951224	15951230	-0.5884
71	3	46718979	46718990	-0.5884
17	19	45874080	45874153	-0.587
16	12	113229465	113229584	-0.5867
21	1	1916894	1917911	-0.5866
39	8	6826392	6837932	-0.5861
70	17	78809403	78809873	-0.586
88	6	74363879	74363888	-0.586
36	1	200707086	200708027	-0.5859
81	1	47799633	47799638	-0.5857
39	15	78632859	78632861	-0.5852
48	17	45177429	45177431	-0.5851
3	2	239144301	239145904	-0.5849
83	22	18825219	18832673	-0.5848
28	6	29943455	29943480	-0.5844
10	1	121467175	121472061	-0.584
16	10	69835215	69835323	-0.5839
4	6	74363879	74363888	-0.5836
72	4	109541622	109541635	-0.5836
72	8	42195861	42195863	-0.5834
32	16	15951224	15951230	-0.5833
86	19	53836837	53836866	-0.5828
67	10	71389949	71389956	-0.5825
86	1	200707086	200708027	-0.5825
37	19	728040	728095	-0.5819
79	17	71189054	71189066	-0.5819
6	4	140222502	140222523	-0.5812
26	6	32632106	32632995	-0.5811
92	4	42400885	42401056	-0.5811
68	19	49140777	49140787	-0.5801
57	1	121467175	121472061	-0.5799
44	4	109541622	109541635	-0.5791
80	10	69835215	69835323	-0.5791
30	12	54355460	54355476	-0.5781
49	17	45177429	45177431	-0.5778
88	10	71389949	71389956	-0.5777
64	21	41554681	41554930	-0.5772
83	8	145497339	145501817	-0.577
33	20	1206682	1206700	-0.5761
29	4	42400885	42401056	-0.5759
28	6	30039432	30039442	-0.5755
45	7	23054001	23054024	-0.5747
84	3	194785978	194786218	-0.5747
82	4	42400885	42401056	-0.5734
50	7	128691977	128692716	-0.5733
26	15	75287824	75287854	-0.573
37	3	129799733	129800573	-0.5728
61	6	32489553	32489991	-0.5728
83	6	32032716	32032728	-0.5717
67	16	88263261	88263263	-0.5713
30	19	45874111	45874153	-0.5711
58	5	140554610	140557256	-0.5711
49	5	83429	84730	-0.5707
83	2	130955686	130956119	-0.5699
38	1	180992098	180992117	-0.5695
13	11	18955977	18956283	-0.569
87	12	114029248	114029577	-0.5688
34	11	487126	487213	-0.5684
77	6	31324916	31325000	-0.5674
20	10	50887472	50887488	-0.5664
32	20	1206693	1206700	-0.5662
55	6	32632331	32632338	-0.5652
63	6	32632331	32632338	-0.5652
84	12	113229582	113229584	-0.5643
28	17	78809403	78809873	-0.5637
37	6	30449064	30449068	-0.5633
12	11	18955977	18957755	-0.5631
43	11	18955977	18956283	-0.5627
57	12	6420034	6420041	-0.5625
30	7	25019893	25019943	-0.5623
86	16	15951224	15951230	-0.5621
9	17	78809403	78809873	-0.5616
5	12	50794550	50794574	-0.56
73	19	43691930	43710277	-0.5598
23	4	16258163	16258226	-0.5587
62	10	104263680	104263688	-0.5586
29	2	239144301	239145904	-0.558
21	12	54402697	54402717	-0.5579
54	5	140222253	140237879	-0.5574
55	11	113846918	113846937	-0.5571
55	11	118902213	118902351	-0.5569
40	7	32535165	32535189	-0.5563
7	16	15951224	15951230	-0.5559
15	5	1003099	1003134	-0.5559
80	11	131780278	131780334	-0.5542
37	20	32031702	32031707	-0.5539
39	12	133003394	133003928	-0.5531
29	1	155202674	155202685	-0.5529
12	1	85462885	85462892	-0.5526
12	12	12503455	12503457	-0.5524
86	5	152022470	152029980	-0.5522
26	16	57562740	57562841	-0.5517
20	7	134855689	134855695	-0.5513
19	10	50887472	50887488	-0.5512
29	15	78632859	78632861	-0.551
58	19	49527060	49527339	-0.5507
84	3	129799733	129800573	-0.5507
56	10	134647259	134647457	-0.5503
92	20	56964081	56964089	-0.5502
34	11	78512268	78521705	-0.5495
2	10	71389949	71389956	-0.5494
82	6	130543838	130544832	-0.5489
64	1	2415344	2415453	-0.5488
55	10	70091615	70091617	-0.5485
20	3	44803084	44803129	-0.548
3	19	43691930	43711064	-0.5471
47	8	6826392	6837932	-0.5469
58	6	32633015	32633163	-0.5467
50	5	69371421	69483768	-0.5465
84	5	140554610	140557256	-0.5463
79	11	118902213	118902351	-0.5458
86	15	38987310	38987640	-0.5455
64	8	15420520	15431358	-0.5454
49	20	32031702	32031707	-0.5449
41	6	32032716	32032728	-0.5447
65	11	18956196	18957755	-0.5447
1	19	49866923	49866942	-0.5432
32	4	132677675	132683397	-0.5425
16	11	118902213	118902351	-0.5418
81	6	74363879	74363888	-0.5416
54	19	54494652	54494658	-0.5414
69	20	23549522	23549525	-0.5413
39	10	71892768	71892787	-0.5406
33	2	130955686	130956255	-0.5404
13	3	196325238	196325552	-0.5402
40	3	53926056	53926101	-0.5401
82	1	2876546	2876723	-0.5401
5	17	55038508	55038524	-0.54
29	11	113846918	113846937	-0.5397
37	3	53926056	53926101	-0.5396
22	10	71389949	71389956	-0.5395
23	4	109541622	109541635	-0.5395
75	11	113846918	113846937	-0.5394
39	16	15951224	15951230	-0.5387
4	16	2039391	2039411	-0.5385
4	1	2415344	2415453	-0.5378
7	4	140222502	140222523	-0.537
7	19	387968	398562	-0.5365
80	4	7750480	7750489	-0.5358
16	5	83429	84730	-0.5345
33	12	50794550	50794574	-0.5345
42	1	85462885	85462892	-0.5345
82	5	135416381	135416412	-0.5345
86	2	8116953	8117019	-0.5345
17	8	11973495	11996937	-0.534
4	7	73257045	73257083	-0.5339
46	12	113229582	113229584	-0.5335
4	17	55038508	55038524	-0.5333
56	20	1206682	1206700	-0.5333
81	7	73257045	73257083	-0.533
81	17	19030144	19030146	-0.5315
58	16	224928	225666	-0.5314
59	15	69744829	69744850	-0.5313
83	20	60520624	60522664	-0.5308
79	10	71389949	71389956	-0.5303
24	12	26986520	26986763	-0.5298
83	3	137893699	137893718	-0.5298
72	12	113229582	113229584	-0.5289
13	7	32535165	32535189	-0.5288
80	17	55333919	55333926	-0.5287
24	19	54746613	54748112	-0.5284
10	16	85966435	85966545	-0.5275
29	6	33290840	33290857	-0.5275
44	6	32032716	32032728	-0.5268
76	19	45874080	45874153	-0.5252
23	10	70091615	70091617	-0.5248
51	12	113229582	113229584	-0.5246
77	18	77588682	77589649	-0.5243
67	15	69744829	69744850	-0.524
56	17	77454278	77454437	-0.5239
60	1	76251865	76251867	-0.5239
81	11	10209919	10229755	-0.5234
41	1	31192151	31192165	-0.5229
4	17	78809403	78809873	-0.5225
54	6	32032716	32032728	-0.5219
77	1	1916894	1920339	-0.5219
15	11	82782984	82783003	-0.5218
4	18	12254551	12254556	-0.5216
71	1	200707086	200708027	-0.5212
20	8	6826392	6837932	-0.5209
62	1	161410551	161427101	-0.5192
40	1	121467175	121472061	-0.5186
55	12	114029248	114029577	-0.5184
5	4	7750480	7750489	-0.5182
40	8	145499436	145501817	-0.5181
80	17	55038508	55038524	-0.5173
13	17	62340717	62340732	-0.5171
30	5	1003099	1003134	-0.5158
41	14	97431137	97431164	-0.5158
56	12	132970851	132971019	-0.5157
2	12	50794550	50794574	-0.5153
29	4	46391694	46391737	-0.5149
3	5	152022470	152029980	-0.5143
48	17	71189054	71189066	-0.5143
30	19	54134044	54134782	-0.5142
31	16	2955283	2955295	-0.514
43	12	31271783	31272119	-0.5131
87	2	241629829	241638367	-0.5126
92	6	74363879	74363888	-0.5126
1	8	6826392	6837932	-0.5125
23	14	97431137	97431164	-0.5121
55	15	75287824	75287851	-0.5116
81	10	69835215	69835323	-0.5114
54	5	167718496	167718536	-0.511
83	12	69753446	69753606	-0.511
52	18	56802613	56806343	-0.5109
59	1	155202674	155202685	-0.5102
65	10	71389949	71389956	-0.5102
2	5	135416381	135416412	-0.5099
45	7	32535165	32535189	-0.5096
70	1	31192151	31192165	-0.5094
15	18	10589357	10589360	-0.5093
73	2	242710250	242710939	-0.5093
18	6	32633102	32633163	-0.5089
89	17	71189054	71189066	-0.5089
76	1	54355906	54358446	-0.5085
75	19	55309528	55315034	-0.5082
37	6	32032716	32032728	-0.5073
43	21	34144118	34144284	-0.507
69	11	18955977	18957755	-0.5063
49	11	61007964	61008041	-0.506
65	1	85462885	85462892	-0.506
77	10	2563965	2564866	-0.5054
9	5	78202845	78224071	-0.5051
43	7	73257045	73257083	-0.5049
72	1	121467175	121472061	-0.5048
16	17	45177429	45177431	-0.5047
80	19	55309528	55327234	-0.5047
78	5	152022470	152029980	-0.5046
1	6	31083322	31084107	-0.504
26	17	933047	933179	-0.5037
47	1	91870382	91870389	-0.5036
50	2	241629829	241638367	-0.5035
6	10	71389949	71389956	-0.5033
71	5	140554610	140557256	-0.503
44	20	708659	709016	-0.5023
25	17	78809403	78809873	-0.5016
25	17	62340717	62340732	-0.5015
89	16	15951224	15951230	-0.5015
11	17	10102232	10102237	-0.5014
2	7	75957061	75957202	-0.5013
24	12	54402697	54402717	-0.5009
41	1	47799633	47799638	-0.5005
7	16	2039391	2039411	-0.4987
36	6	32032716	32032728	-0.4984
49	11	113846918	113846937	-0.4983
17	4	7750448	7750489	-0.4981
8	6	32032716	32032728	-0.4973
50	6	31275664	31276669	-0.497
15	4	46391694	46391737	-0.4967
8	6	32489750	32489991	-0.4965
9	1	200707086	200708027	-0.4965
29	19	55309528	55327234	-0.4961
63	6	74363879	74363888	-0.4957
28	11	18956196	18957755	-0.4956
20	10	104263680	104263688	-0.4953
29	8	92129661	92177481	-0.4953
91	7	56434951	56437009	-0.495
8	12	7781093	7781431	-0.4944
65	12	7781093	7781431	-0.4942
74	5	140554610	140557256	-0.4939
53	6	130543838	130544832	-0.4936
67	6	31126267	31126273	-0.493
36	3	17666379	17686199	-0.4928
75	11	18956196	18957755	-0.4926
49	17	66194695	66194706	-0.4923
84	10	71389949	71389956	-0.4921
41	12	54355460	54355476	-0.4917
21	16	88263261	88263263	-0.4913
81	5	140554610	140557583	-0.4912
36	10	71389949	71389959	-0.4909
64	17	19015961	19030146	-0.4909
12	1	47799633	47799638	-0.4902
55	8	92129661	92177481	-0.4899
4	6	32032716	32032728	-0.4898
48	6	31782918	31782929	-0.4897
29	5	83429	84730	-0.4896
32	5	140554610	140557583	-0.4896
41	17	55038508	55038524	-0.4895
54	1	65613383	65613392	-0.4891
81	6	32032716	32032728	-0.4891
69	7	143895753	144054288	-0.489
81	1	31192151	31192165	-0.489
34	22	20710577	20714779	-0.4889
77	7	25019893	25019943	-0.4889
78	4	16258163	16258684	-0.4885
71	6	32032716	32032728	-0.4881
48	1	41350183	41350292	-0.488
14	12	110012484	110012500	-0.4873
27	4	68265207	68265802	-0.4873
38	8	1299636	1300388	-0.4873
57	8	28479636	28479639	-0.4873
25	17	34597546	34641309	-0.4868
10	22	39378224	39378283	-0.4863
42	11	131780278	131780353	-0.4863
12	14	107095027	107186057	-0.4856
17	4	1366463	1366662	-0.4856
12	7	53879422	53879728	-0.4851
64	1	31192151	31192165	-0.4847
60	12	69753446	69753606	-0.4846
20	6	32632937	32633015	-0.4844
24	11	66035629	66035641	-0.484
12	7	128691977	128692716	-0.4839
81	12	69753446	69753606	-0.4835
72	9	115835613	115841081	-0.4834
11	17	61851458	61851465	-0.4822
66	1	41350183	41350292	-0.482
50	3	64670013	64670017	-0.4816
27	12	7781093	7781431	-0.4809
89	8	6826392	6837932	-0.4808
22	5	167718524	167718536	-0.4805
71	11	132864104	132864113	-0.4799
7	12	50297936	50297945	-0.4796
50	1	152506922	152553244	-0.4782
67	5	140554610	140557256	-0.4781
6	20	60520624	60522664	-0.478
89	3	129799733	129800573	-0.4778
47	22	45148218	45148229	-0.4777
50	1	121467175	121472061	-0.4771
55	1	65613383	65613392	-0.477
11	8	11986501	11997496	-0.4765
42	8	42195861	42195863	-0.476
28	6	29911087	29911265	-0.4759
26	11	113659927	113659952	-0.4756
64	4	7184654	7187328	-0.4755
43	16	15951224	15951230	-0.4752
65	17	55038508	55038524	-0.475
68	12	69753446	69753606	-0.4742
58	6	33244715	33244755	-0.4738
42	1	121467175	121472061	-0.4734
5	8	82754387	82754497	-0.4729
63	6	33290840	33290857	-0.4726
74	15	69744829	69744850	-0.4716
66	1	12908455	13111908	-0.4715
79	1	31192151	31192165	-0.471
63	7	152622445	152622787	-0.4698
11	1	31192151	31192165	-0.4696
50	12	50794550	50794574	-0.4694
25	11	113659927	113659952	-0.4677
51	13	27998603	27998621	-0.4676
22	12	32112286	32112291	-0.4671
35	5	140556503	140557227	-0.4664
75	6	32528968	32548402	-0.4664
4	6	32121830	32121841	-0.4661
6	15	75287824	75287854	-0.4661
28	1	2415344	2415453	-0.4656
56	18	77588682	77589649	-0.4656
10	1	180992098	180992117	-0.4653
9	7	75957061	75957202	-0.4649
18	12	31271429	31272119	-0.4621
40	12	26986520	26986763	-0.4617
53	7	8302251	8302271	-0.4617
3	1	31192151	31192165	-0.4614
29	12	54355460	54355476	-0.4613
68	20	32031702	32031707	-0.4603
26	11	18956196	18957755	-0.4599
20	8	1299636	1300388	-0.4591
11	5	140554610	140557256	-0.4589
54	1	101360652	101360669	-0.4587
77	1	47799633	47799638	-0.4584
34	20	56964081	56964089	-0.4578
17	1	143663862	143664131	-0.4577
61	10	134925902	134926810	-0.4577
31	22	45148218	45148229	-0.4576
17	8	92129661	92177481	-0.4571
27	6	32546665	32548402	-0.457
29	10	71389949	71389956	-0.4565
73	10	69835215	69835323	-0.4565
47	3	182509366	182510892	-0.4564
7	12	54402697	54402717	-0.456
68	19	54134044	54134782	-0.4556
71	19	46623200	46628137	-0.4546
29	1	31192151	31192165	-0.4545
92	11	131780278	131780353	-0.4545
13	6	31237199	31237664	-0.4541
1	5	79950501	79950508	-0.4535
20	3	195423806	195447691	-0.4533
76	1	200707086	200708096	-0.4533
54	5	140554610	140557256	-0.4531
88	6	32032716	32032728	-0.453
40	5	140554610	140557627	-0.4522
91	6	33049983	33052797	-0.4522
9	10	71389949	71389959	-0.452
91	1	101360652	101360669	-0.4519
38	8	124780837	124780849	-0.4506
65	7	158046838	158047359	-0.4503
72	5	78202845	78224071	-0.45
87	19	38343327	38344455	-0.45
80	8	6826392	6837932	-0.4499
36	18	56802613	56806343	-0.4498
10	6	32633015	32633163	-0.4497
25	19	45874080	45874153	-0.4497
68	20	56964081	56964089	-0.4494
51	21	41554681	41554930	-0.4489
38	12	54402697	54402717	-0.4487
33	6	31148370	31148612	-0.4485
56	4	68265207	68265802	-0.4485
58	1	2415344	2415453	-0.4484
31	12	129572610	129573603	-0.4483
45	19	38343327	38344455	-0.4483
50	22	47558273	47559425	-0.4483
86	11	64546351	64546370	-0.4479
70	20	60521757	60522664	-0.4474
38	1	165738514	165738563	-0.4472
80	10	135387962	135394507	-0.4468
38	9	211689	215561	-0.4465
88	12	69753446	69753606	-0.4465
57	11	118902213	118902351	-0.4463
66	12	31271429	31272119	-0.4463
41	11	20690930	20690934	-0.4462
43	8	82754475	82754497	-0.4459
38	4	46391694	46391737	-0.4458
65	1	54355906	54358446	-0.4458
28	8	145497339	145501817	-0.4455
9	3	100428145	100428147	-0.4451
62	11	118902213	118902351	-0.4449
63	17	34597546	34639626	-0.4449
71	3	197385002	197388269	-0.4444
18	5	167718524	167718536	-0.4438
72	8	145497339	145501817	-0.4434
10	1	101360652	101360669	-0.4432
19	19	54134044	54134782	-0.4429
47	14	19600442	19614556	-0.4424
80	5	110189233	110252994	-0.4424
12	5	140554610	140557627	-0.4422
79	1	47799633	47799638	-0.4419
12	1	54355906	54358446	-0.4418
16	22	45148218	45148229	-0.4417
15	4	68265207	68265891	-0.4416
58	1	149514272	149576021	-0.4413
73	7	73257045	73257083	-0.4404
26	12	3782889	3783166	-0.4399
86	3	129799733	129804842	-0.4399
12	11	131780276	131780334	-0.4396
3	8	19674705	19674713	-0.4392
79	17	61851458	61851465	-0.4388
11	1	152506922	152553244	-0.4385
56	20	17673325	17674250	-0.4384
7	4	22148230	22148354	-0.4382
59	1	31192151	31192165	-0.4376
22	8	82754475	82754900	-0.4365
32	9	115841105	115851947	-0.4362
12	7	73257045	73257083	-0.4361
19	15	21146458	21147039	-0.4359
30	7	23053981	23054024	-0.4359
80	16	214776	215002	-0.4359
5	8	74006994	74009438	-0.4353
25	1	12891355	13036637	-0.4352
49	12	69753446	69753606	-0.4351
50	6	31782918	31782929	-0.4346
25	20	60520624	60522664	-0.4341
80	6	133119734	133119739	-0.4334
17	4	7184654	7187328	-0.4328
40	7	143895753	144049427	-0.4327
83	7	56434951	56437746	-0.4327
83	5	140554610	140557256	-0.4324
26	17	85360	85492	-0.4321
83	22	45148218	45148229	-0.4321
55	15	38987310	38987640	-0.4318
20	4	109541622	109541635	-0.4316
5	3	113465772	113465925	-0.4313
17	1	248753499	248791716	-0.431
34	1	152538380	152553244	-0.4304
6	4	4139646	4149928	-0.4297
41	16	21513691	21514953	-0.4294
83	3	53912235	53914075	-0.4286
39	9	115833890	115851947	-0.4285
5	13	107220655	107220663	-0.4282
19	20	32031702	32031707	-0.4279
5	5	135416331	135416412	-0.4275
2	17	18379129	18432149	-0.427
21	1	12891355	12946833	-0.4269
76	13	47035271	47036612	-0.4269
36	5	140554610	140557256	-0.4266
74	12	9757161	9760326	-0.4265
54	3	195423806	195447691	-0.4262
29	3	183993721	183993726	-0.4259
26	4	46391694	46391737	-0.4257
45	22	45148218	45148229	-0.4257
22	20	17673325	17674250	-0.4253
79	1	41350183	41350292	-0.4251
27	10	104263680	104263688	-0.4243
58	1	101360652	101360669	-0.4242
35	3	48754871	48754875	-0.4238
8	19	40372977	40375973	-0.4237
65	9	45726961	45733081	-0.4236
32	16	2955283	2955295	-0.4231
8	10	109849668	109857081	-0.423
86	21	47581042	47582049	-0.423
5	17	34597546	34639626	-0.4224
78	5	140214372	140221364	-0.4224
46	16	2955283	2955295	-0.4223
88	5	135416331	135416594	-0.4222
46	12	19282349	19282374	-0.4216
62	12	7781093	7781431	-0.4212
1	5	135416331	135416412	-0.4211
38	18	10589357	10589360	-0.4211
10	8	8085844	8086607	-0.4206
68	13	27998603	27998609	-0.4205
26	22	20710577	20715555	-0.4202
25	15	40228656	40233976	-0.4201
32	6	32632106	32633015	-0.4199
13	7	102212892	102259241	-0.4192
85	5	140554610	140557256	-0.419
31	11	11643754	11643760	-0.4189
18	5	152022470	152029980	-0.4187
71	3	195423806	195447691	-0.418
13	10	368911	369137	-0.4179
37	10	69835215	69835323	-0.4176
27	3	75705108	75705922	-0.4169
76	6	73973719	74007703	-0.4167
72	19	35068710	35069691	-0.416
38	6	32032716	32032728	-0.4159
8	4	7750448	7750489	-0.4156
59	5	135416331	135416613	-0.4155
19	8	7213522	7396283	-0.415
6	4	46391694	46391737	-0.4143
13	13	98885809	98892233	-0.4143
48	12	57984920	57984923	-0.4142
50	2	130955686	130956271	-0.4141
71	11	22851383	22851422	-0.4135
28	2	73867196	73907327	-0.4131
61	6	6605918	6606132	-0.4131
83	4	9475346	9479622	-0.4131
3	17	18379129	18432149	-0.4128
11	1	248753499	248791716	-0.4128
34	11	118902213	118902351	-0.4128
87	12	113229582	113229584	-0.4127
9	8	19674705	19674713	-0.4123
60	15	69744829	69744850	-0.4123
13	5	140554610	140557627	-0.412
72	5	167718496	167718536	-0.4118
58	19	53496835	53496893	-0.4101
8	7	32535165	32535189	-0.41
9	5	140554610	140557256	-0.4089
77	10	86001241	86001246	-0.4089
81	17	71189054	71189066	-0.4087
7	3	194785978	194790434	-0.4084
57	16	1383574	1383595	-0.4073
1	1	161563355	161591659	-0.4071
69	5	140554610	140557256	-0.4062
71	10	71892694	71892787	-0.4053
69	8	144810034	144810657	-0.4052
28	6	100914639	100914733	-0.4048
30	15	32605028	32821699	-0.4047
79	5	679849	841092	-0.4047
87	11	60970290	61008109	-0.4043
2	17	17714293	17714414	-0.4041
19	8	8085844	8090460	-0.404
54	10	69835215	69835323	-0.4036
92	8	92129661	92177481	-0.4035
5	1	200707086	200708027	-0.4034
12	19	33622953	33622961	-0.4033
52	11	55431584	55594854	-0.4031
31	5	171881549	171881583	-0.403
49	9	115841105	115851947	-0.4028
62	19	45873902	45874153	-0.4025
46	8	82754475	82754497	-0.4024
31	10	13142334	13143470	-0.4019
78	12	31271429	31272119	-0.4
51	22	39377790	39378425	-0.3995
35	19	35068710	35069691	-0.3992
55	5	140554610	140557583	-0.3988
8	6	32013699	32013710	-0.3986
9	2	122288370	122288388	-0.398
29	3	113465772	113465925	-0.3974
21	12	69753446	69753606	-0.3969
13	6	31364999	31367541	-0.3965
68	22	37975941	37976725	-0.3964
92	22	24373618	24384525	-0.3964
77	3	1809617	2004766	-0.3962
8	6	32121830	32121841	-0.3961
54	12	113229465	113229584	-0.3958
62	4	7184654	7187328	-0.3958
12	11	64546351	64546370	-0.3954
85	5	78202845	78224071	-0.3954
41	11	82095322	82115222	-0.3953
89	6	29855302	29855406	-0.3952
26	11	129903006	129903187	-0.3948
22	19	55309528	55327234	-0.3947
26	14	105186699	105187498	-0.3944
31	20	17673325	17674250	-0.3944
20	1	12893344	12908473	-0.3938
58	1	85040254	85040343	-0.3937
39	20	62151993	62152001	-0.3936
48	9	115835613	115851947	-0.3932
40	12	54402697	54402717	-0.3918
22	1	245710332	245710401	-0.3917
40	11	113659927	113659952	-0.3916
56	17	45177429	45177431	-0.3916
70	5	90679528	90679543	-0.3916
72	5	140554610	140557256	-0.3915
76	10	135122230	135122752	-0.3914
65	2	130955686	130956271	-0.3899
61	1	101360652	101360669	-0.3894
78	3	129107604	129116479	-0.3887
73	8	124780837	124780851	-0.3881
85	4	181463296	181480012	-0.388
19	6	32485396	32489801	-0.3876
25	19	49527060	49527905	-0.3874
29	6	168757168	168758843	-0.3873
60	6	31237013	31237664	-0.3872
5	20	60521757	60522664	-0.387
53	4	46391524	46391737	-0.3862
21	12	7781004	7781431	-0.3853
35	5	167718496	167718536	-0.3852
71	12	148077	149764	-0.3851
5	6	32032716	32032728	-0.385
65	7	143533786	143538037	-0.3849
16	12	132879967	132880790	-0.3847
48	3	49067045	49067097	-0.3845
20	1	12939180	12946833	-0.3843
85	4	109541622	109541635	-0.3843
50	10	69835215	69848268	-0.3839
13	6	31409319	31458944	-0.3834
54	6	31324512	31334836	-0.383
26	15	50716270	50716322	-0.3829
60	17	18379129	18432149	-0.3829
30	7	220911	231526	-0.3824
68	22	17489225	17489367	-0.3821
52	17	21279613	21279621	-0.3814
24	14	22694547	22958399	-0.3809
29	17	34641309	34757624	-0.3807
29	22	22312957	22465502	-0.3806
5	12	113229582	113229584	-0.3804
33	1	152506922	152553244	-0.3787
71	6	32121830	32121841	-0.3786
86	8	124780837	124780851	-0.3783
46	6	32032716	32032728	-0.377
77	10	1369114	1369823	-0.3767
15	11	134603744	134605862	-0.3766
86	17	75522182	75522449	-0.3765
51	11	82095322	82115222	-0.3764
29	7	102161506	102259241	-0.3763
36	13	27998603	27998621	-0.3761
17	8	7216871	7396283	-0.376
91	6	33032830	33039804	-0.376
31	1	85040254	85040343	-0.3752
40	1	161563355	161601053	-0.3749
50	7	143895753	144054288	-0.3748
89	15	34700272	34817982	-0.3747
31	1	148854572	148855760	-0.3745
84	12	57984920	57984923	-0.3741
75	7	143895753	144049427	-0.3738
40	8	2075469	2075820	-0.373
68	18	12703040	12703072	-0.373
12	1	161410551	161427101	-0.3726
30	8	92129661	92177481	-0.3724
29	17	18380159	18432149	-0.3723
22	1	161563355	161601053	-0.3722
2	6	25882463	25882590	-0.3718
15	19	55280577	55327234	-0.3716
16	22	22312957	22465502	-0.3715
73	6	31275664	31276664	-0.371
63	19	46623200	46628367	-0.3707
43	6	33032830	33039804	-0.3705
26	15	31664259	31664460	-0.3703
65	17	77454278	77454437	-0.3699
78	7	143270135	143317270	-0.3698
26	20	35402295	35402300	-0.3691
71	6	29648400	29648901	-0.3688
78	2	12147206	12147243	-0.3684
39	6	33757054	33757077	-0.3682
56	1	148933698	149187077	-0.3681
65	1	202091865	202091880	-0.368
9	5	140098174	140098496	-0.3679
23	3	21832523	22422855	-0.3679
29	7	101007190	101007442	-0.3674
46	20	62151993	62152001	-0.3674
8	14	62229147	62229171	-0.3671
75	6	29648400	29648901	-0.3668
14	6	30954962	30955142	-0.3667
4	3	194786218	194790434	-0.3665
57	16	21513691	21514953	-0.3663
59	1	25593055	25598878	-0.3663
32	4	7184654	7187328	-0.366
59	22	39377790	39378283	-0.3659
68	6	32528968	32548402	-0.3655
87	7	73257045	73257083	-0.3653
80	17	44394546	44702619	-0.3652
73	22	18668835	18737348	-0.3641
42	1	152506922	152553244	-0.3639
76	8	124780837	124780851	-0.3638
70	5	140554610	140557627	-0.3637
49	6	2999962	3000058	-0.3635
35	1	196743672	196795943	-0.3631
13	10	13142334	13143470	-0.3628
72	11	22453679	22454661	-0.3627
32	22	39377790	39378283	-0.3626
17	8	7650102	7754234	-0.3625
23	11	34517541	34523679	-0.3623
29	15	32605028	32729745	-0.3623
42	12	148077	149764	-0.3618
7	4	49297073	49308567	-0.3612
7	8	145497339	145501817	-0.3612
64	5	140556503	140557256	-0.3611
73	5	135416381	135416412	-0.3608
17	8	8085946	8086146	-0.3603
70	12	34258505	34261436	-0.3599
59	6	31364902	31439497	-0.3596
56	6	29648400	29648901	-0.3594
73	11	18955977	18957755	-0.3588
40	17	34597546	34641309	-0.3586
10	19	19431379	19431407	-0.3584
50	17	34597546	34758523	-0.3584
55	6	30654693	30654716	-0.3584
41	15	34700272	34817982	-0.3583
19	16	57769538	57769597	-0.3582
90	3	113465772	113465925	-0.3581
2	14	103593503	103593520	-0.3577
78	19	46623200	46628367	-0.3574
50	11	113659927	113659952	-0.3572
8	12	6241975	6243110	-0.3567
63	4	7184654	7187328	-0.3563
19	10	104263680	104263688	-0.356
58	16	1295309	1297816	-0.3559
59	8	92129661	92177481	-0.3557
65	1	161563355	161602335	-0.3556
34	4	7184654	7187328	-0.3554
89	14	74001118	74026160	-0.3553
76	11	7818165	7819874	-0.3552
61	5	180526995	180527697	-0.3547
60	5	140214372	140222253	-0.3546
65	1	19110922	19113523	-0.3532
69	11	60970290	61008109	-0.3529
18	5	176131019	176131052	-0.3527
13	12	54402697	54402717	-0.3526
82	17	71189054	71189066	-0.3526
37	5	140097950	140098496	-0.3524
87	5	106801945	106822849	-0.3521
88	21	40684731	40685208	-0.352
37	8	92129661	92177481	-0.3518
46	1	101488098	101830939	-0.3517
49	19	46623200	46628137	-0.3517
53	5	140554610	140557627	-0.3514
10	17	18379129	18432149	-0.3512
20	1	248753499	248791716	-0.3504
55	5	179740743	179741120	-0.3503
16	10	38739819	38739885	-0.3501
15	5	180670960	180671165	-0.35
64	8	8086144	8086607	-0.35
5	5	140554610	140557256	-0.3496
15	6	296538	379514	-0.3496
20	12	7781093	7781431	-0.3492
1	3	123602485	123607235	-0.3489
91	17	21279613	21279621	-0.3489
5	9	115841105	115851947	-0.3487
18	11	34517541	34523679	-0.3484
1	8	216453	216703	-0.348
40	5	90679528	90680542	-0.3477
7	12	26986520	26986763	-0.3473
83	17	18967111	19100051	-0.3473
59	5	171881546	171881583	-0.3472
3	6	296538	379514	-0.3468
55	6	10520874	10530035	-0.3461
71	20	62151993	62152001	-0.3458
78	4	7184654	7187328	-0.3458
88	4	46391532	46391737	-0.3458
70	6	29851755	29898751	-0.3456
12	8	124780837	124780851	-0.3454
72	16	84083975	84085290	-0.345
82	17	39150166	39155777	-0.3442
36	9	115822072	115851947	-0.3437
24	5	155351524	155548458	-0.3434
26	3	126260615	126261298	-0.3434
13	7	76126629	76149509	-0.3433
35	1	1677105	1677548	-0.3432
92	6	168757168	168758843	-0.3432
84	6	29851755	29898751	-0.343
52	8	144635309	144636113	-0.3428
74	6	296538	379514	-0.3427
86	5	140554610	140557256	-0.3423
45	5	140554610	140557256	-0.3419
60	12	54402697	54402717	-0.3418
59	4	71248310	71270447	-0.3416
36	22	17489225	17489367	-0.3415
2	5	140228182	140237879	-0.3408
89	4	132677675	132899460	-0.3405
60	5	140554610	140557256	-0.3403
73	7	57071509	57076951	-0.3403
63	12	7781093	7781431	-0.3401
25	14	19962440	20012038	-0.3398
85	6	32032716	32032728	-0.3398
11	15	34700272	34817982	-0.3397
79	14	50234605	50234671	-0.3393
45	6	31275643	31275881	-0.3391
85	13	114051373	114054316	-0.339
91	1	25593055	25660365	-0.3387
20	10	47599596	47652495	-0.3383
29	6	31347802	31458944	-0.3383
91	1	152770502	152777382	-0.3378
85	1	248753499	248791716	-0.3372
29	1	152538380	152553244	-0.3369
48	12	69753446	69753606	-0.3369
19	3	195423806	195460818	-0.3368
10	3	17583522	17686199	-0.3367
19	8	7650102	7754234	-0.3365
19	19	49197853	49207303	-0.3363
90	3	123602485	123607235	-0.3363
2	14	19600442	19614556	-0.3362
29	7	220911	232095	-0.3361
19	18	74499372	74499584	-0.3359
70	10	69835215	69835323	-0.3358
80	3	195489306	195489909	-0.3354
63	1	25593055	25598878	-0.3349
42	6	32032716	32032728	-0.3346
26	22	50528213	50528333	-0.3345
40	11	82095322	82115222	-0.3342
61	5	140556503	140557256	-0.3342
84	14	106791268	106806143	-0.3336
56	12	34258505	34261436	-0.3335
71	4	3726255	3726836	-0.3334
17	1	114697032	114697113	-0.3333
14	19	51107781	51108274	-0.3332
76	1	16810147	16810776	-0.3328
24	17	34597546	34641309	-0.3327
43	1	246139168	246140350	-0.3325
72	12	34258505	34261436	-0.3318
46	6	29648400	29648901	-0.3303
41	19	46389504	46389676	0.33
30	17	34626096	34641309	0.3301
36	18	74799495	74799572	0.3321
50	14	74001118	74003780	0.3325
26	15	52404977	52405026	0.3331
24	4	150999949	151000684	0.3335
38	6	31324916	31325427	0.3337
3	6	31237013	31239767	0.3341
3	6	31324916	31325817	0.3343
65	4	46391532	46391737	0.3346
2	14	101192634	101192860	0.3353
2	10	38738647	38739849	0.3359
43	7	25019893	25019943	0.3363
61	6	169225555	169226385	0.3363
80	13	95248882	95253676	0.3368
42	6	288505	297974	0.3369
90	6	32452388	32557404	0.337
24	15	26107658	26108412	0.3375
37	6	32632995	32633114	0.3375
86	12	69753446	69753606	0.3378
2	17	81052622	81052770	0.3379
40	6	32452388	32557404	0.3379
63	22	20342520	20502597	0.338
24	1	57111099	57111199	0.3384
50	6	32032716	32032728	0.3388
78	6	32032716	32032728	0.3389
67	14	74001118	74008259	0.339
35	8	8085496	8086607	0.3394
1	22	20342520	20502597	0.3396
24	4	13545639	13546292	0.3396
77	6	32452388	32557404	0.3403
62	10	38738941	38740029	0.3405
6	2	132202427	132203745	0.3406
42	6	31540114	31540136	0.3407
56	6	31237013	31239767	0.341
81	1	148000763	148025634	0.341
32	1	12908473	12940599	0.3411
43	18	44560277	44561725	0.3412
50	1	150313655	150333953	0.3415
47	7	57071509	57076951	0.3418
55	8	11986501	11997496	0.3419
83	6	288505	293285	0.3422
60	19	49527060	49527905	0.3423
73	8	215923	216788	0.3424
76	22	24348715	24384525	0.3427
75	18	2571313	2571394	0.3429
7	4	68265207	68265891	0.3432
8	1	31192151	31192165	0.3432
82	22	39377790	39378283	0.3435
70	6	32452388	32640493	0.3438
12	3	129799733	129804842	0.3439
86	12	113229465	113229584	0.3439
86	6	125474720	125474828	0.344
23	1	148000763	148025634	0.3441
57	22	24345907	24384525	0.3446
33	2	112812130	112812957	0.3447
17	12	113229534	113229584	0.3449
84	4	68265702	68265891	0.3453
19	19	9731811	9731957	0.3463
22	22	24348715	24384525	0.3463
91	10	135122230	135122752	0.3464
71	18	44560277	44561725	0.3465
90	14	20247697	20404281	0.3465
11	1	152770502	152777382	0.3466
89	6	291687	293331	0.3467
25	19	55309528	55327711	0.347
54	6	288505	293331	0.3477
33	8	125740429	125740498	0.3479
59	12	69753446	69753455	0.3479
51	6	32452388	32557404	0.3482
24	1	63789341	63790202	0.3485
33	14	20247697	20404281	0.3486
46	14	20215980	20404281	0.3496
57	1	148000579	148025634	0.3498
36	10	135122230	135122752	0.3505
33	18	77793812	77794335	0.351
87	6	291687	293285	0.3516
7	12	52586810	52596367	0.3517
48	22	24348715	24384525	0.3517
86	19	9731811	9731957	0.3518
16	5	140554610	140557256	0.3523
33	3	138739874	138740313	0.353
70	6	31461748	31461999	0.354
71	6	29924256	29924310	0.3545
15	7	101007190	101007442	0.355
13	14	41623577	41623854	0.3557
75	18	74799495	74799572	0.3562
69	17	18965580	19015961	0.3565
34	1	74663297	74663827	0.3566
42	19	55309528	55327711	0.3572
62	5	140554610	140557583	0.3574
31	10	135254748	135259199	0.3576
87	6	31237013	31240223	0.3578
84	8	82754475	82754900	0.3581
2	12	247224	247315	0.3584
20	22	50531970	50585197	0.3584
16	6	288505	293331	0.3589
91	6	26914441	26924550	0.359
74	1	150315420	150333953	0.3592
67	20	60520624	60522664	0.3594
18	1	12908455	12940599	0.3596
83	6	31324565	31364942	0.3603
88	3	129799733	129804842	0.3611
26	6	31237013	31239767	0.3614
35	13	112817661	112818596	0.3615
30	9	115835613	115851947	0.3617
27	19	55309528	55327711	0.3624
78	5	646259	650104	0.3629
61	12	69753446	69753455	0.363
48	17	55038508	55038524	0.3638
35	6	32452388	32557404	0.364
7	19	49527060	49527905	0.3642
36	4	10147038	10147330	0.3648
73	14	101192634	101192860	0.3657
14	2	132202427	132202537	0.3664
8	6	41068646	41068752	0.3672
90	22	24373054	24381773	0.3673
52	10	69835215	69835323	0.3674
36	6	171033352	171036378	0.3675
9	10	135122020	135122788	0.3677
77	10	1411072	1416142	0.3684
7	5	140554610	140557256	0.3687
20	6	74363884	74363888	0.3688
28	7	57071676	57076951	0.3694
66	1	935456	936229	0.3694
46	10	135122230	135122752	0.3698
24	15	32607923	32639549	0.3705
3	14	99641017	99641151	0.3709
67	1	31192151	31192165	0.371
15	13	112817661	112818596	0.3711
42	14	103389017	103389022	0.3722
65	5	1594282	1594808	0.3723
82	9	115835613	115841081	0.3723
34	9	115835613	115841081	0.3726
74	6	171033352	171036378	0.3727
19	22	24348715	24384525	0.373
73	11	1312565	1312923	0.3732
86	6	290800	293285	0.3734
29	3	129799733	129800573	0.3736
57	17	79479815	79479834	0.3739
35	1	3028485	3028813	0.3743
31	1	148000579	148025634	0.3745
40	17	55038508	55038524	0.3747
81	12	54402697	54402717	0.3748
8	10	135122230	135122752	0.3749
50	6	30038998	30039476	0.375
56	19	46389504	46389676	0.375
36	6	41068553	41068752	0.3755
81	1	65613383	65613392	0.3761
42	8	141348866	141349212	0.3773
35	8	135476712	135477810	0.3787
21	6	41068646	41068752	0.3794
81	17	55038508	55038524	0.3799
1	5	140554610	140557256	0.3801
23	16	88263144	88263263	0.3801
64	22	24348715	24384525	0.3802
80	10	38739819	38739885	0.3804
7	19	46389504	46389676	0.3811
81	6	125474805	125474808	0.3813
29	6	74363879	74363888	0.3819
8	11	61007964	61008041	0.382
67	19	55309528	55327234	0.382
81	14	74001118	74003780	0.3822
20	10	69835215	69848268	0.3831
91	4	10147038	10147330	0.3831
81	3	53926056	53926101	0.3842
92	6	32633015	32633163	0.3846
25	12	113229465	113229584	0.3849
33	3	128840619	128840836	0.3852
40	1	148000763	148025634	0.3852
50	17	55038508	55038524	0.3852
53	7	64043012	64043193	0.3855
73	6	32032716	32032728	0.386
5	6	32452388	32557404	0.3861
87	2	132202427	132202537	0.3861
12	3	157122686	157152139	0.3862
61	14	101192634	101192860	0.3864
72	5	180396687	180428536	0.3865
3	2	132202427	132218302	0.387
31	9	115835613	115851947	0.3884
49	13	95248882	95253676	0.3884
62	12	113229465	113229584	0.3887
23	11	86142407	86142587	0.3889
8	8	141348866	141349212	0.39
40	10	2563644	2565606	0.3913
21	6	288505	293331	0.3916
28	6	49917254	49917872	0.3918
63	1	248100345	248100585	0.3918
19	16	55850985	55851398	0.3919
25	20	2633340	2633362	0.3924
24	1	110230252	110230545	0.3928
52	6	288505	292823	0.3934
19	5	180396687	180428536	0.3942
24	14	92790072	92790285	0.3949
55	10	71389949	71389956	0.3949
92	21	41554681	41554930	0.3951
18	12	113229465	113229584	0.3953
54	7	143895753	144049427	0.3968
76	14	20247697	20444164	0.397
9	22	24348715	24384525	0.3975
73	12	247224	247315	0.3975
7	7	73257045	73257083	0.3977
67	8	82754313	82754900	0.3989
33	15	65669594	65669821	0.3991
51	6	31324916	31347802	0.3993
48	5	140554610	140557256	0.3994
6	6	31324916	31347802	0.3996
24	22	38851345	38851366	0.3999
33	2	132202427	132202537	0.4007
35	15	65669594	65669821	0.4007
81	6	31324916	31325817	0.4007
7	6	288505	293331	0.401
88	12	54402697	54402717	0.401
27	10	2563965	2565606	0.4011
53	5	180396687	180428536	0.4013
61	22	24372133	24384525	0.4019
74	5	180396687	180428536	0.4022
39	6	31126267	31126284	0.403
34	4	9475346	9479622	0.4036
68	6	32032716	32032728	0.4036
43	12	54402697	54402717	0.4038
43	1	148000763	148025634	0.4044
47	8	8086144	8086607	0.4047
5	10	69835215	69835323	0.4051
60	1	38157962	38157968	0.4053
57	9	115835613	115841081	0.4067
76	17	929653	933155	0.4071
63	5	140554610	140557256	0.4077
67	2	132202427	132202537	0.408
22	6	170484120	170487311	0.4081
86	19	10172712	10172899	0.4086
90	11	70257035	70257059	0.4086
74	9	140153393	140156185	0.4089
26	6	31324916	31325455	0.409
45	1	182361500	182361528	0.409
56	9	115835613	115841081	0.409
26	8	135476917	135477810	0.4092
59	1	152770502	152777382	0.4093
73	3	129799733	129804842	0.4096
70	8	82754387	82754900	0.4098
69	10	69835215	69835323	0.4101
61	12	247224	247315	0.4103
55	6	74363879	74363888	0.4106
80	20	2188420	2188511	0.4107
70	19	46389504	46389676	0.4108
91	17	45177429	45177431	0.4112
10	3	129799733	129804842	0.4114
5	11	61007964	61008041	0.4115
75	1	65613383	65613392	0.4115
2	10	135122230	135122752	0.4116
26	12	247224	247315	0.4123
78	15	93616943	93616966	0.4128
61	10	69835215	69835323	0.4131
39	6	31459901	31461999	0.414
4	19	10172712	10172899	0.4142
40	14	41623577	41623629	0.4145
68	5	140554610	140557627	0.4145
7	5	180396687	180428536	0.4149
3	17	55038508	55038524	0.4151
13	12	130968391	130968614	0.4159
38	19	49527060	49527905	0.4166
2	6	291687	292596	0.4172
37	6	288505	293331	0.4173
82	7	25019893	25019943	0.4176
38	4	68265702	68265891	0.4178
39	18	44560277	44561725	0.418
84	4	46391532	46391737	0.418
59	5	140554610	140557256	0.4183
51	17	55038508	55038524	0.4185
27	10	135122230	135122752	0.4187
68	18	56802613	56806343	0.4187
44	4	46391694	46391737	0.419
2	17	71189054	71189068	0.4202
50	6	31164914	31164924	0.4203
14	6	31126267	31126284	0.4205
89	9	115835613	115841081	0.4207
25	18	44561130	44561725	0.4211
65	1	65613383	65613392	0.4213
56	18	74799495	74799500	0.4214
83	6	33038032	33039414	0.4215
82	5	140554610	140557256	0.4219
56	4	187111841	187111853	0.4221
81	14	103389017	103389022	0.4229
3	6	41068646	41068752	0.423
19	10	69835215	69835323	0.423
28	10	69835215	69835323	0.4231
8	12	53473297	53473299	0.4251
11	17	71189054	71189066	0.4255
58	19	46389504	46389676	0.4255
72	7	154453651	154455411	0.4262
24	1	935456	936229	0.4267
39	6	41068646	41068752	0.4272
62	10	69835215	69835323	0.4274
20	5	140554610	140557256	0.4276
26	14	101192634	101192860	0.4277
55	14	74001118	74026160	0.4283
25	6	31164378	31164924	0.4287
52	17	85360	85492	0.4294
25	6	41068646	41068752	0.4297
9	12	102457300	102459329	0.43
12	1	148933698	149212246	0.431
63	19	55309528	55314972	0.4311
20	3	53926056	53926101	0.4316
22	6	291687	293331	0.4317
40	22	24348715	24384525	0.4317
40	10	73004576	73004610	0.4331
43	22	18669132	18737348	0.4333
43	1	231176985	231176991	0.4336
80	12	9436616	9437009	0.4347
56	14	41623577	41623629	0.435
31	5	140554610	140557256	0.4351
72	10	69835215	69835323	0.4352
1	12	54402697	54402717	0.4361
39	6	33356860	33358040	0.4362
14	6	31237013	31239767	0.4365
45	11	70257035	70257059	0.4366
27	12	113229465	113229584	0.4369
33	13	112817661	112818596	0.437
88	6	31164378	31164924	0.437
65	13	114890416	114890515	0.4371
69	1	74663297	74663827	0.4372
92	3	129800573	129804842	0.4373
15	7	158059142	158059179	0.4374
59	8	2075469	2075820	0.4375
75	10	69835215	69835323	0.4375
75	9	115835613	115841081	0.4377
3	14	41623577	41623629	0.438
28	20	2633340	2633362	0.4382
36	22	24348715	24381773	0.4387
88	13	61490935	61491000	0.4392
21	4	187111841	187111853	0.4404
67	10	73004576	73004610	0.4407
8	11	70257035	70257059	0.4408
47	2	132202427	132202537	0.4419
29	5	180396687	180408809	0.442
60	14	74001118	74003780	0.442
2	15	75095006	75095272	0.4422
40	6	31126267	31126284	0.4422
67	14	41623577	41623629	0.4423
71	6	7390083	7390091	0.4425
53	16	83967363	83968316	0.4428
11	18	77568900	77568902	0.4429
8	6	7390083	7390091	0.4431
24	5	148033708	148034045	0.444
11	14	41623577	41623629	0.4442
35	22	24373054	24384525	0.4443
36	6	30039403	30039442	0.4443
39	16	83967363	83968316	0.4443
26	11	858840	859915	0.4452
24	13	110959356	110960177	0.4454
16	14	20215980	20404281	0.446
16	14	74001118	74008259	0.4466
33	8	8085844	8086607	0.4466
28	5	69345099	69483768	0.4476
18	12	19282349	19282374	0.4479
45	6	31126267	31126284	0.4485
88	10	135122230	135122752	0.4485
73	6	33356860	33358040	0.4488
85	12	113229465	113229584	0.449
55	10	38739819	38739885	0.4491
56	6	31324916	31325817	0.4496
38	22	24348715	24384525	0.4498
78	6	74363775	74363888	0.45
54	19	55309528	55327234	0.4501
64	5	646259	650104	0.4508
38	1	152770502	152777382	0.4509
74	12	54402697	54402717	0.4512
43	6	31324916	31325817	0.4514
8	19	10172841	10172899	0.4519
66	10	135122230	135122237	0.452
56	3	46718979	46718990	0.4524
77	6	29894141	29894248	0.4526
53	9	115835613	115841081	0.4528
12	5	179071604	179071901	0.4532
19	6	31164776	31164947	0.4533
4	9	115835613	115841081	0.4544
20	6	31509402	31509427	0.4554
25	10	69835215	69835323	0.4559
8	6	288505	293331	0.4565
46	5	180396687	180408809	0.4565
18	5	180396687	180408809	0.4574
32	10	12999599	12999618	0.4574
87	22	24348715	24384525	0.4575
41	11	70257035	70257059	0.4578
8	2	132202427	132202537	0.458
1	15	102511865	102520452	0.4598
74	9	115835613	115841081	0.4598
7	14	41623577	41623629	0.4599
35	14	101192634	101192860	0.4599
43	15	78632859	78632861	0.46
29	5	140554610	140557583	0.4602
83	10	1411072	1415977	0.4605
26	4	1762881	1763211	0.4611
68	19	49527060	49527905	0.4618
43	1	85462885	85462892	0.4623
1	17	77454278	77454437	0.463
43	4	9475346	9479622	0.4631
81	11	236781	236787	0.4631
72	22	16286998	16292001	0.4639
23	20	2633340	2633362	0.4651
24	14	74001118	74008259	0.4651
12	11	70257035	70257059	0.4654
85	12	12878428	12878440	0.4658
33	14	101192634	101192860	0.4663
13	22	24348715	24384525	0.4668
40	16	18482212	18487960	0.467
84	7	134855689	134855695	0.467
25	7	73257045	73257083	0.4673
51	17	77454278	77454437	0.4673
55	6	31276664	31276669	0.4674
10	19	10172841	10172899	0.4678
58	5	1663755	1664252	0.468
53	6	161561066	161561121	0.4681
23	12	12878428	12878440	0.4687
8	11	17036137	17036142	0.4695
17	20	2633340	2633362	0.4696
13	10	71389949	71389956	0.4702
60	6	31324916	31325000	0.4703
73	17	55038508	55038524	0.4704
25	14	74001118	74026915	0.4706
85	11	70257035	70257059	0.4707
4	12	132879967	132880128	0.4712
20	11	70257035	70257059	0.4715
28	2	2726437	2726500	0.4719
12	5	180396687	180428536	0.4722
70	17	76970857	76970864	0.4723
15	13	107220655	107220663	0.4724
21	6	125474805	125474808	0.4725
23	12	54402697	54402717	0.4725
52	10	12999599	12999618	0.4729
14	6	31461748	31461999	0.4743
66	12	113229465	113229584	0.4744
48	5	180396687	180408809	0.4745
75	8	82754475	82754900	0.4748
75	5	180396687	180408809	0.475
83	14	41623577	41623629	0.475
82	1	38157909	38157968	0.4753
2	8	135476917	135477810	0.4756
25	19	46389504	46389676	0.4756
24	1	152770502	152777382	0.4759
8	22	24348715	24384525	0.4761
15	22	24348715	24384525	0.4763
92	3	46718979	46718990	0.4763
69	5	180396687	180408809	0.4764
60	8	145845260	145845573	0.477
26	17	78809403	78809873	0.4783
87	5	180396687	180428536	0.4789
84	5	180396687	180408785	0.479
44	10	12999599	12999618	0.4793
31	6	290800	293285	0.4795
27	12	132879967	132880790	0.4796
46	16	1306340	1306346	0.4822
34	14	41623577	41623629	0.4837
79	3	44803084	44803129	0.4837
43	20	2188420	2188511	0.4839
18	17	55038508	55038524	0.4845
24	19	49527060	49527905	0.4847
50	6	74363879	74363888	0.4851
29	17	61851458	61851465	0.4859
29	11	122192427	122198071	0.4871
5	14	41623577	41623629	0.4874
18	3	129800573	129804842	0.4874
39	6	32452388	32640493	0.4883
37	3	46718979	46718990	0.4887
2	13	114840743	114841904	0.489
35	19	49527060	49527761	0.489
41	11	18956196	18957755	0.4899
6	7	56434951	56437746	0.49
28	10	71389949	71389956	0.49
89	7	73257045	73257083	0.4907
29	3	44803084	44803129	0.4908
7	4	42400885	42401056	0.4914
20	4	46391694	46391737	0.4916
70	7	73257045	73257083	0.493
7	1	171787181	171807195	0.4931
26	17	79051893	79052445	0.4936
30	17	78809403	78809873	0.4939
68	6	288505	293331	0.4945
63	14	74001118	74026915	0.4952
35	9	115835613	115841081	0.4956
28	19	49527060	49527905	0.4958
71	12	54402697	54402717	0.4964
33	12	132879967	132882028	0.4965
38	4	187111841	187111853	0.4979
57	7	76624761	76625569	0.4981
64	12	113229582	113229584	0.4982
30	11	70257035	70257059	0.4983
33	8	135476712	135477810	0.4987
61	2	131975750	131975771	0.4992
70	6	32032716	32032728	0.4992
53	10	71389949	71389959	0.4999
56	19	49990766	49990808	0.4999
55	5	179071604	179071901	0.5
78	1	2415344	2415453	0.5002
6	14	41623577	41623629	0.5004
55	7	73257045	73257083	0.5008
30	8	82754387	82754900	0.5013
2	17	79051613	79052445	0.5015
8	12	113229534	113229584	0.5019
10	9	115835613	115841081	0.5027
7	1	85462885	85462892	0.5029
1	16	1306340	1306346	0.5053
91	7	73257045	73257083	0.5062
11	17	19015401	19030144	0.5068
66	7	73257045	73257083	0.5069
70	1	152770502	152777382	0.5072
23	11	17036137	17036142	0.5078
37	3	44803084	44803129	0.5078
62	5	180396687	180428536	0.5078
12	6	29894152	29894248	0.508
61	17	55038508	55038524	0.5081
73	10	135254748	135254792	0.5089
67	7	73257045	73257083	0.5101
3	2	1358283	1358513	0.5105
62	14	74001118	74003780	0.5109
82	6	7390083	7390091	0.5109
18	15	74023856	74024097	0.5112
18	19	12876846	12877000	0.5115
33	17	79051613	79052445	0.5129
16	17	79905219	79905263	0.5131
33	4	1762881	1763211	0.5142
82	6	171033352	171036378	0.5153
61	7	1113237	1114381	0.5156
27	3	44803084	44803129	0.5159
82	5	180396687	180428536	0.5162
3	1	13737234	13737267	0.5173
14	5	180396687	180428536	0.5173
35	17	78809403	78809873	0.5177
77	10	69835215	69835323	0.5184
12	6	7390083	7390091	0.5185
3	13	107220655	107220663	0.5186
40	3	44803084	44803129	0.5192
10	10	135122230	135122237	0.5198
67	5	180396687	180428536	0.5202
61	17	70120411	70120541	0.5217
34	3	44803084	44803129	0.5219
62	11	70257035	70257059	0.5236
85	10	71389949	71389956	0.5236
22	5	140554610	140557256	0.5241
[truncated: 410 more rows]

## Sheet: CNA frequency....
sample name	CNA frequency	U-As	samples classified as low U-As=1 or high U-As=2
1	27	200.1	2
2	38	658.3	2
3	31	542.5	2
4	25	297.3	2
5	32	178.7	1
6	24	254.9	2
7	31	1251.2	2
8	36	270.4	2
9	31	230.1	2
10	34	396.4	2
11	26	268.3	2
12	41	321.9	2
13	28	465.2	2
14	16	239.1	2
15	26	607	2
16	25	312.3	2
17	29	171.1	1
18	25	308.4	2
19	24	490	2
20	32	359.4	2
21	23	373.1	2
22	23	197.2	2
23	24	166.9	1
24	33	306	2
25	26	296.4	2
26	44	463.5	2
27	18	174.6	1
28	24	357.3	2
29	42	240.4	2
30	25	390.2	2
31	28	661.4	2
32	27	355.5	2
33	45	663.8	2
34	18	175.9	1
35	29	263.5	2
36	22	243.8	2
37	29	376.4	2
38	22	267.5	2
39	20	591.8	2
40	34	461.4	2
41	19	382.5	2
42	21	24.1	1
43	26	118.2	1
44	13	10.1	1
45	19	20.7	1
46	22	110.5	1
47	23	24.9	1
48	20	22.4	1
49	26	26.3	1
50	32	81.7	1
51	21	19.2	1
52	20	11.2	1
53	25	18.1	1
54	24	16.4	1
55	33	14.7	1
56	30	38.6	1
57	23	29.3	1
58	24	73.2	1
59	27	117.2	1
60	23	26.5	1
61	29	115.5	1
62	23	42.6	1
63	23	21.4	1
64	23	32.5	1
65	32	18	1
66	17	13.8	1
67	24	35	1
68	24	30.3	1
69	20	24.4	1
70	32	56.2	1
71	29	51.8	1
72	30	123.4	1
73	38	172.2	1
74	23	180.8	1
75	26	83.6	1
76	24	170.2	1
77	22	161.3	1
78	25	221.7	2
79	21	191	2
80	25	274.3	2
81	28	167.5	1
82	26	255.4	2
83	32	140.3	1
84	20	209.3	2
85	16	146	1
86	41	206.9	2
87	22	185	1
88	28	260.2	2
89	17	276.2	2
90	13	384.4	2
91	23	145.5	1
92	25	436.8	2

## Sheet: mostr_common_CNA_output
chr	start	end	number.overlap	proportion.overlap	proportion.positive
17	78809852	78809873	59	0.335227	0
17	78809403	78809852	57	0.323864	0
5	140556503	140557227	51	0.291429	0.0114286
5	140557227	140557256	50	0.285714	0.0116618
5	140554610	140556503	48	0.274286	0.0121581
22	24373054	24373484	47	0.552941	0.00973783
22	24373484	24373618	47	0.552941	0.00974513
22	24373618	24374012	43	0.505882	0.010647
22	24374012	24381773	42	0.494118	0.0108969
9	115835613	115835616	39	0.866667	0.00479386
5	180396687	180408785	38	0.217143	0.00968992
7	73257045	73257083	38	0.296875	0.00564972
10	69835215	69835323	38	0.238994	0.0104167
10	71389949	71389956	34	0.213836	0.0116054
12	113229582	113229584	34	0.213836	0.00195695
22	24381773	24384525	34	0.4	0.0124224
14	41623577	41623629	30	0.379747	0.00110011
22	24372133	24373054	30	0.352941	0.0152047
22	24348715	24372133	29	0.341176	0.0157195
3	44803084	44803129	28	0.254545	0.0114566
9	115835616	115841081	28	0.622222	0.00467602
16	15951224	15951230	28	0.333333	0.00248756
2	114260766	114261270	25	0.403226	0.00930714
6	74363884	74363888	25	0.0825083	0.00507614
1	152770502	152770520	23	0.0845588	0.025
6	32032716	32032728	23	0.0759076	0.010929
5	180408785	180408809	22	0.125714	0.0171821
6	74363879	74363884	22	0.0726073	0.00578035
10	12999599	12999618	21	0.132075	0
11	70257035	70257059	21	0.207921	0.0140281
12	54402697	54402717	21	0.132075	0.003125
1	152770520	152777382	20	0.0735294	0.0229885
10	135122230	135122232	19	0.119497	0
1	228756711	228756714	18	0.0661765	0
6	291687	292596	18	0.0594059	0.0208333
6	32489991	32490444	18	0.0594059	0
17	55038508	55038524	18	0.102273	0.0240964
6	292596	292823	17	0.0561056	0.0220588
10	135122232	135122237	17	0.106918	0
1	31192151	31192158	16	0.0588235	0
1	182361507	182361509	16	0.0588235	0.00724638
3	129800573	129804842	16	0.145455	0.0114613
1	13737234	13737267	15	0.0551471	0.00746269
1	31192158	31192165	15	0.0551471	0
6	292823	293285	15	0.049505	0.0166667
6	32489750	32489801	15	0.049505	0
17	79905255	79905263	15	0.0852273	0
19	49527060	49527339	15	0.11811	0.00350877
19	53290079	53290102	15	0.11811	0.00701754
6	31148606	31148612	14	0.0462046	0
6	32489555	32489750	14	0.0462046	0
6	32489801	32489991	14	0.0462046	0
8	8086144	8086146	14	0.138614	0.00606061
12	113229534	113229582	14	0.0880503	0
14	74001118	74003780	14	0.177215	0.00707547
16	88263261	88263263	14	0.166667	0.0025
4	42400885	42401056	13	0.144444	0
5	180408809	180428536	13	0.0742857	0.0287356
6	31324916	31325000	13	0.0429043	0.00961538
6	32633102	32633114	13	0.0429043	0.00970874
10	135122237	135122752	13	0.081761	0
20	2633340	2633362	13	0.288889	0
3	53926056	53926101	12	0.109091	0.0153257
4	46391694	46391737	12	0.133333	0.0124224
6	290800	291687	12	0.039604	0.0104167
6	32489553	32489555	12	0.039604	0
6	32633114	32633163	12	0.039604	0.0105263
6	171033352	171036378	12	0.039604	0.0210526
8	82754475	82754497	12	0.118812	0.0140351
11	18956196	18956283	12	0.118812	0
12	113229465	113229534	12	0.0754717	0
19	6737490	6737494	12	0.0944882	0.0311111
19	49527339	49527761	12	0.0944882	0.00438596
1	2415344	2415453	11	0.0404412	0.0212766
1	47799633	47799638	11	0.0404412	0
1	121467175	121472061	11	0.0404412	0.0102041
5	140557256	140557583	11	0.0628571	0.0130719
6	293285	293331	11	0.0363036	0.0227273
6	31276667	31276669	11	0.0363036	0
6	31325000	31325427	11	0.0363036	0.0113636
6	32546665	32548402	11	0.0363036	0
12	69753446	69753455	11	0.0691824	0
17	79792929	79792936	11	0.0625	0
19	49527761	49527905	11	0.0866142	0.00478469
19	55309528	55314972	11	0.0866142	0
1	12908861	12919079	10	0.0367647	0
1	85462885	85462892	10	0.0367647	0.0229885
3	129799733	129800573	10	0.0909091	0
6	288505	290800	10	0.0330033	0.0125
6	29894228	29894248	10	0.0330033	0.0125
6	30039376	30039380	10	0.0330033	0
6	31325427	31325455	10	0.0330033	0.0125
6	32528968	32546665	10	0.0330033	0
6	32632331	32632338	10	0.0330033	0
9	115841105	115851947	10	0.222222	0.012987
16	1306340	1306346	10	0.119048	0
16	83967545	83968316	10	0.119048	0
19	45874111	45874153	10	0.0787402	0
19	55314972	55315034	10	0.0787402	0
1	148000763	148025634	9	0.0330882	0.0123457
5	649884	650104	9	0.0514286	0.008
6	31325455	31325817	9	0.029703	0.0138889
6	32485396	32489553	9	0.029703	0
7	25019893	25019943	9	0.0703125	0.0116959
8	82754497	82754900	9	0.0891089	0.0187793
11	18956283	18957755	9	0.0891089	0
12	12503455	12503457	9	0.0566038	0.0283688
12	69753455	69753606	9	0.0566038	0
17	45177429	45177431	9	0.0511364	0.00793651
19	55315034	55327234	9	0.0708661	0
1	12939180	12940599	8	0.0294118	0
1	180992098	180992117	8	0.0294118	0
1	200707086	200708027	8	0.0294118	0
2	132202427	132202537	8	0.129032	0
4	7750480	7750489	8	0.0888889	0
6	31239243	31239247	8	0.0264026	0.015873
6	31276664	31276667	8	0.0264026	0
6	32452388	32485396	8	0.0264026	0
6	32490444	32528968	8	0.0264026	0
6	32548402	32557404	8	0.0264026	0
6	32633015	32633102	8	0.0264026	0.015625
7	158046838	158047359	8	0.0625	0
8	6940591	6940624	8	0.0792079	0
11	61007964	61008041	8	0.0792079	0.0105263
13	107220655	107220663	8	0.285714	0.00872093
17	34599556	34626096	8	0.0454545	0
17	34626096	34639626	8	0.0454545	0.00900901
17	79791791	79792929	8	0.0454545	0
19	33667906	33667908	8	0.0629921	0.0197368
19	46389504	46389521	8	0.0629921	0
22	39378224	39378283	8	0.0941176	0
1	12908455	12908473	7	0.0257353	0
1	12908473	12908861	7	0.0257353	0
1	12919079	12939180	7	0.0257353	0
1	21023073	21023132	7	0.0257353	0
1	65613383	65613392	7	0.0257353	0
1	171787181	171807195	7	0.0257353	0.0172414
4	7184654	7187328	7	0.0777778	0
4	132677675	132677681	7	0.0777778	0.00534759
5	135416381	135416412	7	0.04	0
5	167718524	167718536	7	0.04	0
6	31237013	31237199	7	0.0231023	0
6	31237199	31237664	7	0.0231023	0
6	31239247	31239324	7	0.0231023	0.0181818
6	32632961	32632992	7	0.0231023	0.0178571
8	92129661	92177481	7	0.0693069	0
9	115841081	115841105	7	0.155556	0.0106101
10	2563965	2564866	7	0.0440252	0
11	128105129	128107248	7	0.0693069	0
12	7781093	7781431	7	0.0440252	0
12	50794550	50794574	7	0.0440252	0.0186916
12	132879967	132880128	7	0.0440252	0
14	74003780	74008259	7	0.0886076	0.00471698
15	78632859	78632861	7	0.166667	0.00498753
17	19030144	19030146	7	0.0397727	0
17	71189054	71189066	7	0.0397727	0.0204082
19	46389521	46389676	7	0.0551181	0
20	1206693	1206700	7	0.155556	0.0026455
22	39377790	39378224	7	0.0823529	0
1	1916894	1917911	6	0.0220588	0
1	152538380	152553244	6	0.0220588	0
1	155202674	155202685	6	0.0220588	0
4	68265702	68265802	6	0.0666667	0.0185185
4	187111841	187111853	6	0.0666667	0
5	90679528	90679543	6	0.0342857	0
5	140557583	140557627	6	0.0342857	0.0119048
5	152022470	152029980	6	0.0342857	0
6	32632937	32632961	6	0.019802	0
6	32632992	32632995	6	0.019802	0.0208333
6	32632995	32633015	6	0.019802	0.0208333
6	41068646	41068752	6	0.019802	0
7	32535165	32535168	6	0.046875	0
8	6826392	6837932	6	0.0594059	0
8	8086146	8086607	6	0.0594059	0.0138889
11	18955977	18956196	6	0.0594059	0
11	118902213	118902351	6	0.0594059	0
14	101192634	101192860	6	0.0759494	0.0163934
14	103389017	103389022	6	0.0759494	0.00540541
17	34597546	34599556	6	0.0340909	0
17	34639626	34641309	6	0.0340909	0.0120482
19	4607318	4607324	6	0.0472441	0
20	60521757	60522664	6	0.133333	0.0124224
21	42219202	42219221	6	0.5	0.00497512
1	12940599	12946833	5	0.0183824	0
1	101360652	101360669	5	0.0183824	0
2	130956098	130956119	5	0.0806452	0
3	194785978	194786218	5	0.0454545	0
3	194786218	194786989	5	0.0454545	0
4	109541622	109541635	5	0.0555556	0
5	1003099	1003134	5	0.0285714	0
5	1663755	1663986	5	0.0285714	0
6	29894197	29894228	5	0.0165017	0.025
6	31126267	31126273	5	0.0165017	0
6	31237664	31239243	5	0.0165017	0
6	31239324	31239767	5	0.0165017	0
6	32632106	32632331	5	0.0165017	0
6	32632639	32632643	5	0.0165017	0
6	32632848	32632937	5	0.0165017	0
7	32535168	32535189	5	0.0390625	0
7	75957061	75957202	5	0.0390625	0
7	143895753	144049427	5	0.0390625	0.0105263
7	152622445	152622455	5	0.0390625	0
8	8085946	8086144	5	0.049505	0.00833333
8	124780837	124780849	5	0.049505	0
8	145499436	145501817	5	0.049505	0
10	38739819	38739849	5	0.0314465	0
10	104263680	104263688	5	0.0314465	0
11	236781	236787	5	0.049505	0.00862069
11	113846918	113846937	5	0.049505	0
12	9436616	9436621	5	0.0314465	0.0131579
12	9436621	9437009	5	0.0314465	0
12	31272112	31272119	5	0.0314465	0
12	133009863	133009956	5	0.0314465	0.0506329
14	20247697	20404281	5	0.0632911	0.0196078
15	69744829	69744850	5	0.119048	0.0138408
17	18380159	18432149	5	0.0284091	0
17	61851458	61851465	5	0.0284091	0
18	74799495	74799500	5	0.192308	0.0021692
22	45148218	45148229	5	0.0588235	0
1	152506922	152538380	4	0.0147059	0
1	161563355	161591659	4	0.0147059	0
1	248753499	248791716	4	0.0147059	0
2	130955686	130956098	4	0.0645161	0
2	241629829	241631239	4	0.0645161	0.00641026
3	46718979	46718990	4	0.0363636	0
3	194786989	194790434	4	0.0363636	0
3	195423806	195447691	4	0.0363636	0
4	46391532	46391694	4	0.0444444	0.0277778
4	68265207	68265702	4	0.0444444	0.00925926
4	68265802	68265891	4	0.0444444	0.0277778
4	132677681	132683397	4	0.0444444	0.00925926
5	1663986	1664252	4	0.0228571	0
5	135416331	135416381	4	0.0228571	0
6	296538	297974	4	0.0132013	0
6	5004368	5004418	4	0.0132013	0
6	7390083	7390091	4	0.0132013	0.0625
6	29648400	29648901	4	0.0132013	0
6	29796086	29796124	4	0.0132013	0
6	29855302	29855406	4	0.0132013	0
6	29894152	29894197	4	0.0132013	0.03125
6	30039432	30039442	4	0.0132013	0
6	31126273	31126284	4	0.0132013	0
6	31164914	31164924	4	0.0132013	0
6	31325817	31334836	4	0.0132013	0
6	31364902	31364942	4	0.0132013	0
6	31364999	31367541	4	0.0132013	0
6	31409319	31439497	4	0.0132013	0
6	32121830	32121841	4	0.0132013	0
6	32632338	32632639	4	0.0132013	0
6	32632643	32632848	4	0.0132013	0
7	62809373	62859493	4	0.03125	0
7	134855689	134855695	4	0.03125	0.0131579
8	216578	216703	4	0.039604	0.0105263
8	8085844	8085946	4	0.039604	0.0104167
8	11986933	11996937	4	0.039604	0
8	82754387	82754475	4	0.039604	0.03125
8	124780849	124780851	4	0.039604	0
8	135476917	135477810	4	0.039604	0.0416667
8	145497339	145499436	4	0.039604	0
10	2564866	2565606	4	0.0251572	0
10	38739849	38739885	4	0.0251572	0
10	70091615	70091617	4	0.0251572	0.0163934
11	113659927	113659952	4	0.039604	0
11	131780278	131780334	4	0.039604	0
12	247224	247315	4	0.0251572	0
12	31271783	31272112	4	0.0251572	0
12	54355460	54355476	4	0.0251572	0.0163934
12	132880128	132880790	4	0.0251572	0
14	74008259	74026160	4	0.0506329	0
15	75095171	75095272	4	0.0952381	0
15	75287824	75287851	4	0.0952381	0.0172414
17	18379129	18380159	4	0.0227273	0
17	77454278	77454437	4	0.0227273	0
18	44561130	44561725	4	0.153846	0.00540541
18	56802613	56806343	4	0.153846	0.00539084
19	10172841	10172899	4	0.0314961	0
19	45874080	45874111	4	0.0314961	0
19	46623200	46628137	4	0.0314961	0
19	54494652	54494658	4	0.0314961	0.0266667
20	32031702	32031707	4	0.0888889	0.00925926
20	60520624	60521757	4	0.0888889	0.0139535
1	12893344	12908455	3	0.0110294	0
1	25593055	25598878	3	0.0110294	0
1	41350183	41350292	3	0.0110294	0
1	54355906	54358446	3	0.0110294	0
1	149069731	149187077	3	0.0110294	0
1	161591659	161601053	3	0.0110294	0
2	495143	495773	3	0.0483871	0.0172414
2	130956119	130956255	3	0.0483871	0
2	241631239	241638367	3	0.0483871	0
3	38496311	38496316	3	0.0272727	0
3	113465772	113465925	3	0.0272727	0
3	137893707	137893718	3	0.0272727	0
3	182509366	182510892	3	0.0272727	0
4	1762881	1763211	3	0.0333333	0
4	4147958	4149928	3	0.0333333	0
4	9475346	9479622	3	0.0333333	0.0125
4	16258163	16258226	3	0.0333333	0
5	83429	84730	3	0.0171429	0
5	2739652	2739892	3	0.0171429	0
5	78202845	78224071	3	0.0171429	0
5	140098174	140098496	3	0.0171429	0
5	167718496	167718524	3	0.0171429	0
6	297974	379514	3	0.00990099	0
6	29855406	29855435	3	0.00990099	0
6	29894141	29894152	3	0.00990099	0
6	31164776	31164914	3	0.00990099	0
6	31275664	31275881	3	0.00990099	0
6	31334836	31347802	3	0.00990099	0
6	31364942	31364999	3	0.00990099	0
6	31367541	31409319	3	0.00990099	0
6	31461748	31461999	3	0.00990099	0
6	32633163	32640493	3	0.00990099	0.0416667
6	33032830	33036958	3	0.00990099	0
6	33038032	33039414	3	0.00990099	0
6	33290840	33290857	3	0.00990099	0
6	125474805	125474808	3	0.00990099	0
7	56434951	56437009	3	0.0234375	0.0175439
7	57071676	57076951	3	0.0234375	0.0350877
7	62809321	62809373	3	0.0234375	0
7	62859493	62859557	3	0.0234375	0
7	63222556	63225198	3	0.0234375	0
7	101007190	101007442	3	0.0234375	0.0175439
7	128691977	128692716	3	0.0234375	0
8	216453	216578	3	0.029703	0
8	216703	216788	3	0.029703	0.0140845
8	1299636	1300388	3	0.029703	0
8	11986501	11986933	3	0.029703	0
8	11996937	11997496	3	0.029703	0
8	42195861	42195863	3	0.029703	0
10	1369114	1369823	3	0.0188679	0.0212766
10	1411072	1415977	3	0.0188679	0
10	50887472	50887488	3	0.0188679	0
10	71389956	71389959	3	0.0188679	0
11	82095322	82115222	3	0.029703	0
12	26986520	26986763	3	0.0188679	0
12	31271429	31271783	3	0.0188679	0
12	34258505	34261436	3	0.0188679	0
13	27998603	27998609	3	0.107143	0
13	112817661	112818596	3	0.107143	0.00387597
13	113648767	113648882	3	0.107143	0.0116279
14	19613906	19614556	3	0.0379747	0.0107527
15	32607260	32607923	3	0.0714286	0.00581395
15	32607923	32639549	3	0.0714286	0
15	34700272	34817982	3	0.0714286	0
16	2039391	2039411	3	0.0357143	0.0114943
16	2955283	2955295	3	0.0357143	0.0344828
16	83967363	83967545	3	0.0357143	0
17	933047	933155	3	0.0170455	0.0243902
17	19015401	19015961	3	0.0170455	0.0243902
17	19015961	19030144	3	0.0170455	0
17	79051893	79052445	3	0.0170455	0
18	44560277	44561130	3	0.115385	0.00719424
19	54134044	54134782	3	0.023622	0
19	55327234	55327711	3	0.023622	0
20	17673325	17674250	3	0.0666667	0.0185185
20	56964081	56964089	3	0.0666667	0.0123457
20	62151993	62152001	3	0.0666667	0.00625
21	41554681	41554930	3	0.25	0.00830565
1	935456	936229	2	0.00735294	0
1	12891355	12893344	2	0.00735294	0
1	12946833	13036637	2	0.00735294	0
1	16974255	16975005	2	0.00735294	0
1	38157962	38157968	2	0.00735294	0.0555556
1	74663297	74663827	2	0.00735294	0
1	85040254	85040343	2	0.00735294	0
1	110230252	110230401	2	0.00735294	0
1	148000579	148000763	2	0.00735294	0
1	148933698	149069731	2	0.00735294	0
1	149187077	149212246	2	0.00735294	0
1	150315420	150333953	2	0.00735294	0
1	161410551	161427101	2	0.00735294	0
2	130956255	130956271	2	0.0322581	0
2	131975750	131975771	2	0.0322581	0.0128205
2	132202537	132203745	2	0.0322581	0
2	239144301	239145904	2	0.0322581	0
3	17666379	17686199	2	0.0181818	0
3	123602485	123607235	2	0.0181818	0
3	196325238	196325552	2	0.0181818	0
4	7750448	7750480	2	0.0222222	0
4	10147038	10147330	2	0.0222222	0.037037
4	140222502	140222523	2	0.0222222	0
5	646259	649884	2	0.0114286	0.037037
5	69371421	69483768	2	0.0114286	0
5	135416412	135416594	2	0.0114286	0
5	140097950	140098174	2	0.0114286	0
5	140214372	140221364	2	0.0114286	0
5	140228182	140237879	2	0.0114286	0
5	171881549	171881583	2	0.0114286	0
5	179071604	179071901	2	0.0114286	0
5	180670992	180670995	2	0.0114286	0
6	29851755	29855302	2	0.00660066	0
6	29855435	29894141	2	0.00660066	0
6	29894248	29898751	2	0.00660066	0
6	30039403	30039432	2	0.00660066	0
6	31164378	31164776	2	0.00660066	0
6	31275881	31276664	2	0.00660066	0
6	31324565	31324916	2	0.00660066	0
6	31347802	31364902	2	0.00660066	0
6	31439497	31458944	2	0.00660066	0
6	31782918	31782929	2	0.00660066	0
6	32557404	32632106	2	0.00660066	0
6	33036958	33038032	2	0.00660066	0
6	33039414	33039804	2	0.00660066	0
6	33356860	33358040	2	0.00660066	0
6	130543838	130544832	2	0.00660066	0
6	168757168	168758843	2	0.00660066	0
6	169240458	169241214	2	0.00660066	0
6	170484120	170485891	2	0.00660066	0.0625
7	220911	231526	2	0.015625	0
7	6865970	6867070	2	0.015625	0
7	23054001	23054024	2	0.015625	0
7	56437009	56437746	2	0.015625	0.0263158
7	57071509	57071676	2	0.015625	0.0263158
7	63016648	63016835	2	0.015625	0
7	102161506	102212892	2	0.015625	0
7	102212892	102259241	2	0.015625	0
7	144049427	144054288	2	0.015625	0
7	158059142	158059179	2	0.015625	0.027027
7	158712251	158712271	2	0.015625	0
8	2075469	2075820	2	0.019802	0.0208333
8	7216871	7396283	2	0.019802	0
8	7571231	7571936	2	0.019802	0
8	7650102	7754234	2	0.019802	0
8	15420520	15431358	2	0.019802	0
8	19674705	19674713	2	0.019802	0
8	135476712	135476917	2	0.019802	0.0416667
8	141348866	141349212	2	0.019802	0.0416667
8	145845260	145845573	2	0.019802	0.0212766
9	115833890	115835613	2	0.0444444	0.0185185
10	13142334	13143470	2	0.0125786	0
10	38738941	38739819	2	0.0125786	0
10	69835323	69848268	2	0.0125786	0
10	71892768	71892787	2	0.0125786	0
10	73004576	73004610	2	0.0125786	0
10	135254748	135254792	2	0.0125786	0
11	1086733	1086863	2	0.019802	0
11	17036137	17036142	2	0.019802	0.0212766
11	34517541	34523679	2	0.019802	0
11	60970290	61007964	2	0.019802	0
11	61008041	61008109	2	0.019802	0
11	64546351	64546370	2	0.019802	0
11	131780334	131780353	2	0.019802	0
12	148077	149764	2	0.0125786	0
12	12878428	12878440	2	0.0125786	0
12	19282349	19282374	2	0.0125786	0
12	57984920	57984923	2	0.0125786	0
12	102457300	102459329	2	0.0125786	0
12	114029248	114029577	2	0.0125786	0
12	130968528	130968614	2	0.0125786	0
12	133003394	133003928	2	0.0125786	0
12	133335658	133335817	2	0.0125786	0.0322581
13	27998609	27998621	2	0.0714286	0
13	95248882	95253676	2	0.0714286	0
14	19600442	19613906	2	0.0253165	0.016129
14	20215980	20247697	2	0.0253165	0.0163934
14	74026160	74026915	2	0.0253165	0
14	97431137	97431164	2	0.0253165	0
14	105373082	105373391	2	0.0253165	0
15	21146458	21147039	2	0.047619	0.00869565
15	32605028	32607260	2	0.047619	0
15	32639549	32729745	2	0.047619	0
15	38987310	38987640	2	0.047619	0.0172414
15	65669594	65669821	2	0.047619	0
15	75287851	75287854	2	0.047619	0.0172414
16	214776	214970	2	0.0238095	0.0172414
16	21513691	21514953	2	0.0238095	0.0344828
16	89883212	89883240	2	0.0238095	0
17	85360	85492	2	0.0113636	0.0357143
17	18967111	19015401	2	0.0113636	0.0357143
17	21279613	21279621	2	0.0113636	0
17	34641309	34757624	2	0.0113636	0
17	62340717	62340732	2	0.0113636	0
17	79051613	79051893	2	0.0113636	0
17	79905219	79905255	2	0.0113636	0
18	10589357	10589360	2	0.0769231	0.0107527
18	74799500	74799572	2	0.0769231	0.00540541
18	77568900	77568902	2	0.0769231	0.00540541
18	77588682	77589649	2	0.0769231	0.0107527
19	9731811	9731957	2	0.015748	0
19	10172712	10172841	2	0.015748	0
19	35068710	35069691	2	0.015748	0
19	38343327	38344455	2	0.015748	0
19	43691930	43710277	2	0.015748	0
19	46628137	46628367	2	0.015748	0
19	53836837	53836866	2	0.015748	0
20	1206682	1206693	2	0.0444444	0.00925926
20	2188420	2188511	2	0.0444444	0
22	17489225	17489367	2	0.0235294	0
22	18669132	18737348	2	0.0235294	0
22	20342520	20502597	2	0.0235294	0
22	20710577	20714779	2	0.0235294	0
22	22312957	22465502	2	0.0235294	0
22	24284359	24300612	2	0.0235294	0
22	29196489	29196494	2	0.0235294	0
1	1161866	1162280	1	0.00367647	0
1	1677105	1677548	1	0.00367647	0
1	1917911	1920339	1	0.00367647	0
1	2876546	2876723	1	0.00367647	0
1	3028485	3028813	1	0.00367647	0
1	13036637	13111908	1	0.00367647	0
1	16810147	16810776	1	0.00367647	0
1	16975005	16975443	1	0.00367647	0
1	19110922	19113523	1	0.00367647	0
1	25598878	25660365	1	0.00367647	0
1	38157909	38157962	1	0.00367647	0.111111
1	57111099	57111199	1	0.00367647	0
1	63789341	63790202	1	0.00367647	0
1	76251865	76251867	1	0.00367647	0
1	91870382	91870389	1	0.00367647	0
1	101488098	101830939	1	0.00367647	0
1	110230401	110230545	1	0.00367647	0
1	114697032	114697113	1	0.00367647	0
1	143663862	143664131	1	0.00367647	0
1	148854572	148855760	1	0.00367647	0
1	149514272	149576021	1	0.00367647	0
1	150313655	150315420	1	0.00367647	0
1	161601053	161602335	1	0.00367647	0
1	165738514	165738563	1	0.00367647	0
1	182361500	182361507	1	0.00367647	0
1	182361509	182361528	1	0.00367647	0
1	196743672	196795943	1	0.00367647	0
1	200708027	200708096	1	0.00367647	0
1	202091865	202091880	1	0.00367647	0
1	231176985	231176991	1	0.00367647	0
1	245710332	245710401	1	0.00367647	0
1	246139168	246140350	1	0.00367647	0
1	246684113	246684329	1	0.00367647	0
1	248100345	248100585	1	0.00367647	0
2	1358283	1358513	1	0.016129	0
2	2726437	2726500	1	0.016129	0
2	8116953	8117019	1	0.016129	0
2	12147206	12147243	1	0.016129	0
2	73867196	73907327	1	0.016129	0
2	108443511	108446590	1	0.016129	0
2	108537568	108537774	1	0.016129	0
2	111877177	111877753	1	0.016129	0
2	112812130	112812957	1	0.016129	0
2	122288370	122288388	1	0.016129	0
2	130878292	130878313	1	0.016129	0.025641
2	132203745	132218302	1	0.016129	0
2	132584904	132587079	1	0.016129	0.025641
2	242710250	242710939	1	0.016129	0
3	1809617	2004766	1	0.00909091	0
3	17583522	17666379	1	0.00909091	0
3	21832523	22422855	1	0.00909091	0
3	48754871	48754875	1	0.00909091	0
3	49067045	49067097	1	0.00909091	0
3	53912235	53914075	1	0.00909091	0
3	64670013	64670017	1	0.00909091	0
3	75705108	75705922	1	0.00909091	0
3	100428145	100428147	1	0.00909091	0
3	126260615	126261298	1	0.00909091	0
3	126373967	126373980	1	0.00909091	0
3	128840619	128840836	1	0.00909091	0
3	129107604	129116479	1	0.00909091	0
3	137893699	137893707	1	0.00909091	0
3	138739874	138740313	1	0.00909091	0
3	157122686	157152139	1	0.00909091	0
3	183993721	183993726	1	0.00909091	0
3	195447691	195460818	1	0.00909091	0
3	195489306	195489909	1	0.00909091	0
3	197385002	197388269	1	0.00909091	0
3	197517984	197518007	1	0.00909091	0
4	1366463	1366662	1	0.0111111	0
4	3726255	3726836	1	0.0111111	0.037037
4	4117213	4119945	1	0.0111111	0
4	4139646	4147958	1	0.0111111	0
4	6675660	6675680	1	0.0111111	0
4	13545639	13546292	1	0.0111111	0.037037
4	16258226	16258684	1	0.0111111	0
4	22148230	22148354	1	0.0111111	0
4	46391524	46391532	1	0.0111111	0
4	49297073	49308567	1	0.0111111	0
4	71248310	71270447	1	0.0111111	0.037037
4	132683397	132899460	1	0.0111111	0.037037
4	150999949	151000684	1	0.0111111	0.037037
4	181463296	181480012	1	0.0111111	0
5	462522	463534	1	0.00571429	0
5	679849	841092	1	0.00571429	0
5	1594282	1594808	1	0.00571429	0.0714286
5	34044504	34044727	1	0.00571429	0
5	55412925	55418205	1	0.00571429	0
5	69345099	69371421	1	0.00571429	0
5	79950501	79950508	1	0.00571429	0
5	90679543	90680542	1	0.00571429	0
5	106801945	106822849	1	0.00571429	0
5	110189233	110252994	1	0.00571429	0
5	135416594	135416613	1	0.00571429	0
5	140221364	140222253	1	0.00571429	0
5	140222253	140228182	1	0.00571429	0
5	148033708	148034045	1	0.00571429	0
5	155351524	155548458	1	0.00571429	0
5	171881546	171881549	1	0.00571429	0
5	175488849	175491744	1	0.00571429	0
5	176131019	176131052	1	0.00571429	0
5	177298965	177302752	1	0.00571429	0
5	179740743	179741120	1	0.00571429	0
5	180526995	180527697	1	0.00571429	0
5	180670960	180670992	1	0.00571429	0
5	180670995	180671165	1	0.00571429	0
6	293331	296538	1	0.00330033	0
6	2999962	3000058	1	0.00330033	0
6	6605918	6606132	1	0.00330033	0
6	10520874	10530035	1	0.00330033	0
6	25882463	25882590	1	0.00330033	0
6	26914441	26924550	1	0.00330033	0
6	27648895	27648908	1	0.00330033	0
6	29648901	29649084	1	0.00330033	0
6	29911087	29911265	1	0.00330033	0
6	29924256	29924310	1	0.00330033	0
6	29943455	29943480	1	0.00330033	0
6	30038998	30039376	1	0.00330033	0
6	30039380	30039403	1	0.00330033	0
6	30039442	30039476	1	0.00330033	0
6	30449064	30449068	1	0.00330033	0
6	30654693	30654716	1	0.00330033	0
6	30954962	30955142	1	0.00330033	0
6	31083322	31084107	1	0.00330033	0
6	31148370	31148606	1	0.00330033	0
6	31164924	31164947	1	0.00330033	0
6	31239767	31240223	1	0.00330033	0
6	31275643	31275664	1	0.00330033	0
6	31324512	31324565	1	0.00330033	0
6	31459901	31461748	1	0.00330033	0
6	31509402	31509427	1	0.00330033	0
6	31540114	31540136	1	0.00330033	0
6	31963912	31980043	1	0.00330033	0
6	32013699	32013710	1	0.00330033	0
6	32121841	32121843	1	0.00330033	0
6	32938280	32938295	1	0.00330033	0
6	33049983	33052797	1	0.00330033	0
6	33084554	33084608	1	0.00330033	0
6	33244715	33244755	1	0.00330033	0
6	33757054	33757077	1	0.00330033	0
6	41068553	41068646	1	0.00330033	0
6	41123086	41123110	1	0.00330033	0
6	49917254	49917872	1	0.00330033	0
6	73973719	74007703	1	0.00330033	0
6	74363775	74363879	1	0.00330033	0
6	100914639	100914733	1	0.00330033	0
6	125474720	125474805	1	0.00330033	0
6	125474808	125474828	1	0.00330033	0
6	133119734	133119739	1	0.00330033	0
6	161561066	161561121	1	0.00330033	0
6	169225555	169226385	1	0.00330033	0
6	169641232	169641288	1	0.00330033	0
6	170485891	170487311	1	0.00330033	0
7	231526	232095	1	0.0078125	0
7	1113237	1114381	1	0.0078125	0
7	1198841	1198926	1	0.0078125	0
7	8302251	8302271	1	0.0078125	0
7	23053981	23054001	1	0.0078125	0
7	23454699	23454734	1	0.0078125	0
7	53879422	53879728	1	0.0078125	0
7	63667330	63667446	1	0.0078125	0
7	64043012	64043193	1	0.0078125	0.0526316
7	76126629	76149509	1	0.0078125	0
7	76624761	76625569	1	0.0078125	0
7	143270135	143317270	1	0.0078125	0
7	143533786	143538037	1	0.0078125	0
7	143893948	143895753	1	0.0078125	0
7	152622455	152622787	1	0.0078125	0
7	154453651	154455411	1	0.0078125	0.0526316
7	158649319	158649327	1	0.0078125	0
8	215923	216453	1	0.00990099	0
8	1797886	1797917	1	0.00990099	0
8	3974030	3974225	1	0.00990099	0
8	7113417	7113462	1	0.00990099	0
8	7213522	7216871	1	0.00990099	0
8	7630279	7631469	1	0.00990099	0
8	8085496	8085844	1	0.00990099	0
8	8086607	8090460	1	0.00990099	0
8	11973495	11986501	1	0.00990099	0
8	28479636	28479639	1	0.00990099	0
8	74006994	74009438	1	0.00990099	0
8	82754313	82754387	1	0.00990099	0.0416667
8	125740429	125740498	1	0.00990099	0
8	139165563	139165568	1	0.00990099	0
8	144635309	144636113	1	0.00990099	0
8	144810034	144810657	1	0.00990099	0
9	211689	215561	1	0.0222222	0.0185185
9	45726961	45733081	1	0.0222222	0.0185185
9	115822072	115833890	1	0.0222222	0.0185185
9	140153393	140156185	1	0.0222222	0
10	368911	369137	1	0.00628931	0
10	1415977	1416142	1	0.00628931	0
10	2563644	2563965	1	0.00628931	0
10	30638342	30638372	1	0.00628931	0.0625
10	38738647	38738941	1	0.00628931	0
10	38739885	38740029	1	0.00628931	0
10	47599596	47652495	1	0.00628931	0
10	71892694	71892768	1	0.00628931	0
10	86001241	86001246	1	0.00628931	0
10	109849668	109857081	1	0.00628931	0
10	125751386	125751413	1	0.00628931	0
10	134647259	134647457	1	0.00628931	0
10	134925902	134926810	1	0.00628931	0
10	135122020	135122230	1	0.00628931	0
10	135122752	135122788	1	0.00628931	0
10	135254792	135259199	1	0.00628931	0
10	135387962	135394507	1	0.00628931	0
11	487126	487213	1	0.00990099	0
11	858840	859915	1	0.00990099	0.0416667
11	1312565	1312923	1	0.00990099	0.0416667
11	7818165	7819874	1	0.00990099	0
11	10209919	10229755	1	0.00990099	0
11	11643754	11643760	1	0.00990099	0
11	20690930	20690934	1	0.00990099	0
11	22453679	22454661	1	0.00990099	0
11	22851383	22851422	1	0.00990099	0
11	55431584	55594854	1	0.00990099	0
11	66035629	66035641	1	0.00990099	0
11	78512268	78521705	1	0.00990099	0
11	82782984	82783003	1	0.00990099	0
11	86142407	86142587	1	0.00990099	0.0416667
11	122192427	122198071	1	0.00990099	0.0416667
11	129903006	129903187	1	0.00990099	0
11	131780276	131780278	1	0.00990099	0
11	132864104	132864113	1	0.00990099	0
11	134603744	134605862	1	0.00990099	0
12	3782889	3783166	1	0.00628931	0
12	6241975	6243110	1	0.00628931	0
12	6420034	6420041	1	0.00628931	0
12	7053164	7053170	1	0.00628931	0
12	7781004	7781093	1	0.00628931	0
12	8541476	8543302	1	0.00628931	0
12	9757161	9760326	1	0.00628931	0
12	32112286	32112291	1	0.00628931	0
12	50297936	50297945	1	0.00628931	0
12	52586810	52596367	1	0.00628931	0
12	53473297	53473299	1	0.00628931	0
12	110012484	110012500	1	0.00628931	0
12	129572610	129573603	1	0.00628931	0
12	130389010	130389013	1	0.00628931	0
12	130968391	130968528	1	0.00628931	0
12	132286017	132286231	1	0.00628931	0
12	132880790	132882028	1	0.00628931	0
12	132970851	132971019	1	0.00628931	0
13	34117139	34118017	1	0.0357143	0
13	47035271	47036612	1	0.0357143	0
13	61490935	61491000	1	0.0357143	0.0116279
13	98885809	98892233	1	0.0357143	0
13	110959356	110960177	1	0.0357143	0.0116279
13	114051373	114054316	1	0.0357143	0
13	114840743	114841904	1	0.0357143	0.0116279
13	114890416	114890515	1	0.0357143	0.0116279
13	114964101	114964125	1	0.0357143	0.0114943
14	19962440	20012038	1	0.0126582	0
14	20404281	20444164	1	0.0126582	0
14	22694547	22958399	1	0.0126582	0
14	41623629	41623854	1	0.0126582	0.0322581
14	50234605	50234671	1	0.0126582	0.0322581
14	62229147	62229171	1	0.0126582	0
14	73360841	73360857	1	0.0126582	0
14	92790072	92790285	1	0.0126582	0
14	99641017	99641151	1	0.0126582	0.0322581
14	103593503	103593520	1	0.0126582	0
14	105186699	105187498	1	0.0126582	0
14	106791268	106806143	1	0.0126582	0.0322581
14	107095027	107186057	1	0.0126582	0
15	26107658	26108412	1	0.0238095	0
15	31664259	31664460	1	0.0238095	0
15	32729745	32821699	1	0.0238095	0
15	40228656	40233976	1	0.0238095	0.0172414
15	50716270	50716322	1	0.0238095	0
15	52404977	52405026	1	0.0238095	0
15	74023856	74024097	1	0.0238095	0
15	75095006	75095171	1	0.0238095	0
15	93616943	93616966	1	0.0238095	0
15	99791282	99791336	1	0.0238095	0
15	102511865	102520452	1	0.0238095	0
16	214970	215002	1	0.0119048	0.0344828
16	224928	225666	1	0.0119048	0
16	1006052	1006166	1	0.0119048	0
16	1295309	1297816	1	0.0119048	0.0344828
16	1383574	1383595	1	0.0119048	0.0344828
16	18482212	18487960	1	0.0119048	0
16	55850985	55851398	1	0.0119048	0
16	57562740	57562841	1	0.0119048	0
16	57769538	57769597	1	0.0119048	0.0344828
16	84083975	84085290	1	0.0119048	0.0344828
16	85966435	85966545	1	0.0119048	0.0344828
16	88263144	88263261	1	0.0119048	0
17	929653	933047	1	0.00568182	0.0714286
17	933155	933179	1	0.00568182	0
17	10102232	10102237	1	0.00568182	0
17	17714293	17714414	1	0.00568182	0
17	18965580	18967111	1	0.00568182	0.0714286
17	19030146	19100051	1	0.00568182	0
17	34757624	34758523	1	0.00568182	0
17	39150166	39155777	1	0.00568182	0
17	44394546	44702619	1	0.00568182	0
17	55333919	55333926	1	0.00568182	0
17	66194695	66194706	1	0.00568182	0
17	70120411	70120541	1	0.00568182	0
17	71189066	71189068	1	0.00568182	0.0714286
17	75522182	75522449	1	0.00568182	0
17	76970857	76970864	1	0.00568182	0
17	77127220	77127426	1	0.00568182	0
17	79479815	79479834	1	0.00568182	0.0714286
17	81052622	81052770	1	0.00568182	0.0714286
18	2571313	2571394	1	0.0384615	0.0107527
18	12254551	12254556	1	0.0384615	0.0107527
18	12703040	12703072	1	0.0384615	0.0107527
18	54813330	54814189	1	0.0384615	0
18	74499372	74499584	1	0.0384615	0.0107527
18	74960996	74961002	1	0.0384615	0.0107527
18	77793812	77794335	1	0.0384615	0
19	387968	398562	1	0.00787402	0
19	728040	728095	1	0.00787402	0
19	2131293	2131296	1	0.00787402	0
19	12876846	12877000	1	0.00787402	0
19	19431379	19431407	1	0.00787402	0
19	33622953	33622961	1	0.00787402	0
19	40372977	40375973	1	0.00787402	0
19	43710277	43711064	1	0.00787402	0
19	45873902	45874080	1	0.00787402	0
19	49140777	49140787	1	0.00787402	0
19	49197853	49207303	1	0.00787402	0
19	49866923	49866942	1	0.00787402	0
19	49990766	49990808	1	0.00787402	0
19	51107781	51108274	1	0.00787402	0
19	53496835	53496893	1	0.00787402	0
19	54746613	54748112	1	0.00787402	0
19	55280577	55309528	1	0.00787402	0
19	55549722	55549746	1	0.00787402	0
19	57831544	57831549	1	0.00787402	0
19	58951672	58951684	1	0.00787402	0
20	708659	709016	1	0.0222222	0.0185185
20	23549522	23549525	1	0.0222222	0.0185185
20	35402295	35402300	1	0.0222222	0
20	62550734	62550740	1	0.0222222	0
21	34144118	34144284	1	0.0833333	0.00995025
21	40684731	40685208	1	0.0833333	0.005
21	47581042	47582049	1	0.0833333	0.005
22	16286998	16292001	1	0.0117647	0
22	17652741	17653367	1	0.0117647	0
22	18668835	18669132	1	0.0117647	0
22	18825219	18832673	1	0.0117647	0.0344828
22	20714779	20715555	1	0.0117647	0
22	24345907	24348715	1	0.0117647	0
22	30233609	30234213	1	0.0117647	0.0344828
22	37975941	37976725	1	0.0117647	0
22	38851345	38851366	1	0.0117647	0
22	39378283	39378425	1	0.0117647	0
22	47558273	47559425	1	0.0117647	0
22	50528213	50528333	1	0.0117647	0
22	50531970	50585197	1	0.0117647	0

## Sheet: FRQ_over_chromosomes
chromosome	CNA_frequency
1	272
2	62
3	110
4	90
5	175
6	303
7	128
8	101
9	45
10	159
11	101
12	159
13	28
14	79
15	42
16	84
17	176
18	26
19	127
20	45
21	12
22	85
