# Supplementary material for: Exposure to arsenic and intra-chromosomal instability in blood
Source: Royal Society of Chemistry journal article supplement (doi:10.1039/c4mt00128a), 2014-01-01
Supplement: c4mt00128a2.pdf [file c4mt00128a2.pdf]

**Supplementary data 1 – description to excel file**

**Sheet name: RAW-data- contains all CNAs computed by CHAMP pipeline for each sample.**

Column A – sample ID  
Column B – chromosome nr  
Columns C and D – CNAs start and end  
Column E – segment mean, measurement of the significance for given CNA to be deleted/amplified; for details see <sup>1</sup>.

**Sheet name: sorted0.33: list of CNAs meeting a significance level of “seg.mean” of 0.33 (for details see <sup>1,2</sup>).**

Column A – sample name  
Column B – chromosome nr  
Columns C and D – CNAs start and end  
Column E – segment mean for “significant (above and below 0.33)” CNAs

**Sheet name: CNA frequency in each sample and exposure data**

Column A – sample name  
Column B – CNA frequency  
Column C – U-As, measurement of the arsenic in urine  
Column D – samples classification to low-U-As=1 and high-U-As=2

**Sheet name: Mostr\_common\_CNA\_output– contains results of the overlapping of all CNAs from each sample (most common CNAs).**

Column A, B and C – coordinates of the most common CNA,  
Column D – number of samples with specific CNA,  
Column E – length of the specific overlap common in all the sample harboring specific overlap

Column F – proportion of the sample where given overlap was positive – amplified.

**Sheet name: FRQ\_over\_chromosomes– contains the frequency count of the CNA for each chromosome.**

1. T. J. Morris, L. M. Butcher, A. Feber, A. E. Teschendorff, A. R. Chakravarthy, T. K. Wojdacz and S. Beck, *Bioinformatics*, 2014, 30, 428-430.
2. A. Feber, P. Guilhamon, M. Lechner, T. Fenton, G. A. Wilson, C. Thirlwell, T. J. Morris, A. M. Flanagan, A. E. Teschendorff, J. D. Kelly and S. Beck, *Genome biology*, 2014, 15, R30.
